# Supplementary material for: Frequent host-switch and gene exchange shape the evolution of Staphylococcus aureus ST398
Source: Research Square preprint supplement (doi:10.21203/rs.3.rs-4103684/v1), 2024-03-22
Supplement: Supplementary file 1 [file 2142dde8b5c0f34ba7ac8beb.docx]

#### Supplementary Methods

#### Collection of ST398 isolates from clinical trials and research studies

In the local collection, we incorporated a total of 176 *S. aureus* ST398 isolates from various clinical trials and research studies as outlined in Table 1 and Supplementary Table S7. These isolates were obtained from both humans and animals spanning the period from 1998 to 2019, encompassing regions in Europe and Asia.

ASPIRE-ICU (NCT02413242) was a prospective observational cohort study, conducted across 30 intensive care units (ICUs) in 11 European countries between 2015 and 2018. This multicenter epidemiological study aimed to explore the occurrence and identify risk factors associated with ICU pneumonia caused by *S. aureus* and *P. aeruginosa* [1]. The study enrolled a total of 1997 ICU patients, with 50% demonstrating *S. aureus* positive in either or both nose and lower respiratory tract samples upon admission. Throughout ICU stay, participants underwent systemic sampling, including nose swabs on Day 1, Day 4 and Day 7, as well as lower respiratory tract samples on Day 1 and twice weekly for five weeks or until ICU discharge. In case of pneumonia diagnosis, additional lower respiratory tract samples were obtained on the day of diagnosis and seven days thereafter. The collected samples were cultured, and *S. aureus* isolates were subjected to whole genome sequencing. Twenty-five *S. aureus* ST398 isolates from 21 patients were included in the current study. The criterion for defining *S. aureus* ST398 pneumonia was the identification of *S. aureus* ST398 in the lower respiratory tract sample at the time of pneumonia diagnosis.

ASPIRE-SSI (NCT02935244) was a multicenter, observational, prospective cohort study that assessed the incidence and risk factors associated with surgical site and bloodstream infections (SSI and BSI) caused by *S. aureus* in Europe [2]. Between 2016 and 2019, the study recruited 5004 surgical patients across 33 hospitals in 10 European countries. Eligible patients were screened within 30 days prior to their surgery for *S. aureus* carriage in the nose, throat and perineum for *S. aureus* carriage with 66% of enrolled patients tested positive for *S. aureus* in one or more body sites. If a postoperative infection was suspected, samples were collected for *S. aureus* screening. Samples were cultured and isolates were subjected to whole genome sequencing. In the current study, 57 ASPIRE-SSI *S. aureus* ST398 isolates derived from 31 patients were included in the current study. The classification of *S. aureus* ST398 SSI and BSI was defined by the identification of *S. aureus* ST398 in wound cultures or blood cultures, respectively.

SAATELLITE (NCT02296320) was a multicenter, randomised, double-blind, placebo-controlled, parallel-group, phase 2 pilot study that was conducted across 31 hospitals in 9 countries, to investigate the efficacy of a human monoclonal antibody against *S. aureus* alpha toxin (Suvratoxumab) in mechanically ventilated adult subjects [3]. A total of 211 ICU patients were enrolled, with all participants testing positive for *S. aureus* colonisation in the lower respiratory tract. Post-enrolment, additional respiratory samples were collected at various time points for *S. aureus* culture, and in case of pneumonia diagnosis, daily samples were collected. *S. aureus* isolates (baseline, onset and last available isolates from suspected serious bacterial infections) were collected from lower respiratory tract samples and blood and were subjected to whole genome sequencing. In the current study, 35 SAATELLITE *S. aureus* ST398 isolates from 20 patients were included. *S. aureus* ST398 pneumonia was defined as the presence of *S. aureus* ST398 in the lower respiratory tract or in the blood at the time of pneumonia diagnosis.

The Study of Health in Pomerania (SHIP) was a population-based epidemiological study in Western Pomerania (in the northeast of Germany). Its primary aim was to assess the prevalence and incidence of common risk factors, subclinical disorders and clinical diseases, and to investigate their complex associations [4]. As part of the study, nose swabs were obtained for culture between 2008 and 2012 (SHIP-TREND-0) and between 2016 and 2019 (SHIP-TREND-1). Eighteen SHIP-TREND *S. aureus* ST398 isolates were included in the current study.

Raafat et al. (2020) [5] performed a study on *S. aureus* carriage in rats, with a special focus on antibiotic resistance and humans-specific virulence genes. ST398 strains were isolated from captive wild rats from Germany that were held in laboratory housing or large enclosures for several years. Seven rat isolates collected between 2016 and 2017 were included in the current study.

Lekkerkerk et al. (2015) [6] investigated the origin of livestock-associated ST398 isolates from humans lacking direct contact with livestock. All isolates were collected in the Netherlands. A total of 33 isolates were included in the current study, comprising 9 humans isolates from 2009, and 1 humans isolate from 1998. The isolates from animal origin were collected from various livestock species. The pig isolates (n=7) were from apparently healthy animals in different farms across The Netherlands, and 8 isolates were from the healthy veal calves in Dutch farms. The horse isolates (n=3) were sampled from diseased horses and the chicken isolates (n=5) were obtained from broiler slaughterhouses.

Ip et al. (2005) [7] examined epidemic clones of ST398 causing bacteraemia in patients in major Hong Kong hospitals during the period 2000 and 2001. One ST398 isolate was included in the current study.

**References**

1. Paling FP, Troeman DP, Wolkewitz M, Kalyani R, Prins DR, Weber S, et al. Rationale and design of ASPIRE-ICU: a prospective cohort study on the incidence and predictors of Staphylococcus aureus and Pseudomonas aeruginosa pneumonia in the ICU. BMC Infect Dis. 2017;17:1-6.

2. Troeman DP, Hazard D, Timbermont L, Malhotra-Kumar S, Van Werkhoven CH, Wolkewitz M, et al. Postoperative Staphylococcus aureus infections in patients with and without preoperative colonization. JAMA network open. 2023;6:e2339793-e2339793.

3. François B, Jafri HS, Chastre J, Sánchez-García M, Eggimann P, Dequin P-F, et al. Efficacy and safety of suvratoxumab for prevention of Staphylococcus aureus ventilator-associated pneumonia (SAATELLITE): a multicentre, randomised, double-blind, placebo-controlled, parallel-group, phase 2 pilot trial. The lancet infectious diseases. 2021;21:1313-1323.

4. Holtfreter S, Grumann D, Balau V, Barwich A, Kolata J, Goehler A, et al. Molecular epidemiology of Staphylococcus aureus in the general population in Northeast Germany: results of the study of health in Pomerania (SHIP-TREND-0). J Clin Microbiol. 2016;54:2774-2785.

5. Raafat D, Mrochen DM, Al’Sholui F, Heuser E, Ryll R, Pritchett-Corning KR, et al. Molecular epidemiology of methicillin-susceptible and methicillin-resistant Staphylococcus aureus in wild, captive and laboratory rats: Effect of habitat on the nasal S. aureus population. Toxins. 2020;12:80.

6. Lekkerkerk W, Van Wamel W, Snijders S, Willems R, van Duijkeren E, Broens E, et al. What is the origin of livestock-associated methicillin-resistant Staphylococcus aureus clonal complex 398 isolates from humans without livestock contact? An epidemiological and genetic analysis. J Clin Microbiol. 2015;53:1836-1841.

7. Ip M, Yung R, Ng T, Luk W, Tse C, Hung P, et al. Contemporary methicillin-resistant Staphylococcus aureus clones in Hong Kong. J Clin Microbiol. 2005;43:5069-5073.
