# Supplementary material for: Frequent host-switch and gene exchange shape the evolution of Staphylococcus aureus ST398
Source: Research Square preprint supplement (doi:10.21203/rs.3.rs-4103684/v1), 2024-03-22
Supplement: Supplementary file 2 [file 90084406caaa8b61df43e3a6.xlsx]

## Sheet: Table S1
Table S1 Information of collected ST398 isolates in publicly available databases.
Genome ID	Collection country	Collection year	Host species	Major groups of host species	Project	sample
GCA_000258685.1	USA	2004	Human	Human	PRJNA66999	SAMN02603419
GCA_001940425.1	Denmark	2007	Human	Human	PRJNA279228	SAMN03450776
GCA_000252405.2	Dominica	2007	Human	Human	PRJNA70631	SAMN02469651
GCA_001455955.1	Brazil	2012	Pig	Pig	PRJNA303158	SAMN04287217
GCA_002025125.1	Germany	2012	Pig	Pig	PRJNA378150	SAMN06480668
GCA_001887075.1	Canada	2013	Chicken	Poultry	PRJNA302644	SAMN04276964
GCA_002089035.2	Canada	2014	Human	Human	PRJNA362943	SAMN06251153
GCA_008462245.1	China	2014	Human	Human	PRJNA542127	SAMN11611367
GCA_008763725.1	Australia	2015	Human	Human	PRJNA560124	SAMN12569114
GCA_008763655.1	Australia	2015	Human	Human	PRJNA560124	SAMN12569117
GCA_008763575.1	Australia	2015	Human	Human	PRJNA560124	SAMN12569121
GCA_008763565.1	Australia	2015	Human	Human	PRJNA560124	SAMN12569122
GCA_008763535.1	Australia	2015	Human	Human	PRJNA560124	SAMN12569123
GCA_008763525.1	Australia	2015	Human	Human	PRJNA560124	SAMN12569125
GCA_008763485.1	Australia	2015	Human	Human	PRJNA560124	SAMN12569126
GCA_008763405.1	Australia	2015	Human	Human	PRJNA560124	SAMN12569129
GCA_008763455.1	Australia	2015	Human	Human	PRJNA560124	SAMN12569128
GCA_008763735.1	Australia	2015	Human	Human	PRJNA560124	SAMN12569112
GCA_008763675.1	Australia	2015	Human	Human	PRJNA560124	SAMN12569116
GCA_008763615.1	Australia	2015	Human	Human	PRJNA560124	SAMN12569120
GCA_008763505.1	Australia	2015	Human	Human	PRJNA560124	SAMN12569124
GCA_008763465.1	Australia	2015	Human	Human	PRJNA560124	SAMN12569127
GCA_008763395.1	Australia	2015	Human	Human	PRJNA560124	SAMN12569130
GCA_008763755.1	Australia	2015	Human	Human	PRJNA560124	SAMN12569113
GCA_008763835.1	Australia	2015	Human	Human	PRJNA560124	SAMN12569107
GCA_008763785.1	Australia	2015	Human	Human	PRJNA560124	SAMN12569111
GCA_008763625.1	Australia	2015	Human	Human	PRJNA560124	SAMN12569119
GCA_008763845.1	Australia	2015	Human	Human	PRJNA560124	SAMN12569108
GCA_003111745.1	Australia	2015	Pig	Pig	PRJNA454185	SAMN08999457
GCA_015767495.1	China	2016	Pig	Pig	PRJNA680203	SAMN16871896
GCA_010994215.1	China	2018	Cattle	Cattle	PRJNA589507	SAMN13282773
GCA_010994155.1	China	2018	Cattle	Cattle	PRJNA589507	SAMN13282774
GCA_018682265.1	China	2018	Pig	Pig	PRJNA694330	SAMN17517067
GCA_020003165.1	Netherlands	2021	Human	Human	PRJNA739993	SAMN19813410
GCA_020003145.1	Netherlands	2021	Human	Human	PRJNA739990	SAMN19812812
GCA_019264465.1	China	2018	Milk	Cattle	PRJNA745532	SAMN20168878
GCA_001726145.1	Brazil	2010	Human	Human	PRJNA324673	SAMN05213228
GCA_008763665.1	Australia	2015	Human	Human	PRJNA560124	SAMN12569118
GCA_008763815.1	Australia	2015	Human	Human	PRJNA560124	SAMN12569109
GCA_008763715.1	Australia	2015	Human	Human	PRJNA560124	SAMN12569115
GCA_008763805.1	Australia	2015	Human	Human	PRJNA560124	SAMN12569110
GCA_002204575.1	USA	2010	Pig	Pig	PRJNA315880	SAMN04571756
SRR5054905_L001_R1_001	China	2014	Cattle	Cattle	PRJNA347471	SAMN05942162
SRR5054923_L001_R1_001	China	2014	Cattle	Cattle	PRJNA347471	SAMN05942166
SRR1329283_L001_R1_001	Netherlands	2009	Human	Human	PRJNA226567	SAMN02404132
SRR15903564_L001_R1_001	France	2016	Cat	Cat	PRJNA763220	SAMN21435892
SRR9046756_L001_R1_001	China	1999	Human	Human	PRJNA542130	SAMN11611374
SRR1300904_L001_R1_001	Spain	2005	Horse	Horse	PRJNA226567	SAMN02391283
SRR1218681_L001_R1_001	Belgium	2006	Chicken	Poultry	PRJNA226567	SAMN02391311
SRR1218641_L001_R1_001	Belgium	2006	Chicken	Poultry	PRJNA226567	SAMN02391314
SRR1218639_L001_R1_001	Belgium	2006	Chicken	Poultry	PRJNA226567	SAMN02391315
SRR1218552_L001_R1_001	Belgium	2006	Chicken	Poultry	PRJNA226567	SAMN02391312
SRR1300907_L001_R1_001	Belgium	2006	Chicken	Poultry	PRJNA226567	SAMN02391313
SRR1293419_L001_R1_001	Netherlands	2006	Human	Human	PRJNA226567	SAMN02391246
SRR1303385_L001_R1_001	Netherlands	2007	Cattle	Cattle	PRJNA226392	SAMN02391266
SRR1218678_L001_R1_001	Netherlands	2007	Chicken	Poultry	PRJNA226567	SAMN02391269
SRR1303273_L001_R1_001	Netherlands	2007	Human	Human	PRJNA226373	SAMN02391247
SRR1213147_L001_R1_001	Netherlands	2007	Pig	Pig	PRJNA226567	SAMN02391421
SRR1303289_L001_R1_001	Netherlands	2007	Pig	Pig	PRJNA226548	SAMN02391420
SRR1303292_L001_R1_001	Netherlands	2007	Pig	Pig	PRJNA226391	SAMN02391265
SRR1293393_L001_R1_001	Netherlands	2007	Pig	Pig	PRJNA226567	SAMN02391414
SRR1303552_L001_R1_001	Netherlands	2007	Pig	Pig	PRJNA226544	SAMN02391416
SRR1212966_L001_R1_001	Netherlands	2007	Pig	Pig	PRJNA226567	SAMN02391417
SRR1303561_L001_R1_001	Netherlands	2007	Pig	Pig	PRJNA226546	SAMN02391418
SRR1303559_L001_R1_001	Netherlands	2007	Pig	Pig	PRJNA226547	SAMN02391419
SRR1293561_L001_R1_001	Netherlands	2007	Pig	Pig	PRJNA226567	SAMN02391415
SRR1212978_L001_R1_001	Netherlands	2007	Pig	Pig	PRJNA226567	SAMN02391413
SRR1293505_L001_R1_001	Netherlands	2007	Pig	Pig	PRJNA226567	SAMN02391422
SRR1302880_L001_R1_001	Netherlands	2007	Pig	Pig	PRJNA226551	SAMN02391423
SRR1218550_L001_R1_001	Spain	2007	Pig	Pig	PRJNA226567	SAMN02391275
SRR1212985_L001_R1_001	Belgium	2008	Rat	Rat	PRJNA226567	SAMN02391424
SRR1303242_L001_R1_001	Germany	2008	Cattle	Cattle	PRJNA226495	SAMN02391367
SRR1293667_L001_R1_001	Germany	2008	Cattle	Cattle	PRJNA226567	SAMN02391365
SRR1303556_L001_R1_001	Netherlands	2008	Cattle	Cattle	PRJNA226393	SAMN02391267
SRR1302882_L001_R1_001	Netherlands	2008	Cattle	Cattle	PRJNA226394	SAMN02391268
SRR1303569_L001_R1_001	Netherlands	2008	Chicken	Poultry	PRJNA226396	SAMN02391270
SRR1328325_L001_R1_001	Netherlands	2008	Human	Human	PRJNA228484	SAMN02403977
SRR1329301_L001_R1_001	Netherlands	2008	Human	Human	PRJNA228506	SAMN02403999
SRR1328295_L001_R1_001	Netherlands	2008	Human	Human	PRJNA228509	SAMN02404002
SRR1330218_L001_R1_001	Netherlands	2008	Human	Human	PRJNA228584	SAMN02404076
SRR1326951_L001_R1_001	Netherlands	2008	Human	Human	PRJNA228575	SAMN02404067
SRR1344692_L001_R1_001	Netherlands	2008	Human	Human	PRJNA228576	SAMN02404068
SRR1328332_L001_R1_001	Netherlands	2008	Human	Human	PRJNA228583	SAMN02404075
SRR1342151_L001_R1_001	Netherlands	2008	Human	Human	PRJNA228586	SAMN02404078
SRR1329812_L001_R1_001	Netherlands	2008	Human	Human	PRJNA228599	SAMN02404091
SRR1326979_L001_R1_001	Netherlands	2008	Human	Human	PRJNA228601	SAMN02404093
SRR1303421_L001_R1_001	Netherlands	2008	Human	Human	PRJNA228603	SAMN02404095
SRR1326980_L001_R1_001	Netherlands	2008	Human	Human	PRJNA228548	SAMN02404040
SRR1330269_L001_R1_001	Netherlands	2008	Human	Human	PRJNA228502	SAMN02403995
SRR1329231_L001_R1_001	Netherlands	2008	Human	Human	PRJNA228561	SAMN02404053
SRR1329306_L001_R1_001	Netherlands	2008	Human	Human	PRJNA228492	SAMN02403985
SRR1328188_L001_R1_001	Netherlands	2008	Human	Human	PRJNA228549	SAMN02404041
SRR1326245_L001_R1_001	Netherlands	2008	Human	Human	PRJNA228505	SAMN02403998
SRR1329263_L001_R1_001	Netherlands	2008	Human	Human	PRJNA228515	SAMN02404008
SRR1329274_L001_R1_001	Netherlands	2008	Human	Human	PRJNA228516	SAMN02404009
SRR1326140_L001_R1_001	Netherlands	2008	Human	Human	PRJNA228517	SAMN02404010
SRR1326988_L001_R1_001	Netherlands	2008	Human	Human	PRJNA228526	SAMN02404019
SRR1328329_L001_R1_001	Netherlands	2008	Human	Human	PRJNA228528	SAMN02404020
SRR1530980_L001_R1_001	Netherlands	2008	Human	Human	PRJNA228536	SAMN02404028
SRR1330274_L001_R1_001	Netherlands	2008	Human	Human	PRJNA228483	SAMN02403976
SRR1328326_L001_R1_001	Netherlands	2008	Human	Human	PRJNA228562	SAMN02404054
SRR1326971_L001_R1_001	Netherlands	2008	Human	Human	PRJNA228581	SAMN02404073
SRR1303542_L001_R1_001	Netherlands	2008	Human	Human	PRJNA228582	SAMN02404074
SRR1329267_L001_R1_001	Netherlands	2008	Human	Human	PRJNA228563	SAMN02404055
SRR1326987_L001_R1_001	Netherlands	2008	Human	Human	PRJNA228501	SAMN02403994
SRR1329266_L001_R1_001	Netherlands	2008	Human	Human	PRJNA228507	SAMN02404000
SRR1328302_L001_R1_001	Netherlands	2008	Human	Human	PRJNA228508	SAMN02404001
SRR1326246_L001_R1_001	Netherlands	2008	Human	Human	PRJNA228532	SAMN02404024
SRR1303400_L001_R1_001	Netherlands	2008	Human	Human	PRJNA228585	SAMN02404077
SRR1328314_L001_R1_001	Netherlands	2008	Human	Human	PRJNA228485	SAMN02403978
SRR1330205_L001_R1_001	Netherlands	2008	Human	Human	PRJNA228482	SAMN02403975
SRR1328293_L001_R1_001	Netherlands	2008	Human	Human	PRJNA228570	SAMN02404062
SRR1328172_L001_R1_001	Netherlands	2008	Human	Human	PRJNA228853	SAMN02404343
SRR1328176_L001_R1_001	Netherlands	2008	Human	Human	PRJNA228614	SAMN02404106
SRR1329240_L001_R1_001	Netherlands	2008	Human	Human	PRJNA228615	SAMN02404107
SRR1326244_L001_R1_001	Netherlands	2008	Human	Human	PRJNA228784	SAMN02404274
SRR1330231_L001_R1_001	Netherlands	2008	Human	Human	PRJNA228845	SAMN02404335
SRR1326995_L001_R1_001	Netherlands	2008	Human	Human	PRJNA228846	SAMN02404336
SRR1303415_L001_R1_001	Netherlands	2008	Human	Human	PRJNA228848	SAMN02404338
SRR1328174_L001_R1_001	Netherlands	2008	Human	Human	PRJNA228611	SAMN02404103
SRR1303565_L001_R1_001	Netherlands	2008	Human	Human	PRJNA228852	SAMN02404342
SRR1329298_L001_R1_001	Netherlands	2008	Human	Human	PRJNA228610	SAMN02404102
SRR1330418_L001_R1_001	Netherlands	2008	Human	Human	PRJNA228855	SAMN02404345
SRR1329281_L001_R1_001	Netherlands	2008	Human	Human	PRJNA228856	SAMN02404346
SRR1330249_L001_R1_001	Netherlands	2008	Human	Human	PRJNA228857	SAMN02404347
SRR1330282_L001_R1_001	Netherlands	2008	Human	Human	PRJNA228849	SAMN02404339
SRR1326943_L001_R1_001	Netherlands	2008	Human	Human	PRJNA228594	SAMN02404086
SRR1328311_L001_R1_001	Netherlands	2008	Human	Human	PRJNA228571	SAMN02404063
SRR1330281_L001_R1_001	Netherlands	2008	Human	Human	PRJNA228572	SAMN02404064
SRR1329237_L001_R1_001	Netherlands	2008	Human	Human	PRJNA228573	SAMN02404065
SRR1328275_L001_R1_001	Netherlands	2008	Human	Human	PRJNA228574	SAMN02404066
SRR1328308_L001_R1_001	Netherlands	2008	Human	Human	PRJNA228579	SAMN02404071
SRR1329310_L001_R1_001	Netherlands	2008	Human	Human	PRJNA228580	SAMN02404072
SRR1326966_L001_R1_001	Netherlands	2008	Human	Human	PRJNA228588	SAMN02404080
SRR1329279_L001_R1_001	Netherlands	2008	Human	Human	PRJNA228612	SAMN02404104
SRR1328313_L001_R1_001	Netherlands	2008	Human	Human	PRJNA228591	SAMN02404083
SRR1342147_L001_R1_001	Netherlands	2008	Human	Human	PRJNA228602	SAMN02404094
SRR1330275_L001_R1_001	Netherlands	2008	Human	Human	PRJNA228604	SAMN02404096
SRR1330419_L001_R1_001	Netherlands	2008	Human	Human	PRJNA228605	SAMN02404097
SRR1303582_L001_R1_001	Netherlands	2008	Human	Human	PRJNA228606	SAMN02404098
SRR1328287_L001_R1_001	Netherlands	2008	Human	Human	PRJNA228607	SAMN02404099
SRR1328276_L001_R1_001	Netherlands	2008	Human	Human	PRJNA228608	SAMN02404100
SRR1326954_L001_R1_001	Netherlands	2008	Human	Human	PRJNA228609	SAMN02404101
SRR1328178_L001_R1_001	Netherlands	2008	Human	Human	PRJNA228589	SAMN02404081
SRR1326142_L001_R1_001	Netherlands	2008	Human	Human	PRJNA228569	SAMN02404061
SRR1329834_L001_R1_001	Netherlands	2008	Human	Human	PRJNA228519	SAMN02404012
SRR1218663_L001_R1_001	Netherlands	2008	Human	Human	PRJNA226567	SAMN02391251
SRR1300903_L001_R1_001	Netherlands	2008	Human	Human	PRJNA226567	SAMN02391253
SRR1328301_L001_R1_001	Netherlands	2008	Human	Human	PRJNA228480	SAMN02403973
SRR1330219_L001_R1_001	Netherlands	2008	Human	Human	PRJNA228481	SAMN02403974
SRR1328170_L001_R1_001	Netherlands	2008	Human	Human	PRJNA228551	SAMN02404043
SRR1303537_L001_R1_001	Netherlands	2008	Human	Human	PRJNA228550	SAMN02404042
SRR1328291_L001_R1_001	Netherlands	2008	Human	Human	PRJNA228544	SAMN02404036
SRR1328177_L001_R1_001	Netherlands	2008	Human	Human	PRJNA228553	SAMN02404045
SRR1330233_L001_R1_001	Netherlands	2008	Human	Human	PRJNA228552	SAMN02404044
SRR1330280_L001_R1_001	Netherlands	2008	Human	Human	PRJNA228497	SAMN02403990
SRR1330224_L001_R1_001	Netherlands	2008	Human	Human	PRJNA228486	SAMN02403979
SRR1328309_L001_R1_001	Netherlands	2008	Human	Human	PRJNA228487	SAMN02403980
SRR1329303_L001_R1_001	Netherlands	2008	Human	Human	PRJNA228530	SAMN02404022
SRR1329291_L001_R1_001	Netherlands	2008	Human	Human	PRJNA228488	SAMN02403981
SRR1329276_L001_R1_001	Netherlands	2008	Human	Human	PRJNA228489	SAMN02403982
SRR1326960_L001_R1_001	Netherlands	2008	Human	Human	PRJNA228493	SAMN02403986
SRR1328296_L001_R1_001	Netherlands	2008	Human	Human	PRJNA228494	SAMN02403987
SRR1303563_L001_R1_001	Netherlands	2008	Human	Human	PRJNA228568	SAMN02404060
SRR1330225_L001_R1_001	Netherlands	2008	Human	Human	PRJNA228529	SAMN02404021
SRR1329278_L001_R1_001	Netherlands	2008	Human	Human	PRJNA228535	SAMN02404027
SRR1329246_L001_R1_001	Netherlands	2008	Human	Human	PRJNA228498	SAMN02403991
SRR1330267_L001_R1_001	Netherlands	2008	Human	Human	PRJNA228499	SAMN02403992
SRR1330370_L001_R1_001	Netherlands	2008	Human	Human	PRJNA228500	SAMN02403993
SRR1326994_L001_R1_001	Netherlands	2008	Human	Human	PRJNA228504	SAMN02403997
SRR1328330_L001_R1_001	Netherlands	2008	Human	Human	PRJNA228510	SAMN02404003
SRR1330408_L001_R1_001	Netherlands	2008	Human	Human	PRJNA228511	SAMN02404004
SRR1330414_L001_R1_001	Netherlands	2008	Human	Human	PRJNA228514	SAMN02404007
SRR1328273_L001_R1_001	Netherlands	2008	Human	Human	PRJNA228495	SAMN02403988
SRR1328183_L001_R1_001	Netherlands	2008	Human	Human	PRJNA228557	SAMN02404049
SRR1303401_L001_R1_001	Netherlands	2008	Human	Human	PRJNA228542	SAMN02404034
SRR1303271_L001_R1_001	Netherlands	2008	Human	Human	PRJNA228567	SAMN02404059
SRR1330204_L001_R1_001	Netherlands	2008	Human	Human	PRJNA228566	SAMN02404058
SRR1326981_L001_R1_001	Netherlands	2008	Human	Human	PRJNA228565	SAMN02404057
SRR1303279_L001_R1_001	Netherlands	2008	Human	Human	PRJNA228541	SAMN02404033
SRR1328307_L001_R1_001	Netherlands	2008	Human	Human	PRJNA228540	SAMN02404032
SRR1326199_L001_R1_001	Netherlands	2008	Human	Human	PRJNA228531	SAMN02404023
SRR1328297_L001_R1_001	Netherlands	2008	Human	Human	PRJNA228558	SAMN02404050
SRR1342173_L001_R1_001	Netherlands	2008	Human	Human	PRJNA228534	SAMN02404026
SRR1329839_L001_R1_001	Netherlands	2008	Human	Human	PRJNA228539	SAMN02404031
SRR1326970_L001_R1_001	Netherlands	2008	Human	Human	PRJNA228556	SAMN02404048
SRR1329233_L001_R1_001	Netherlands	2008	Human	Human	PRJNA228555	SAMN02404047
SRR1326969_L001_R1_001	Netherlands	2008	Human	Human	PRJNA228554	SAMN02404046
SRR1330409_L001_R1_001	Netherlands	2008	Human	Human	PRJNA228537	SAMN02404029
SRR1328186_L001_R1_001	Netherlands	2008	Human	Human	PRJNA228543	SAMN02404035
SRR1330229_L001_R1_001	Netherlands	2008	Human	Human	PRJNA228564	SAMN02404056
SRR1218633_L001_R1_001	Netherlands	2008	Human	Human	PRJNA226567	SAMN02391250
SRR1302890_L001_R1_001	Netherlands	2008	Meleagris gallopavo	Meleagris gallopavo	PRJNA226397	SAMN02391271
SRR1218669_L001_R1_001	Netherlands	2008	Pig	Pig	PRJNA226567	SAMN02391272
SRR1303572_L001_R1_001	Netherlands	2008	Rat	Rat	PRJNA226553	SAMN02391425
SRR1303411_L001_R1_001	Netherlands	2008	Rat	Rat	PRJNA226554	SAMN02391426
SRR1303585_L001_R1_001	Netherlands	2008	Rat	Rat	PRJNA226555	SAMN02391427
SRR1303487_L001_R1_001	Spain	2008	Pig	Pig	PRJNA226419	SAMN02391293
SRR1293506_L001_R1_001	Austria	2009	Chicken	Poultry	PRJNA226567	SAMN02391376
SRR1212958_L001_R1_001	Austria	2009	Meleagris gallopavo	Meleagris gallopavo	PRJNA226567	SAMN02391383
SRR1303417_L001_R1_001	China	2009	Cat	Cat	PRJNA226453	SAMN02391325
SRR1303466_L001_R1_001	China	2009	Rat	Rat	PRJNA226455	SAMN02391327
SRR1303628_L001_R1_001	Germany	2009	Cattle	Cattle	PRJNA226494	SAMN02391366
SRR1303413_L001_R1_001	Germany	2009	Chicken	Poultry	PRJNA226474	SAMN02391346
SRR1213850_L001_R1_001	Germany	2009	Chicken	Poultry	PRJNA226567	SAMN02391375
SRR1303576_L001_R1_001	Germany	2009	Chicken	Poultry	PRJNA226505	SAMN02391377
SRR1290876_L001_R1_001	Germany	2009	Meleagris gallopavo	Meleagris gallopavo	PRJNA226567	SAMN02391200
SRR1293610_L001_R1_001	Germany	2009	Meleagris gallopavo	Meleagris gallopavo	PRJNA226567	SAMN02391378
SRR1303499_L001_R1_001	Germany	2009	Meleagris gallopavo	Meleagris gallopavo	PRJNA226521	SAMN02391393
SRR1218683_L001_R1_001	Germany	2009	Meleagris gallopavo	Meleagris gallopavo	PRJNA226567	SAMN02391382
SRR1303479_L001_R1_001	Germany	2009	Meleagris gallopavo	Meleagris gallopavo	PRJNA226508	SAMN02391380
SRR1303474_L001_R1_001	Germany	2009	Meleagris gallopavo	Meleagris gallopavo	PRJNA226509	SAMN02391381
SRR1212984_L001_R1_001	Italy	2009	Meleagris gallopavo	Meleagris gallopavo	PRJNA226567	SAMN02391379
SRR1213075_L001_R1_001	Netherlands	2009	Human	Human	PRJNA228730	SAMN02404220
SRR1342181_L001_R1_001	Netherlands	2009	Human	Human	PRJNA228525	SAMN02404018
SRR1326967_L001_R1_001	Netherlands	2009	Human	Human	PRJNA228639	SAMN02404131
SRR1293504_L001_R1_001	Netherlands	2009	Human	Human	PRJNA226567	SAMN02404222
SRR1326977_L001_R1_001	Netherlands	2009	Human	Human	PRJNA228884	SAMN02404374
SRR1326944_L001_R1_001	Netherlands	2009	Human	Human	PRJNA228621	SAMN02404113
SRR1329311_L001_R1_001	Netherlands	2009	Human	Human	PRJNA228674	SAMN02404166
SRR1328333_L001_R1_001	Netherlands	2009	Human	Human	PRJNA228642	SAMN02404134
SRR1326964_L001_R1_001	Netherlands	2009	Human	Human	PRJNA228643	SAMN02404135
SRR1328316_L001_R1_001	Netherlands	2009	Human	Human	PRJNA228645	SAMN02404137
SRR1202715_L001_R1_001	Netherlands	2009	Human	Human	PRJNA228650	SAMN02404142
SRR1202695_L001_R1_001	Netherlands	2009	Human	Human	PRJNA228651	SAMN02404143
SRR1202723_L001_R1_001	Netherlands	2009	Human	Human	PRJNA228656	SAMN02404148
SRR1329244_L001_R1_001	Netherlands	2009	Human	Human	PRJNA228636	SAMN02404128
SRR1328331_L001_R1_001	Netherlands	2009	Human	Human	PRJNA228673	SAMN02404165
SRR1328305_L001_R1_001	Netherlands	2009	Human	Human	PRJNA228635	SAMN02404127
SRR1293677_L001_R1_001	Netherlands	2009	Human	Human	PRJNA228695	SAMN02404187
SRR1213082_L001_R1_001	Netherlands	2009	Human	Human	PRJNA228701	SAMN02404193
SRR1302887_L001_R1_001	Netherlands	2009	Human	Human	PRJNA228716	SAMN02404206
SRR1213080_L001_R1_001	Netherlands	2009	Human	Human	PRJNA228717	SAMN02404207
SRR1293420_L001_R1_001	Netherlands	2009	Human	Human	PRJNA228720	SAMN02404210
SRR1303275_L001_R1_001	Netherlands	2009	Human	Human	PRJNA228721	SAMN02404211
SRR1293503_L001_R1_001	Netherlands	2009	Human	Human	PRJNA228722	SAMN02404212
SRR1326957_L001_R1_001	Netherlands	2009	Human	Human	PRJNA228668	SAMN02404160
SRR1326976_L001_R1_001	Netherlands	2009	Human	Human	PRJNA228638	SAMN02404130
SRR1293569_L001_R1_001	Netherlands	2009	Human	Human	PRJNA226567	SAMN02404231
SRR1326989_L001_R1_001	Netherlands	2009	Human	Human	PRJNA228623	SAMN02404115
SRR1326982_L001_R1_001	Netherlands	2009	Human	Human	PRJNA228632	SAMN02404124
SRR1212980_L001_R1_001	Netherlands	2009	Human	Human	PRJNA228739	SAMN02404229
SRR1213113_L001_R1_001	Netherlands	2009	Human	Human	PRJNA228755	SAMN02404245
SRR1213114_L001_R1_001	Netherlands	2009	Human	Human	PRJNA228758	SAMN02404248
SRR1326990_L001_R1_001	Netherlands	2009	Human	Human	PRJNA228867	SAMN02404357
SRR1330220_L001_R1_001	Netherlands	2009	Human	Human	PRJNA228876	SAMN02404366
SRR1329277_L001_R1_001	Netherlands	2009	Human	Human	PRJNA228885	SAMN02404375
SRR1303538_L001_R1_001	Netherlands	2009	Human	Human	PRJNA228886	SAMN02404376
SRR1213807_L001_R1_001	Netherlands	2009	Human	Human	PRJNA228740	SAMN02404230
SRR1212987_L001_R1_001	Netherlands	2009	Human	Human	PRJNA228723	SAMN02404213
SRR1293681_L001_R1_001	Netherlands	2009	Human	Human	PRJNA228711	SAMN02404201
SRR1213116_L001_R1_001	Netherlands	2009	Human	Human	PRJNA226567	SAMN02404252
SRR1330208_L001_R1_001	Netherlands	2009	Human	Human	PRJNA228672	SAMN02404164
SRR1303290_L001_R1_001	Netherlands	2009	Human	Human	PRJNA228751	SAMN02404241
SRR1303575_L001_R1_001	Netherlands	2009	Human	Human	PRJNA228631	SAMN02404123
SRR1303494_L001_R1_001	Netherlands	2009	Human	Human	PRJNA228714	SAMN02404204
SRR1303571_L001_R1_001	Netherlands	2009	Human	Human	PRJNA228779	SAMN02404269
SRR1329268_L001_R1_001	Netherlands	2009	Human	Human	PRJNA228660	SAMN02404152
SRR1330416_L001_R1_001	Netherlands	2009	Human	Human	PRJNA228661	SAMN02404153
SRR1202712_L001_R1_001	Netherlands	2009	Human	Human	PRJNA228652	SAMN02404144
SRR1329245_L001_R1_001	Netherlands	2009	Human	Human	PRJNA228634	SAMN02404126
SRR1329229_L001_R1_001	Netherlands	2009	Human	Human	PRJNA228618	SAMN02404110
SRR1329258_L001_R1_001	Netherlands	2009	Human	Human	PRJNA228620	SAMN02404112
SRR1326997_L001_R1_001	Netherlands	2009	Human	Human	PRJNA228624	SAMN02404116
SRR1328184_L001_R1_001	Netherlands	2009	Human	Human	PRJNA228625	SAMN02404117
SRR1326247_L001_R1_001	Netherlands	2009	Human	Human	PRJNA228626	SAMN02404118
SRR1329238_L001_R1_001	Netherlands	2009	Human	Human	PRJNA228627	SAMN02404119
SRR1328318_L001_R1_001	Netherlands	2009	Human	Human	PRJNA228629	SAMN02404121
SRR1329271_L001_R1_001	Netherlands	2009	Human	Human	PRJNA228633	SAMN02404125
SRR1328320_L001_R1_001	Netherlands	2009	Human	Human	PRJNA228522	SAMN02404015
SRR1330264_L001_R1_001	Netherlands	2009	Human	Human	PRJNA228637	SAMN02404129
SRR1328289_L001_R1_001	Netherlands	2009	Human	Human	PRJNA228641	SAMN02404133
SRR1329264_L001_R1_001	Netherlands	2009	Human	Human	PRJNA228644	SAMN02404136
SRR1329280_L001_R1_001	Netherlands	2009	Human	Human	PRJNA228646	SAMN02404138
SRR1326203_L001_R1_001	Netherlands	2009	Human	Human	PRJNA228647	SAMN02404139
SRR1202677_L001_R1_001	Netherlands	2009	Human	Human	PRJNA228648	SAMN02404140
SRR1202653_L001_R1_001	Netherlands	2009	Human	Human	PRJNA228649	SAMN02404141
SRR1328274_L001_R1_001	Netherlands	2009	Human	Human	PRJNA228630	SAMN02404122
SRR1330395_L001_R1_001	Netherlands	2009	Human	Human	PRJNA228524	SAMN02404017
SRR1329223_L001_R1_001	Netherlands	2009	Human	Human	PRJNA228523	SAMN02404016
SRR1302915_L001_R1_001	Netherlands	2009	Human	Human	PRJNA226380	SAMN02391254
SRR1328175_L001_R1_001	Netherlands	2009	Human	Human	PRJNA228520	SAMN02404013
SRR1330260_L001_R1_001	Netherlands	2009	Human	Human	PRJNA228521	SAMN02404014
SRR1293384_L001_R1_001	Netherlands	2009	Human	Human	PRJNA228773	SAMN02404263
SRR1329227_L001_R1_001	Netherlands	2009	Human	Human	PRJNA228880	SAMN02404370
SRR1303557_L001_R1_001	Netherlands	2009	Human	Human	PRJNA228881	SAMN02404371
SRR1326985_L001_R1_001	Netherlands	2009	Human	Human	PRJNA228883	SAMN02404373
SRR1326187_L001_R1_001	Netherlands	2009	Human	Human	PRJNA228888	SAMN02404378
SRR1328327_L001_R1_001	Netherlands	2009	Human	Human	PRJNA228892	SAMN02404382
SRR1326973_L001_R1_001	Netherlands	2009	Human	Human	PRJNA228893	SAMN02404383
SRR1326993_L001_R1_001	Netherlands	2009	Human	Human	PRJNA228875	SAMN02404365
SRR1329225_L001_R1_001	Netherlands	2009	Human	Human	PRJNA228897	SAMN02404387
SRR1330253_L001_R1_001	Netherlands	2009	Human	Human	PRJNA228874	SAMN02404364
SRR1330206_L001_R1_001	Netherlands	2009	Human	Human	PRJNA228860	SAMN02404350
SRR1212974_L001_R1_001	Netherlands	2009	Human	Human	PRJNA228774	SAMN02404264
SRR1212976_L001_R1_001	Netherlands	2009	Human	Human	PRJNA228775	SAMN02404265
SRR1303578_L001_R1_001	Netherlands	2009	Human	Human	PRJNA228776	SAMN02404266
SRR1303299_L001_R1_001	Netherlands	2009	Human	Human	PRJNA228778	SAMN02404268
SRR1307721_L001_R1_001	Netherlands	2009	Human	Human	PRJNA228780	SAMN02404270
SRR1212964_L001_R1_001	Netherlands	2009	Human	Human	PRJNA226567	SAMN02404271
SRR1302885_L001_R1_001	Netherlands	2009	Human	Human	PRJNA228782	SAMN02404272
SRR1329308_L001_R1_001	Netherlands	2009	Human	Human	PRJNA228879	SAMN02404369
SRR1342149_L001_R1_001	Netherlands	2009	Human	Human	PRJNA228859	SAMN02404349
SRR1326315_L001_R1_001	Netherlands	2009	Human	Human	PRJNA228865	SAMN02404355
SRR1330223_L001_R1_001	Netherlands	2009	Human	Human	PRJNA228866	SAMN02404356
SRR1330217_L001_R1_001	Netherlands	2009	Human	Human	PRJNA228868	SAMN02404358
SRR1326956_L001_R1_001	Netherlands	2009	Human	Human	PRJNA228870	SAMN02404360
SRR1326948_L001_R1_001	Netherlands	2009	Human	Human	PRJNA228871	SAMN02404361
SRR1329286_L001_R1_001	Netherlands	2009	Human	Human	PRJNA228872	SAMN02404362
SRR1303498_L001_R1_001	Netherlands	2009	Human	Human	PRJNA228873	SAMN02404363
SRR1328277_L001_R1_001	Netherlands	2009	Human	Human	PRJNA228783	SAMN02404273
SRR1328278_L001_R1_001	Netherlands	2009	Human	Human	PRJNA228894	SAMN02404384
SRR1202666_L001_R1_001	Netherlands	2009	Human	Human	PRJNA228653	SAMN02404145
SRR1303482_L001_R1_001	Netherlands	2009	Human	Human	PRJNA228706	SAMN02404197
SRR1303469_L001_R1_001	Netherlands	2009	Human	Human	PRJNA228692	SAMN02404184
SRR1293394_L001_R1_001	Netherlands	2009	Human	Human	PRJNA228693	SAMN02404185
SRR1293416_L001_R1_001	Netherlands	2009	Human	Human	PRJNA226567	SAMN02404186
SRR1293674_L001_R1_001	Netherlands	2009	Human	Human	PRJNA228696	SAMN02404188
SRR1212968_L001_R1_001	Netherlands	2009	Human	Human	PRJNA228697	SAMN02404189
SRR1293383_L001_R1_001	Netherlands	2009	Human	Human	PRJNA228698	SAMN02404190
SRR1212982_L001_R1_001	Netherlands	2009	Human	Human	PRJNA228699	SAMN02404191
SRR1293392_L001_R1_001	Netherlands	2009	Human	Human	PRJNA228700	SAMN02404192
SRR1293408_L001_R1_001	Netherlands	2009	Human	Human	PRJNA228719	SAMN02404209
SRR1213074_L001_R1_001	Netherlands	2009	Human	Human	PRJNA228705	SAMN02404196
SRR1213081_L001_R1_001	Netherlands	2009	Human	Human	PRJNA228685	SAMN02404177
SRR1212975_L001_R1_001	Netherlands	2009	Human	Human	PRJNA228707	SAMN02404198
SRR1303300_L001_R1_001	Netherlands	2009	Human	Human	PRJNA228772	SAMN02404262
SRR1303277_L001_R1_001	Netherlands	2009	Human	Human	PRJNA228709	SAMN02404200
SRR1213155_L001_R1_001	Netherlands	2009	Human	Human	PRJNA228712	SAMN02404202
SRR1212960_L001_R1_001	Netherlands	2009	Human	Human	PRJNA226567	SAMN02404203
SRR1293411_L001_R1_001	Netherlands	2009	Human	Human	PRJNA228715	SAMN02404205
SRR1293388_L001_R1_001	Netherlands	2009	Human	Human	PRJNA228718	SAMN02404208
SRR1213849_L001_R1_001	Netherlands	2009	Human	Human	PRJNA226567	SAMN02404194
SRR1326955_L001_R1_001	Netherlands	2009	Human	Human	PRJNA228671	SAMN02404163
SRR1202687_L001_R1_001	Netherlands	2009	Human	Human	PRJNA228654	SAMN02404146
SRR1202701_L001_R1_001	Netherlands	2009	Human	Human	PRJNA228655	SAMN02404147
SRR1202704_L001_R1_001	Netherlands	2009	Human	Human	PRJNA228657	SAMN02404149
SRR1326949_L001_R1_001	Netherlands	2009	Human	Human	PRJNA228659	SAMN02404151
SRR1342123_L001_R1_001	Netherlands	2009	Human	Human	PRJNA228662	SAMN02404154
SRR1342166_L001_R1_001	Netherlands	2009	Human	Human	PRJNA228663	SAMN02404155
SRR1326968_L001_R1_001	Netherlands	2009	Human	Human	PRJNA228664	SAMN02404156
SRR1329230_L001_R1_001	Netherlands	2009	Human	Human	PRJNA228665	SAMN02404157
SRR1303539_L001_R1_001	Netherlands	2009	Human	Human	PRJNA228688	SAMN02404180
SRR1328181_L001_R1_001	Netherlands	2009	Human	Human	PRJNA228670	SAMN02404162
SRR1213112_L001_R1_001	Netherlands	2009	Human	Human	PRJNA226567	SAMN02404179
SRR1329272_L001_R1_001	Netherlands	2009	Human	Human	PRJNA228675	SAMN02404167
SRR1293409_L001_R1_001	Netherlands	2009	Human	Human	PRJNA226567	SAMN02404168
SRR1213065_L001_R1_001	Netherlands	2009	Human	Human	PRJNA228679	SAMN02404171
SRR1293609_L001_R1_001	Netherlands	2009	Human	Human	PRJNA226567	SAMN02404172
SRR1213709_L001_R1_001	Netherlands	2009	Human	Human	PRJNA228681	SAMN02404173
SRR1293660_L001_R1_001	Netherlands	2009	Human	Human	PRJNA228682	SAMN02404174
SRR1293629_L001_R1_001	Netherlands	2009	Human	Human	PRJNA228683	SAMN02404175
SRR1293501_L001_R1_001	Netherlands	2009	Human	Human	PRJNA226567	SAMN02404176
SRR1213121_L001_R1_001	Netherlands	2009	Human	Human	PRJNA228708	SAMN02404199
SRR1329235_L001_R1_001	Netherlands	2009	Human	Human	PRJNA228669	SAMN02404161
SRR1302918_L001_R1_001	Netherlands	2009	Human	Human	PRJNA228757	SAMN02404247
SRR1293636_L001_R1_001	Netherlands	2009	Human	Human	PRJNA226567	SAMN02404219
SRR1302883_L001_R1_001	Netherlands	2009	Human	Human	PRJNA228733	SAMN02404223
SRR1303422_L001_R1_001	Netherlands	2009	Human	Human	PRJNA228734	SAMN02404224
SRR1302898_L001_R1_001	Netherlands	2009	Human	Human	PRJNA228735	SAMN02404225
SRR1293608_L001_R1_001	Netherlands	2009	Human	Human	PRJNA226567	SAMN02404227
SRR1293577_L001_R1_001	Netherlands	2009	Human	Human	PRJNA228738	SAMN02404228
SRR1213079_L001_R1_001	Netherlands	2009	Human	Human	PRJNA228742	SAMN02404232
SRR1213072_L001_R1_001	Netherlands	2009	Human	Human	PRJNA228743	SAMN02404233
SRR1293410_L001_R1_001	Netherlands	2009	Human	Human	PRJNA226567	SAMN02404236
SRR1293495_L001_R1_001	Netherlands	2009	Human	Human	PRJNA226567	SAMN02404240
SRR1212959_L001_R1_001	Netherlands	2009	Human	Human	PRJNA228752	SAMN02404242
SRR1303278_L001_R1_001	Netherlands	2009	Human	Human	PRJNA228753	SAMN02404243
SRR1213852_L001_R1_001	Netherlands	2009	Human	Human	PRJNA226567	SAMN02404218
SRR1212981_L001_R1_001	Netherlands	2009	Human	Human	PRJNA228756	SAMN02404246
SRR1303304_L001_R1_001	Netherlands	2009	Human	Human	PRJNA228744	SAMN02404234
SRR1293499_L001_R1_001	Netherlands	2009	Human	Human	PRJNA228759	SAMN02404249
SRR1293498_L001_R1_001	Netherlands	2009	Human	Human	PRJNA226567	SAMN02404250
SRR1302916_L001_R1_001	Netherlands	2009	Human	Human	PRJNA228761	SAMN02404251
SRR1213076_L001_R1_001	Netherlands	2009	Human	Human	PRJNA228763	SAMN02404253
SRR1213119_L001_R1_001	Netherlands	2009	Human	Human	PRJNA228764	SAMN02404254
SRR1293396_L001_R1_001	Netherlands	2009	Human	Human	PRJNA228765	SAMN02404255
SRR1212967_L001_R1_001	Netherlands	2009	Human	Human	PRJNA226567	SAMN02404256
SRR1293379_L001_R1_001	Netherlands	2009	Human	Human	PRJNA228767	SAMN02404257
SRR1302894_L001_R1_001	Netherlands	2009	Human	Human	PRJNA228768	SAMN02404258
SRR1303467_L001_R1_001	Netherlands	2009	Human	Human	PRJNA228769	SAMN02404259
SRR1293508_L001_R1_001	Netherlands	2009	Human	Human	PRJNA226567	SAMN02404260
SRR1293417_L001_R1_001	Netherlands	2009	Human	Human	PRJNA226567	SAMN02404261
SRR1293415_L001_R1_001	Netherlands	2009	Human	Human	PRJNA226567	SAMN02404244
SRR1293418_L001_R1_001	Netherlands	2009	Human	Human	PRJNA226567	SAMN02404216
SRR1213111_L001_R1_001	Netherlands	2009	Human	Human	PRJNA228724	SAMN02404214
SRR1212970_L001_R1_001	Netherlands	2009	Human	Human	PRJNA228725	SAMN02404215
SRR1303639_L001_R1_001	Netherlands	2009	Human	Human	PRJNA228747	SAMN02404237
SRR1293597_L001_R1_001	Netherlands	2009	Human	Human	PRJNA228727	SAMN02404217
SRR1218680_L001_R1_001	Spain	2009	Human	Human	PRJNA226567	SAMN02391302
SRR1303534_L001_R1_001	Spain	2009	Human	Human	PRJNA226423	SAMN02391297
SRR1303630_L001_R1_001	Spain	2009	Human	Human	PRJNA226426	SAMN02391300
SRR1303280_L001_R1_001	Spain	2009	Human	Human	PRJNA226436	SAMN02391309
SRR1303241_L001_R1_001	Spain	2009	Human	Human	PRJNA226427	SAMN02391301
SRR1303480_L001_R1_001	Spain	2009	Human	Human	PRJNA226430	SAMN02391304
SRR1303554_L001_R1_001	Spain	2009	Human	Human	PRJNA226429	SAMN02391303
SRR1303529_L001_R1_001	Spain	2009	Human	Human	PRJNA226424	SAMN02391298
SRR1303282_L001_R1_001	Spain	2009	Human	Human	PRJNA226425	SAMN02391299
SRR1218645_L001_R1_001	Spain	2009	Pig	Pig	PRJNA226567	SAMN02391294
SRR9024758_L001_R1_001	China	2010	Human	Human	PRJNA541525	SAMN11586997
SRR5054931_L001_R1_001	China	2010	Human	Human	PRJNA347471	SAMN05942106
SRR5054967_L001_R1_001	China	2010	Human	Human	PRJNA347471	SAMN05942117
SRR5054912_L001_R1_001	China	2010	Human	Human	PRJNA347471	SAMN05942123
SRR5054902_L001_R1_001	China	2010	Human	Human	PRJNA347471	SAMN05942136
SRR5054929_L001_R1_001	China	2010	Human	Human	PRJNA347471	SAMN05942159
SRR5054950_L001_R1_001	China	2010	Human	Human	PRJNA347471	SAMN05942153
SRR1290873_L001_R1_001	China	2010	Pig	Pig	PRJNA226567	SAMN02391339
SRR1303303_L001_R1_001	China	2010	Rat	Rat	PRJNA226456	SAMN02391328
SRR1218553_L001_R1_001	China	2010	Rat	Rat	PRJNA226567	SAMN02391329
SRR1213068_L001_R1_001	Germany	2010	Chicken	Poultry	PRJNA226567	SAMN02391343
SRR1293496_L001_R1_001	Germany	2010	Chicken	Poultry	PRJNA226567	SAMN02391344
SRR1252014_L001_R1_001	Germany	2010	Chicken	Poultry	PRJNA226567	SAMN02391341
SRR1303270_L001_R1_001	Netherlands	2010	Cattle	Cattle	PRJNA226473	SAMN02391345
SRR1213122_L001_R1_001	Netherlands	2010	Cattle	Cattle	PRJNA226567	SAMN02391342
SRR1302891_L001_R1_001	Netherlands	2010	Cattle	Cattle	PRJNA226480	SAMN02391352
SRR1293624_L001_R1_001	Netherlands	2010	Cattle	Cattle	PRJNA226567	SAMN02391355
SRR1302893_L001_R1_001	Netherlands	2010	Cattle	Cattle	PRJNA226488	SAMN02391360
SRR1293659_L001_R1_001	Netherlands	2010	Cattle	Cattle	PRJNA226567	SAMN02391364
SRR1218640_L001_R1_001	Netherlands	2010	Human	Human	PRJNA226567	SAMN02391257
SRR1293422_L001_R1_001	Netherlands	2010	Human	Human	PRJNA226567	SAMN02391353
SRR1303533_L001_R1_001	Netherlands	2010	Human	Human	PRJNA226484	SAMN02391356
SRR1303564_L001_R1_001	Netherlands	2010	Human	Human	PRJNA226486	SAMN02391358
SRR1303579_L001_R1_001	Netherlands	2010	Human	Human	PRJNA226487	SAMN02391359
SRR1293497_L001_R1_001	Netherlands	2010	Human	Human	PRJNA226567	SAMN02391361
SRR1212977_L001_R1_001	Netherlands	2010	Pig	Pig	PRJNA226567	SAMN02391396
SRR1213066_L001_R1_001	Netherlands	2010	Pig	Pig	PRJNA226567	SAMN02391395
SRR1212983_L001_R1_001	Netherlands	2010	Pig	Pig	PRJNA226567	SAMN02391394
SRR1218677_L001_R1_001	Netherlands	2010	Sheep	Sheep	PRJNA226567	SAMN02391362
SRR1218638_L001_R1_001	Spain	2010	Human	Human	PRJNA226567	SAMN02391273
SRR1303497_L001_R1_001	China	2011	Cat	Cat	PRJNA226454	SAMN02391326
SRR1302892_L001_R1_001	China	2011	Chicken	Poultry	PRJNA226462	SAMN02391334
SRR1303399_L001_R1_001	China	2011	Chicken	Poultry	PRJNA226464	SAMN02391336
SRR1302896_L001_R1_001	China	2011	Chicken	Poultry	PRJNA226463	SAMN02391335
SRR5054964_L001_R1_001	China	2011	Human	Human	PRJNA347471	SAMN05942141
SRR5054903_L001_R1_001	China	2011	Human	Human	PRJNA347471	SAMN05942102
SRR5054926_L001_R1_001	China	2011	Human	Human	PRJNA347471	SAMN05942132
SRR5054906_L001_R1_001	China	2011	Human	Human	PRJNA347471	SAMN05942158
SRR5054961_L001_R1_001	China	2011	Human	Human	PRJNA347471	SAMN05942142
SRR5062006_L001_R1_001	China	2011	Human	Human	PRJNA347471	SAMN05942105
SRR5054938_L001_R1_001	China	2011	Human	Human	PRJNA347471	SAMN05942114
SRR5054932_L001_R1_001	China	2011	Human	Human	PRJNA347471	SAMN05942135
SRR9030009_L001_R1_001	China	2011	Human	Human	PRJNA541939	SAMN11605319
SRR5054907_L001_R1_001	China	2011	Human	Human	PRJNA347471	SAMN05942152
SRR5054956_L001_R1_001	China	2011	Human	Human	PRJNA347471	SAMN05942108
SRR5054970_L001_R1_001	China	2011	Human	Human	PRJNA347471	SAMN05942143
SRR1303391_L001_R1_001	China	2011	Rat	Rat	PRJNA226459	SAMN02391331
SRR1218551_L001_R1_001	China	2011	Rat	Rat	PRJNA226567	SAMN02391332
SRR1293657_L001_R1_001	Denmark	2011	Chicken	Poultry	PRJNA226567	SAMN02391157
SRR1213120_L001_R1_001	Germany	2011	Cattle	Cattle	PRJNA226567	SAMN02391390
SRR1303287_L001_R1_001	Germany	2011	Chicken	Poultry	PRJNA226479	SAMN02391351
SRR1218548_L001_R1_001	Germany	2011	Chicken	Poultry	PRJNA226567	SAMN02391349
SRR1212962_L001_R1_001	Netherlands	2011	Cattle	Cattle	PRJNA226567	SAMN02391350
SRR1329305_L001_R1_001	Netherlands	2011	Human	Human	PRJNA228843	SAMN02404333
SRR1328300_L001_R1_001	Netherlands	2011	Human	Human	PRJNA228813	SAMN02404303
SRR1326958_L001_R1_001	Netherlands	2011	Human	Human	PRJNA228799	SAMN02404289
SRR1303491_L001_R1_001	Netherlands	2011	Human	Human	PRJNA228806	SAMN02404296
SRR1330244_L001_R1_001	Netherlands	2011	Human	Human	PRJNA228810	SAMN02404300
SRR1303632_L001_R1_001	Netherlands	2011	Human	Human	PRJNA228814	SAMN02404304
SRR1330238_L001_R1_001	Netherlands	2011	Human	Human	PRJNA228820	SAMN02404310
SRR1329260_L001_R1_001	Netherlands	2011	Human	Human	PRJNA228824	SAMN02404314
SRR1329241_L001_R1_001	Netherlands	2011	Human	Human	PRJNA228844	SAMN02404334
SRR1303298_L001_R1_001	Netherlands	2011	Human	Human	PRJNA228899	SAMN02404389
SRR1329850_L001_R1_001	Netherlands	2011	Human	Human	PRJNA228807	SAMN02404297
SRR1329228_L001_R1_001	Netherlands	2011	Human	Human	PRJNA228832	SAMN02404322
SRR1330202_L001_R1_001	Netherlands	2011	Human	Human	PRJNA228785	SAMN02404275
SRR1329282_L001_R1_001	Netherlands	2011	Human	Human	PRJNA228826	SAMN02404316
SRR1326945_L001_R1_001	Netherlands	2011	Human	Human	PRJNA228793	SAMN02404283
SRR1329300_L001_R1_001	Netherlands	2011	Human	Human	PRJNA228800	SAMN02404290
SRR1329259_L001_R1_001	Netherlands	2011	Human	Human	PRJNA228801	SAMN02404291
SRR1303570_L001_R1_001	Netherlands	2011	Human	Human	PRJNA228792	SAMN02404282
SRR1330232_L001_R1_001	Netherlands	2011	Human	Human	PRJNA228822	SAMN02404312
SRR1328180_L001_R1_001	Netherlands	2011	Human	Human	PRJNA228809	SAMN02404299
SRR1330422_L001_R1_001	Netherlands	2011	Human	Human	PRJNA228811	SAMN02404301
SRR1330271_L001_R1_001	Netherlands	2011	Human	Human	PRJNA228812	SAMN02404302
SRR1326965_L001_R1_001	Netherlands	2011	Human	Human	PRJNA228815	SAMN02404305
SRR1330216_L001_R1_001	Netherlands	2011	Human	Human	PRJNA228816	SAMN02404306
SRR1330215_L001_R1_001	Netherlands	2011	Human	Human	PRJNA228818	SAMN02404308
SRR1329293_L001_R1_001	Netherlands	2011	Human	Human	PRJNA228805	SAMN02404295
SRR1328189_L001_R1_001	Netherlands	2011	Human	Human	PRJNA228821	SAMN02404311
SRR1303471_L001_R1_001	Netherlands	2011	Human	Human	PRJNA228804	SAMN02404294
SRR1328185_L001_R1_001	Netherlands	2011	Human	Human	PRJNA228825	SAMN02404315
SRR1330424_L001_R1_001	Netherlands	2011	Human	Human	PRJNA228827	SAMN02404317
SRR1303233_L001_R1_001	Netherlands	2011	Human	Human	PRJNA228828	SAMN02404318
SRR1303428_L001_R1_001	Netherlands	2011	Human	Human	PRJNA228830	SAMN02404320
SRR1326950_L001_R1_001	Netherlands	2011	Human	Human	PRJNA228831	SAMN02404321
SRR1326996_L001_R1_001	Netherlands	2011	Human	Human	PRJNA228835	SAMN02404325
SRR1303425_L001_R1_001	Netherlands	2011	Human	Human	PRJNA228836	SAMN02404326
SRR1328190_L001_R1_001	Netherlands	2011	Human	Human	PRJNA228819	SAMN02404309
SRR1329289_L001_R1_001	Netherlands	2011	Human	Human	PRJNA228789	SAMN02404279
SRR1303477_L001_R1_001	Netherlands	2011	Human	Human	PRJNA226385	SAMN02391259
SRR1218676_L001_R1_001	Netherlands	2011	Human	Human	PRJNA226567	SAMN02391260
SRR1326316_L001_R1_001	Netherlands	2011	Human	Human	PRJNA228786	SAMN02404276
SRR1330254_L001_R1_001	Netherlands	2011	Human	Human	PRJNA228808	SAMN02404298
SRR1330243_L001_R1_001	Netherlands	2011	Human	Human	PRJNA228788	SAMN02404278
SRR1302917_L001_R1_001	Netherlands	2011	Human	Human	PRJNA228839	SAMN02404329
SRR1303235_L001_R1_001	Netherlands	2011	Human	Human	PRJNA228790	SAMN02404280
SRR1330398_L001_R1_001	Netherlands	2011	Human	Human	PRJNA228791	SAMN02404281
SRR1330426_L001_R1_001	Netherlands	2011	Human	Human	PRJNA228794	SAMN02404284
SRR1328306_L001_R1_001	Netherlands	2011	Human	Human	PRJNA228795	SAMN02404285
SRR1329290_L001_R1_001	Netherlands	2011	Human	Human	PRJNA228796	SAMN02404286
SRR1303403_L001_R1_001	Netherlands	2011	Human	Human	PRJNA228802	SAMN02404292
SRR1303237_L001_R1_001	Netherlands	2011	Human	Human	PRJNA228803	SAMN02404293
SRR1342117_L001_R1_001	Netherlands	2011	Human	Human	PRJNA228787	SAMN02404277
SRR1303573_L001_R1_001	Netherlands	2011	Human	Human	PRJNA228837	SAMN02404327
SRR1303636_L001_R1_001	Netherlands	2011	Human	Human	PRJNA228906	SAMN02404396
SRR1342131_L001_R1_001	Netherlands	2011	Human	Human	PRJNA228840	SAMN02404330
SRR1326992_L001_R1_001	Netherlands	2011	Human	Human	PRJNA228841	SAMN02404331
SRR1330410_L001_R1_001	Netherlands	2011	Human	Human	PRJNA228842	SAMN02404332
SRR1330401_L001_R1_001	Netherlands	2011	Human	Human	PRJNA228898	SAMN02404388
SRR1330248_L001_R1_001	Netherlands	2011	Human	Human	PRJNA228900	SAMN02404390
SRR1303267_L001_R1_001	Netherlands	2011	Human	Human	PRJNA228902	SAMN02404392
SRR1326986_L001_R1_001	Netherlands	2011	Human	Human	PRJNA228905	SAMN02404395
SRR1330239_L001_R1_001	Netherlands	2011	Human	Human	PRJNA228838	SAMN02404328
SRR1329269_L001_R1_001	Netherlands	2011	Human	Human	PRJNA228903	SAMN02404393
SRR1218555_L001_R1_001	Spain	2011	Horse	Horse	PRJNA226567	SAMN02391284
SRR1303532_L001_R1_001	Spain	2011	Human	Human	PRJNA226434	SAMN02391307
SRR5054977_L001_R1_001	China	2012	Human	Human	PRJNA347471	SAMN05942130
SRR5054971_L001_R1_001	China	2012	Human	Human	PRJNA347471	SAMN05942104
SRR5054922_L001_R1_001	China	2012	Human	Human	PRJNA347471	SAMN05942127
SRR5054953_L001_R1_001	China	2012	Human	Human	PRJNA347471	SAMN05942131
SRR5054945_L001_R1_001	China	2012	Human	Human	PRJNA347471	SAMN05942146
SRR5054966_L001_R1_001	China	2012	Human	Human	PRJNA347471	SAMN05942139
SRR5054975_L001_R1_001	China	2012	Human	Human	PRJNA347471	SAMN05942138
SRR5054915_L001_R1_001	China	2012	Human	Human	PRJNA347471	SAMN05942149
SRR5054939_L001_R1_001	China	2012	Human	Human	PRJNA347471	SAMN05942145
SRR5054911_L001_R1_001	China	2012	Human	Human	PRJNA347471	SAMN05942129
SRR5054942_L001_R1_001	China	2012	Human	Human	PRJNA347471	SAMN05942137
SRR5054916_L001_R1_001	China	2012	Human	Human	PRJNA347471	SAMN05942144
SRR5054913_L001_R1_001	China	2012	Human	Human	PRJNA347471	SAMN05942157
SRR9046753_L001_R1_001	China	2012	Human	Human	PRJNA542130	SAMN11611375
SRR5054924_L001_R1_001	China	2012	Human	Human	PRJNA347471	SAMN05942125
SRR5054910_L001_R1_001	China	2012	Human	Human	PRJNA347471	SAMN05942124
SRR5054930_L001_R1_001	China	2012	Human	Human	PRJNA347471	SAMN05942134
SRR5054973_L001_R1_001	China	2012	Human	Human	PRJNA347471	SAMN05942101
SRR5054920_L001_R1_001	China	2012	Human	Human	PRJNA347471	SAMN05942115
SRR5054908_L001_R1_001	China	2012	Human	Human	PRJNA347471	SAMN05942120
SRR5054976_L001_R1_001	China	2012	Human	Human	PRJNA347471	SAMN05942121
SRR5054952_L001_R1_001	China	2012	Human	Human	PRJNA347471	SAMN05942126
SRR1293412_L001_R1_001	Germany	2012	Cattle	Cattle	PRJNA226567	SAMN02391391
SRR1218674_L001_R1_001	Netherlands	2012	Human	Human	PRJNA226567	SAMN02391264
SRR1218632_L001_R1_001	Netherlands	2012	Human	Human	PRJNA226567	SAMN02391262
SRR1303305_L001_R1_001	Netherlands	2012	Human	Human	PRJNA226389	SAMN02391263
SRR1218544_L001_R1_001	Spain	2012	Human	Human	PRJNA226567	SAMN02391274
SRR1302884_L001_R1_001	Trinidad and Tobago	2012	Human	Human	PRJNA226445	SAMN02391318
SRR10102418_L001_R1_001	Slovenia	2013	Human	Human	PRJNA565108	SAMN12734584
SRR1303478_L001_R1_001	Trinidad and Tobago	2013	Human	Human	PRJNA226443	SAMN02391316
SRR1218549_L001_R1_001	Trinidad and Tobago	2013	Human	Human	PRJNA226567	SAMN02391317
SRR12000040_L001_R1_001	Brazil	2014	Pig	Pig	PRJNA593524	SAMN15214618
SRR9029857_L001_R1_001	Canada	2014	Human	Human	PRJNA541934	SAMN11605219
SRR9025119_L001_R1_001	Canada	2014	Human	Human	PRJNA541558	SAMN11587731
SRR5054965_L001_R1_001	China	2014	Cattle	Cattle	PRJNA347471	SAMN05942168
SRR5054947_L001_R1_001	China	2014	Cattle	Cattle	PRJNA347471	SAMN05942165
SRR5054949_L001_R1_001	China	2014	Cattle	Cattle	PRJNA347471	SAMN05942163
SRR5054968_L001_R1_001	China	2014	Cattle	Cattle	PRJNA347471	SAMN05942167
SRR5054957_L001_R1_001	China	2014	Cattle	Cattle	PRJNA347471	SAMN05942160
SRR5054933_L001_R1_001	China	2014	Cattle	Cattle	PRJNA347471	SAMN05942161
SRR5054919_L001_R1_001	China	2014	Human	Human	PRJNA347471	SAMN05942110
SRR5054958_L001_R1_001	China	2014	Human	Human	PRJNA347471	SAMN05942111
SRR5054969_L001_R1_001	China	2014	Human	Human	PRJNA347471	SAMN05942155
SRR5054921_L001_R1_001	China	2014	Human	Human	PRJNA347471	SAMN05942147
SRR5054909_L001_R1_001	China	2014	Human	Human	PRJNA347471	SAMN05942112
SRR5054974_L001_R1_001	China	2014	Human	Human	PRJNA347471	SAMN05942148
SRR5054936_L001_R1_001	China	2014	Human	Human	PRJNA347471	SAMN05942099
SRR5054972_L001_R1_001	China	2014	Human	Human	PRJNA347471	SAMN05942109
SRR5054948_L001_R1_001	China	2014	Human	Human	PRJNA347471	SAMN05942133
SRR5054954_L001_R1_001	China	2014	Human	Human	PRJNA347471	SAMN05942107
SRR5054914_L001_R1_001	China	2014	Human	Human	PRJNA347471	SAMN05942116
SRR5054962_L001_R1_001	China	2014	Human	Human	PRJNA347471	SAMN05942156
SRR5054927_L001_R1_001	China	2014	Human	Human	PRJNA347471	SAMN05942140
SRR5054918_L001_R1_001	China	2014	Human	Human	PRJNA347471	SAMN05942151
SRR9150090_L001_R1_001	China	2014	Human	Human	PRJNA542129	SAMN11611368
SRR5054904_L001_R1_001	China	2014	Human	Human	PRJNA347471	SAMN05942118
SRR5054941_L001_R1_001	China	2014	Human	Human	PRJNA347471	SAMN05942119
SRR5054940_L001_R1_001	China	2014	Human	Human	PRJNA347471	SAMN05942150
SRR11484007_L001_R1_001	Italy	2014	Human	Human	PRJNA623196	SAMN14541421
SRR11484010_L001_R1_001	Italy	2014	Human	Human	PRJNA623196	SAMN14541418
SRR10102397_L001_R1_001	Slovenia	2014	Cat	Cat	PRJNA565108	SAMN12734560
SRR10102414_L001_R1_001	Slovenia	2014	Human	Human	PRJNA565108	SAMN12734588
SRR10102407_L001_R1_001	Slovenia	2014	Human	Human	PRJNA565108	SAMN12734594
SRR10102396_L001_R1_001	Slovenia	2014	Human	Human	PRJNA565108	SAMN12734561
SRR10102443_L001_R1_001	Slovenia	2014	Human	Human	PRJNA565108	SAMN12734553
SRR10102395_L001_R1_001	Slovenia	2014	Human	Human	PRJNA565108	SAMN12734562
SRR10102412_L001_R1_001	Slovenia	2014	Human	Human	PRJNA565108	SAMN12734590
SRR10102411_L001_R1_001	Slovenia	2014	Human	Human	PRJNA565108	SAMN12734591
SRR10102410_L001_R1_001	Slovenia	2014	Human	Human	PRJNA565108	SAMN12734592
SRR10102409_L001_R1_001	Slovenia	2014	Pig	Pig	PRJNA565108	SAMN12734557
SRR10102398_L001_R1_001	Slovenia	2014	Pig	Pig	PRJNA565108	SAMN12734559
SRR10102420_L001_R1_001	Slovenia	2014	Pig	Pig	PRJNA565108	SAMN12734556
SRR10102399_L001_R1_001	Slovenia	2014	Pig	Pig	PRJNA565108	SAMN12734558
SRR10102442_L001_R1_001	Slovenia	2014	Pig	Pig	PRJNA565108	SAMN12734554
SRR10102431_L001_R1_001	Slovenia	2014	Pig	Pig	PRJNA565108	SAMN12734555
SRR5054944_L001_R1_001	China	2015	Cattle	Cattle	PRJNA347471	SAMN05942172
SRR5054963_L001_R1_001	China	2015	Cattle	Cattle	PRJNA347471	SAMN05942173
SRR5054928_L001_R1_001	China	2015	Cattle	Cattle	PRJNA347471	SAMN05942170
SRR5054943_L001_R1_001	China	2015	Cattle	Cattle	PRJNA347471	SAMN05942171
SRR5054960_L001_R1_001	China	2015	Cattle	Cattle	PRJNA347471	SAMN05942169
SRR5054946_L001_R1_001	China	2015	Cattle	Cattle	PRJNA347471	SAMN05942174
SRR11526871_L001_R1_001	China	2015	Human	Human	PRJNA624723	SAMN14582624
SRR11526872_L001_R1_001	China	2015	Human	Human	PRJNA624723	SAMN14582623
SRR11526863_L001_R1_001	China	2015	Human	Human	PRJNA624723	SAMN14582628
SRR11526860_L001_R1_001	China	2015	Human	Human	PRJNA624723	SAMN14582629
SRR11526837_L001_R1_001	China	2015	Human	Human	PRJNA624723	SAMN14582626
SRR6475660_L001_R1_001	Denmark	2015	Cattle	Cattle	PRJNA430150	SAMN08367610
SRR6475663_L001_R1_001	Denmark	2015	Cattle	Cattle	PRJNA430150	SAMN08367611
SRR6475662_L001_R1_001	Denmark	2015	Cattle	Cattle	PRJNA430150	SAMN08367612
SRR6475659_L001_R1_001	Denmark	2015	Cattle	Cattle	PRJNA430150	SAMN08367613
SRR6475661_L001_R1_001	Denmark	2015	Milk	Cattle	PRJNA430150	SAMN08367609
SRR6475677_L001_R1_001	Denmark	2015	Milk	Cattle	PRJNA430150	SAMN08367602
SRR6475667_L001_R1_001	Denmark	2015	Milk	Cattle	PRJNA430150	SAMN08367606
SRR6475669_L001_R1_001	Denmark	2015	Milk	Cattle	PRJNA430150	SAMN08367600
SRR6475670_L001_R1_001	Denmark	2015	Milk	Cattle	PRJNA430150	SAMN08367599
SRR6475668_L001_R1_001	Denmark	2015	Milk	Cattle	PRJNA430150	SAMN08367601
SRR6475673_L001_R1_001	Denmark	2015	Milk	Cattle	PRJNA430150	SAMN08367596
SRR6475672_L001_R1_001	Denmark	2015	Milk	Cattle	PRJNA430150	SAMN08367597
SRR6475671_L001_R1_001	Denmark	2015	Milk	Cattle	PRJNA430150	SAMN08367598
SRR6475676_L001_R1_001	Denmark	2015	Milk	Cattle	PRJNA430150	SAMN08367603
SRR6475665_L001_R1_001	Denmark	2015	Milk	Cattle	PRJNA430150	SAMN08367604
SRR6475664_L001_R1_001	Denmark	2015	Milk	Cattle	PRJNA430150	SAMN08367605
SRR6475666_L001_R1_001	Denmark	2015	Milk	Cattle	PRJNA430150	SAMN08367608
SRR10102429_L001_R1_001	Slovenia	2015	Barn dust	Barn dust	PRJNA565108	SAMN12734574
SRR10102405_L001_R1_001	Slovenia	2015	Human	Human	PRJNA565108	SAMN12734596
SRR10102422_L001_R1_001	Slovenia	2015	Human	Human	PRJNA565108	SAMN12734581
SRR10102404_L001_R1_001	Slovenia	2015	Human	Human	PRJNA565108	SAMN12734597
SRR10102427_L001_R1_001	Slovenia	2015	Human	Human	PRJNA565108	SAMN12734576
SRR10102426_L001_R1_001	Slovenia	2015	Human	Human	PRJNA565108	SAMN12734577
SRR10102428_L001_R1_001	Slovenia	2015	Human	Human	PRJNA565108	SAMN12734575
SRR10102438_L001_R1_001	Slovenia	2015	Pig	Pig	PRJNA565108	SAMN12734566
SRR10102439_L001_R1_001	Slovenia	2015	Pig	Pig	PRJNA565108	SAMN12734565
SRR10102436_L001_R1_001	Slovenia	2015	Pig	Pig	PRJNA565108	SAMN12734568
SRR10102435_L001_R1_001	Slovenia	2015	Pig	Pig	PRJNA565108	SAMN12734569
SRR10102434_L001_R1_001	Slovenia	2015	Pig	Pig	PRJNA565108	SAMN12734570
SRR10102433_L001_R1_001	Slovenia	2015	Pig	Pig	PRJNA565108	SAMN12734571
SRR10102432_L001_R1_001	Slovenia	2015	Pig	Pig	PRJNA565108	SAMN12734572
SRR10102440_L001_R1_001	Slovenia	2015	Pig	Pig	PRJNA565108	SAMN12734564
SRR10102437_L001_R1_001	Slovenia	2015	Pig	Pig	PRJNA565108	SAMN12734567
SRR10102430_L001_R1_001	Slovenia	2015	Sheep	Sheep	PRJNA565108	SAMN12734573
SRR13267189_L001_R1_001	Belgium	2016	Pig	Pig	PRJNA685956	SAMN17101900
SRR13267214_L001_R1_001	Belgium	2016	Pig	Pig	PRJNA685956	SAMN17101931
SRR13267208_L001_R1_001	Belgium	2016	Pig	Pig	PRJNA685956	SAMN17101926
SRR13267220_L001_R1_001	Belgium	2016	Pig	Pig	PRJNA685956	SAMN17101937
SRR13267204_L001_R1_001	Belgium	2016	Pig	Pig	PRJNA685956	SAMN17101922
SRR13267212_L001_R1_001	Belgium	2016	Pig	Pig	PRJNA685956	SAMN17101903
SRR13267210_L001_R1_001	Belgium	2016	Pig	Pig	PRJNA685956	SAMN17101928
SRR13267223_L001_R1_001	Belgium	2016	Pig	Pig	PRJNA685956	SAMN17101904
SRR13267221_L001_R1_001	Belgium	2016	Pig	Pig	PRJNA685956	SAMN17101938
SRR13267205_L001_R1_001	Belgium	2016	Pig	Pig	PRJNA685956	SAMN17101923
SRR13267185_L001_R1_001	Belgium	2016	Pig	Pig	PRJNA685956	SAMN17101906
SRR13267206_L001_R1_001	Belgium	2016	Pig	Pig	PRJNA685956	SAMN17101924
SRR13267191_L001_R1_001	Belgium	2016	Pig	Pig	PRJNA685956	SAMN17101910
SRR13267187_L001_R1_001	Belgium	2016	Pig	Pig	PRJNA685956	SAMN17101908
SRR13267215_L001_R1_001	Belgium	2016	Pig	Pig	PRJNA685956	SAMN17101932
SRR13267196_L001_R1_001	Belgium	2016	Pig	Pig	PRJNA685956	SAMN17101915
SRR13267202_L001_R1_001	Belgium	2016	Pig	Pig	PRJNA685956	SAMN17101920
SRR13267217_L001_R1_001	Belgium	2016	Pig	Pig	PRJNA685956	SAMN17101934
SRR13267197_L001_R1_001	Belgium	2016	Pig	Pig	PRJNA685956	SAMN17101916
SRR13267186_L001_R1_001	Belgium	2016	Pig	Pig	PRJNA685956	SAMN17101907
SRR13267195_L001_R1_001	Belgium	2016	Pig	Pig	PRJNA685956	SAMN17101914
SRR13267203_L001_R1_001	Belgium	2016	Pig	Pig	PRJNA685956	SAMN17101921
SRR13267222_L001_R1_001	Belgium	2016	Pig	Pig	PRJNA685956	SAMN17101939
SRR13267194_L001_R1_001	Belgium	2016	Pig	Pig	PRJNA685956	SAMN17101913
SRR13267190_L001_R1_001	Belgium	2016	Pig	Pig	PRJNA685956	SAMN17101901
SRR13267209_L001_R1_001	Belgium	2016	Pig	Pig	PRJNA685956	SAMN17101927
SRR13267201_L001_R1_001	Belgium	2016	Pig	Pig	PRJNA685956	SAMN17101902
SRR13267224_L001_R1_001	Belgium	2016	Pig	Pig	PRJNA685956	SAMN17101905
SRR13267200_L001_R1_001	Belgium	2016	Pig	Pig	PRJNA685956	SAMN17101919
SRR13267219_L001_R1_001	Belgium	2016	Pig	Pig	PRJNA685956	SAMN17101936
SRR13267211_L001_R1_001	Belgium	2016	Pig	Pig	PRJNA685956	SAMN17101929
SRR11526856_L001_R1_001	China	2016	Human	Human	PRJNA624723	SAMN14582632
SRR11526853_L001_R1_001	China	2016	Human	Human	PRJNA624723	SAMN14582638
SRR11526855_L001_R1_001	China	2016	Human	Human	PRJNA624723	SAMN14582636
SRR11526852_L001_R1_001	China	2016	Human	Human	PRJNA624723	SAMN14582639
SRR11526850_L001_R1_001	China	2016	Human	Human	PRJNA624723	SAMN14582641
SRR11526849_L001_R1_001	China	2016	Human	Human	PRJNA624723	SAMN14582642
SRR11526857_L001_R1_001	China	2016	Human	Human	PRJNA624723	SAMN14582635
SRR11526854_L001_R1_001	China	2016	Human	Human	PRJNA624723	SAMN14582637
SRR9046752_L001_R1_001	China	2016	Human	Human	PRJNA542130	SAMN11611370
SRR9046751_L001_R1_001	China	2016	Human	Human	PRJNA542130	SAMN11611369
SRR9046749_L001_R1_001	China	2016	Human	Human	PRJNA542130	SAMN11611371
SRR9046754_L001_R1_001	China	2016	Human	Human	PRJNA542130	SAMN11611376
SRR9046757_L001_R1_001	China	2016	Human	Human	PRJNA542130	SAMN11611377
SRR11526859_L001_R1_001	China	2016	Human	Human	PRJNA624723	SAMN14582630
SRR11526858_L001_R1_001	China	2016	Human	Human	PRJNA624723	SAMN14582631
SRR11526870_L001_R1_001	China	2016	Human	Human	PRJNA624723	SAMN14582633
SRR11526869_L001_R1_001	China	2016	Human	Human	PRJNA624723	SAMN14582634
SRR15903563_L001_R1_001	France	2016	Cat	Cat	PRJNA763220	SAMN21435893
SRR12999993_L001_R1_001	Italy	2016	Human	Human	PRJNA675099	SAMN16688055
SRR12999994_L001_R1_001	Italy	2016	Human	Human	PRJNA675099	SAMN16688054
SRR10102424_L001_R1_001	Slovenia	2016	Barn dust	Barn dust	PRJNA565108	SAMN12734579
SRR10102425_L001_R1_001	Slovenia	2016	Barn dust	Barn dust	PRJNA565108	SAMN12734578
SRR10102421_L001_R1_001	Slovenia	2016	Barn dust	Barn dust	PRJNA565108	SAMN12734582
SRR10102419_L001_R1_001	Slovenia	2016	Human	Human	PRJNA565108	SAMN12734583
SRR10102423_L001_R1_001	Slovenia	2016	Human	Human	PRJNA565108	SAMN12734580
SRR10102416_L001_R1_001	Slovenia	2016	Human	Human	PRJNA565108	SAMN12734586
SRR10102415_L001_R1_001	Slovenia	2016	Human	Human	PRJNA565108	SAMN12734587
SRR10102403_L001_R1_001	Slovenia	2016	Human	Human	PRJNA565108	SAMN12734598
SRR10102402_L001_R1_001	Slovenia	2016	Human	Human	PRJNA565108	SAMN12734599
SRR10102401_L001_R1_001	Slovenia	2016	Human	Human	PRJNA565108	SAMN12734600
SRR10102400_L001_R1_001	Slovenia	2016	Human	Human	PRJNA565108	SAMN12734601
SRR10102417_L001_R1_001	Slovenia	2016	Pig	Pig	PRJNA565108	SAMN12734585
SRR11526844_L001_R1_001	China	2017	Human	Human	PRJNA624723	SAMN14582646
SRR11526832_L001_R1_001	China	2017	Human	Human	PRJNA624723	SAMN14582657
SRR11526842_L001_R1_001	China	2017	Human	Human	PRJNA624723	SAMN14582648
SRR11526843_L001_R1_001	China	2017	Human	Human	PRJNA624723	SAMN14582647
SRR11526838_L001_R1_001	China	2017	Human	Human	PRJNA624723	SAMN14582652
SRR11526833_L001_R1_001	China	2017	Human	Human	PRJNA624723	SAMN14582656
SRR11526839_L001_R1_001	China	2017	Human	Human	PRJNA624723	SAMN14582651
SRR11526846_L001_R1_001	China	2017	Human	Human	PRJNA624723	SAMN14582644
SRR11526847_L001_R1_001	China	2017	Human	Human	PRJNA624723	SAMN14582643
SRR11526845_L001_R1_001	China	2017	Human	Human	PRJNA624723	SAMN14582645
SRR11526841_L001_R1_001	China	2017	Human	Human	PRJNA624723	SAMN14582649
SRR11526840_L001_R1_001	China	2017	Human	Human	PRJNA624723	SAMN14582650
SRR11526836_L001_R1_001	China	2017	Human	Human	PRJNA624723	SAMN14582653
SRR11526835_L001_R1_001	China	2017	Human	Human	PRJNA624723	SAMN14582654
SRR11526831_L001_R1_001	China	2017	Human	Human	PRJNA624723	SAMN14582658
SRR11526829_L001_R1_001	China	2017	Human	Human	PRJNA624723	SAMN14582660
SRR7825594_L001_R1_001	Czech Republic	2017	Human	Human	PRJNA489800	SAMN09989506
SRR15903568_L001_R1_001	France	2017	Cattle	Cattle	PRJNA763220	SAMN21435889
SRR15903561_L001_R1_001	France	2017	Dog	Dog	PRJNA763220	SAMN21435894
SRR15903554_L001_R1_001	France	2017	Dog	Dog	PRJNA763220	SAMN21435901
SRR15903582_L001_R1_001	France	2017	Dog	Dog	PRJNA763220	SAMN21435876
SRR15903583_L001_R1_001	France	2017	Goat	Goat	PRJNA763220	SAMN21435871
SRR15903573_L001_R1_001	France	2017	Horse	Horse	PRJNA763220	SAMN21435885
SRR15903572_L001_R1_001	France	2017	Horse	Horse	PRJNA763220	SAMN21435884
SRR7825589_L001_R1_001	Germany	2017	Poultry	Poultry	PRJNA489800	SAMN09989509
SRR7825592_L001_R1_001	Poland	2017	Poultry	Poultry	PRJNA489800	SAMN09989508
SRR9026203_L001_R1_001	Australia	2018	Human	Human	PRJNA541589	SAMN11601957
SRR9026204_L001_R1_001	Australia	2018	Human	Human	PRJNA541589	SAMN11601960
SRR9026202_L001_R1_001	Australia	2018	Human	Human	PRJNA541589	SAMN11601958
SRR11526821_L001_R1_001	China	2018	Human	Human	PRJNA624723	SAMN14582667
SRR11526866_L001_R1_001	China	2018	Human	Human	PRJNA624723	SAMN14582670
SRR11526868_L001_R1_001	China	2018	Human	Human	PRJNA624723	SAMN14582668
SRR11526828_L001_R1_001	China	2018	Human	Human	PRJNA624723	SAMN14582661
SRR11526827_L001_R1_001	China	2018	Human	Human	PRJNA624723	SAMN14582662
SRR11526825_L001_R1_001	China	2018	Human	Human	PRJNA624723	SAMN14582663
SRR11526824_L001_R1_001	China	2018	Human	Human	PRJNA624723	SAMN14582664
SRR11526823_L001_R1_001	China	2018	Human	Human	PRJNA624723	SAMN14582665
SRR15903552_L001_R1_001	France	2018	Bird	Bird	PRJNA763220	SAMN21435903
SRR15903550_L001_R1_001	France	2018	Cat	Cat	PRJNA763220	SAMN21435904
SRR15903555_L001_R1_001	France	2018	Cattle	Cattle	PRJNA763220	SAMN21435874
SRR15903566_L001_R1_001	France	2018	Cattle	Cattle	PRJNA763220	SAMN21435873
SRR15903547_L001_R1_001	France	2018	Dog	Dog	PRJNA763220	SAMN21435908
SRR15903551_L001_R1_001	France	2018	Dog	Dog	PRJNA763220	SAMN21435905
SRR15903581_L001_R1_001	France	2018	Dog	Dog	PRJNA763220	SAMN21435877
SRR15903571_L001_R1_001	France	2018	Dog	Dog	PRJNA763220	SAMN21435886
SRR15903556_L001_R1_001	France	2018	Goat	Goat	PRJNA763220	SAMN21435900
SRR15903578_L001_R1_001	France	2018	Horse	Horse	PRJNA763220	SAMN21435880
SRR15903576_L001_R1_001	France	2018	Horse	Horse	PRJNA763220	SAMN21435881
SRR11109893_L001_R1_001	Italy	2018	Human	Human	PRJNA607440	SAMN14133906
SRR11109857_L001_R1_001	Italy	2018	Human	Human	PRJNA607440	SAMN14133947
SRR11109881_L001_R1_001	Italy	2018	Human	Human	PRJNA607440	SAMN14133908
SRR11109858_L001_R1_001	Italy	2018	Human	Human	PRJNA607440	SAMN14133946
SRR11109879_L001_R1_001	Italy	2018	Pig	Pig	PRJNA607440	SAMN14133927
SRR11109845_L001_R1_001	Italy	2018	Pig	Pig	PRJNA607440	SAMN14133958
SRR11109892_L001_R1_001	Italy	2018	Pig	Pig	PRJNA607440	SAMN14133907
SRR11109849_L001_R1_001	Italy	2018	Pig	Pig	PRJNA607440	SAMN14133955
SRR11109863_L001_R1_001	Italy	2018	Pig	Pig	PRJNA607440	SAMN14133942
SRR9200087_L001_R1_001	Italy	2018	Pig	Pig	PRJNA546229	SAMN11954856
SRR11109861_L001_R1_001	Italy	2018	Pig	Pig	PRJNA607440	SAMN14133944
SRR11109884_L001_R1_001	Italy	2018	Pig	Pig	PRJNA607440	SAMN14133923
SRR9200088_L001_R1_001	Italy	2018	Pig	Pig	PRJNA546229	SAMN11954855
SRR11109864_L001_R1_001	Italy	2018	Pig	Pig	PRJNA607440	SAMN14133941
SRR11109872_L001_R1_001	Italy	2018	Pig	Pig	PRJNA607440	SAMN14133934
SRR11109878_L001_R1_001	Italy	2018	Pig	Pig	PRJNA607440	SAMN14133928
SRR9200081_L001_R1_001	Italy	2018	Pig	Pig	PRJNA546229	SAMN11954862
SRR11109869_L001_R1_001	Italy	2018	Pig	Pig	PRJNA607440	SAMN14133936
SRR11109874_L001_R1_001	Italy	2018	Pig	Pig	PRJNA607440	SAMN14133932
SRR11109875_L001_R1_001	Italy	2018	Pig	Pig	PRJNA607440	SAMN14133931
SRR9200083_L001_R1_001	Italy	2018	Pig	Pig	PRJNA546229	SAMN11954860
SRR11109883_L001_R1_001	Italy	2018	Pig	Pig	PRJNA607440	SAMN14133924
SRR11109854_L001_R1_001	Italy	2018	Pig	Pig	PRJNA607440	SAMN14133950
SRR11109873_L001_R1_001	Italy	2018	Pig	Pig	PRJNA607440	SAMN14133933
SRR11109841_L001_R1_001	Italy	2018	Pig	Pig	PRJNA607440	SAMN14133962
SRR11109853_L001_R1_001	Italy	2018	Pig	Pig	PRJNA607440	SAMN14133951
SRR15903560_L001_R1_001	France	2019	Cat	Cat	PRJNA763220	SAMN21435896
SRR15903538_L001_R1_001	France	2019	Cat	Cat	PRJNA763220	SAMN21435916
SRR15903558_L001_R1_001	France	2019	Cat	Cat	PRJNA763220	SAMN21435898
SRR15903557_L001_R1_001	France	2019	Cat	Cat	PRJNA763220	SAMN21435899
SRR15903562_L001_R1_001	France	2019	Cat	Cat	PRJNA763220	SAMN21435895
SRR15903537_L001_R1_001	France	2019	Cat	Cat	PRJNA763220	SAMN21435917
SRR15903541_L001_R1_001	France	2019	Cattle	Cattle	PRJNA763220	SAMN21435913
SRR15903539_L001_R1_001	France	2019	Cattle	Cattle	PRJNA763220	SAMN21435914
SRR15903559_L001_R1_001	France	2019	Dog	Dog	PRJNA763220	SAMN21435897
SRR15903580_L001_R1_001	France	2019	Dog	Dog	PRJNA763220	SAMN21435878
SRR15903575_L001_R1_001	France	2019	Horse	Horse	PRJNA763220	SAMN21435882
SRR15903570_L001_R1_001	France	2019	Horse	Horse	PRJNA763220	SAMN21435887
SRR15903569_L001_R1_001	France	2019	Horse	Horse	PRJNA763220	SAMN21435888
SRR1218543_L001_R1_001	Netherlands	2007	Human	Human	PRJNA226567	SAMN02391249
SRR11484012_L001_R1_001	Italy	2014	Human	Human	PRJNA623196	SAMN14541416
SRR9200085_L001_R1_001	Italy	2018	Pig	Pig	PRJNA546229	SAMN11954858
SRR5054925_L001_R1_001	China	2014	Human	Human	PRJNA347471	SAMN05942100
SRR6475675_L001_R1_001	Denmark	2015	Milk	Cattle	PRJNA430150	SAMN08367594
SRR6475674_L001_R1_001	Denmark	2015	Milk	Cattle	PRJNA430150	SAMN08367595
SRR11109843_L001_R1_001	Italy	2018	Human	Human	PRJNA607440	SAMN14133960
SRR1328299_L001_R1_001	Netherlands	2008	Human	Human	PRJNA228559	SAMN02404051
SRR1342174_L001_R1_001	Netherlands	2009	Human	Human	PRJNA228616	SAMN02404108
SRR11109886_L001_R1_001	Italy	2018	Human	Human	PRJNA607440	SAMN14133921
SRR9200086_L001_R1_001	Italy	2018	Pig	Pig	PRJNA546229	SAMN11954857
SRR1302888_L001_R1_001	Netherlands	2007	Human	Human	PRJNA226374	SAMN02391248
SRR1213187_L001_R1_001	Germany	2011	Chicken	Poultry	PRJNA226567	SAMN02391348
SRR11484009_L001_R1_001	Italy	2013	Cattle	Cattle	PRJNA623196	SAMN14541419
SRR9141411_L001_R1_001	China	2014	Human	Human	PRJNA541965	SAMN11605646
SRR1303492_L001_R1_001	Netherlands	2010	Cattle	Cattle	PRJNA226482	SAMN02391354
SRR10102441_L001_R1_001	Slovenia	2014	Human	Human	PRJNA565108	SAMN12734563
SRR1329242_L001_R1_001	Netherlands	2008	Human	Human	PRJNA228490	SAMN02403983
SRR1330404_L001_R1_001	Netherlands	2008	Human	Human	PRJNA228496	SAMN02403989
SRR1326939_L001_R1_001	Netherlands	2008	Human	Human	PRJNA228613	SAMN02404105
SRR1329302_L001_R1_001	Netherlands	2008	Human	Human	PRJNA228518	SAMN02404011
SRR1330212_L001_R1_001	Netherlands	2008	Human	Human	PRJNA228545	SAMN02404037
SRR1213077_L001_R1_001	Netherlands	2009	Human	Human	PRJNA226567	SAMN02404181
SRR1212979_L001_R1_001	Netherlands	2009	Human	Human	PRJNA228690	SAMN02404182
SRR1212961_L001_R1_001	Netherlands	2009	Human	Human	PRJNA228748	SAMN02404238
SRR1213083_L001_R1_001	Netherlands	2009	Human	Human	PRJNA228749	SAMN02404239
SRR1329236_L001_R1_001	Netherlands	2011	Human	Human	PRJNA228833	SAMN02404323
SRR1330259_L001_R1_001	Netherlands	2011	Human	Human	PRJNA228834	SAMN02404324
SRR13267207_L001_R1_001	Belgium	2016	Pig	Pig	PRJNA685956	SAMN17101925
SRR5054937_L001_R1_001	China	2010	Human	Human	PRJNA347471	SAMN05942128
SRR11526834_L001_R1_001	China	2017	Human	Human	PRJNA624723	SAMN14582655
SRR11109846_L001_R1_001	Italy	2018	Human	Human	PRJNA607440	SAMN14133957
SRR11109877_L001_R1_001	Italy	2018	Pig	Pig	PRJNA607440	SAMN14133929
SRR9200082_L001_R1_001	Italy	2018	Human	Human	PRJNA546229	SAMN11954861
SRR11109838_L001_R1_001	Italy	2018	Pig	Pig	PRJNA607440	SAMN14133914
SRR11109880_L001_R1_001	Italy	2018	Pig	Pig	PRJNA607440	SAMN14133926
SRR11109860_L001_R1_001	Italy	2018	Pig	Pig	PRJNA607440	SAMN14133945
SRR11109851_L001_R1_001	Italy	2018	Pig	Pig	PRJNA607440	SAMN14133953
SRR11109888_L001_R1_001	Italy	2018	Pig	Pig	PRJNA607440	SAMN14133919
SRR11109871_L001_R1_001	Italy	2018	Pig	Pig	PRJNA607440	SAMN14133935
SRR11109840_L001_R1_001	Italy	2018	Pig	Pig	PRJNA607440	SAMN14133912
SRR11109891_L001_R1_001	Italy	2018	Pig	Pig	PRJNA607440	SAMN14133916
SRR11109850_L001_R1_001	Italy	2018	Pig	Pig	PRJNA607440	SAMN14133954
SRR15903574_L001_R1_001	France	2019	Horse	Horse	PRJNA763220	SAMN21435883
SRR1328192_L001_R1_001	Netherlands	2008	Human	Human	PRJNA228560	SAMN02404052
SRR1326940_L001_R1_001	Netherlands	2009	Human	Human	PRJNA228617	SAMN02404109
SRR1326145_L001_R1_001	Netherlands	2009	Human	Human	PRJNA228666	SAMN02404158
SRR1329261_L001_R1_001	Netherlands	2009	Human	Human	PRJNA228667	SAMN02404159
SRR11109837_L001_R1_001	Italy	2018	Pig	Pig	PRJNA607440	SAMN14133915
SRR11109876_L001_R1_001	Italy	2018	Pig	Pig	PRJNA607440	SAMN14133930
SRR9200084_L001_R1_001	Italy	2018	Pig	Pig	PRJNA546229	SAMN11954859
SRR1303577_L001_R1_001	Netherlands	2009	Human	Human	PRJNA228882	SAMN02404372
SRR1326204_L001_R1_001	Netherlands	2009	Human	Human	PRJNA228895	SAMN02404385
SRR1329273_L001_R1_001	Netherlands	2009	Human	Human	PRJNA228896	SAMN02404386
SRR1302881_L001_R1_001	Netherlands	2010	Horse	Horse	PRJNA226491	SAMN02391363
SRR13267199_L001_R1_001	Belgium	2016	Pig	Pig	PRJNA685956	SAMN17101918
SRR13267216_L001_R1_001	Belgium	2016	Pig	Pig	PRJNA685956	SAMN17101933
SRR15903553_L001_R1_001	France	2017	Dog	Dog	PRJNA763220	SAMN21435902
SRR11109865_L001_R1_001	Italy	2018	Pig	Pig	PRJNA607440	SAMN14133940
SRR11109859_L001_R1_001	Italy	2018	Pig	Pig	PRJNA607440	SAMN14133910
SRR11109839_L001_R1_001	Italy	2018	Pig	Pig	PRJNA607440	SAMN14133913
SRR11109868_L001_R1_001	Italy	2018	Pig	Pig	PRJNA607440	SAMN14133937
SRR11109855_L001_R1_001	Italy	2018	Pig	Pig	PRJNA607440	SAMN14133949
SRR1326938_L001_R1_001	Netherlands	2008	Human	Human	PRJNA228533	SAMN02404025
SRR1326975_L001_R1_001	Netherlands	2009	Human	Human	PRJNA226567	SAMN02404120
SRR11484013_L001_R1_001	Italy	2013	Cattle	Cattle	PRJNA623196	SAMN14541415
SRR11526848_L001_R1_001	China	2015	Human	Human	PRJNA624723	SAMN14582625
SRR11526826_L001_R1_001	China	2015	Human	Human	PRJNA624723	SAMN14582627
SRR13267192_L001_R1_001	Belgium	2016	Pig	Pig	PRJNA685956	SAMN17101911
SRR15903577_L001_R1_001	France	2017	Cattle	Cattle	PRJNA763220	SAMN21435872
SRR9200089_L001_R1_001	Italy	2018	Human	Human	PRJNA546229	SAMN11954854
SRR11109890_L001_R1_001	Italy	2018	Pig	Pig	PRJNA607440	SAMN14133917
SRR11109856_L001_R1_001	Italy	2018	Pig	Pig	PRJNA607440	SAMN14133948
SRR5054951_L001_R1_001	China	2011	Human	Human	PRJNA347471	SAMN05942154
SRR11109848_L001_R1_001	Italy	2018	Human	Human	PRJNA607440	SAMN14133911
SRR11109885_L001_R1_001	Italy	2018	Pig	Pig	PRJNA607440	SAMN14133922
SRR11109866_L001_R1_001	Italy	2018	Pig	Pig	PRJNA607440	SAMN14133939
SRR1326972_L001_R1_001	Netherlands	2008	Human	Human	PRJNA228854	SAMN02404344
SRR1303236_L001_R1_001	China	2011	Rat	Rat	PRJNA226461	SAMN02391333
SRR1329296_L001_R1_001	Netherlands	2011	Human	Human	PRJNA228829	SAMN02404319
SRR9046755_L001_R1_001	China	2016	Human	Human	PRJNA542130	SAMN11611373
SRR9046750_L001_R1_001	China	2016	Human	Human	PRJNA542130	SAMN11611372
SRR11109862_L001_R1_001	Italy	2018	Pig	Pig	PRJNA607440	SAMN14133943
SRR11484011_L001_R1_001	Italy	2013	Cattle	Cattle	PRJNA623196	SAMN14541417
SRR1326983_L001_R1_001	Netherlands	2008	Human	Human	PRJNA228503	SAMN02403996
SRR1326959_L001_R1_001	Netherlands	2008	Human	Human	PRJNA228491	SAMN02403984
SRR1326947_L001_R1_001	Netherlands	2008	Human	Human	PRJNA228512	SAMN02404005
SRR1330234_L001_R1_001	Netherlands	2008	Human	Human	PRJNA228513	SAMN02404006
SRR1212969_L001_R1_001	Netherlands	2009	Human	Human	PRJNA226567	SAMN02404169
SRR1326183_L001_R1_001	Netherlands	2009	Human	Human	PRJNA228622	SAMN02404114
SRR1293509_L001_R1_001	Netherlands	2009	Human	Human	PRJNA228678	SAMN02404170
SRR9025065_L001_R1_001	China	2010	Human	Human	PRJNA541553	SAMN11587681
SRR9025137_L001_R1_001	Canada	2014	Human	Human	PRJNA541561	SAMN11587736
SRR15903565_L001_R1_001	France	2015	Cat	Cat	PRJNA763220	SAMN21435891
SRR11484008_L001_R1_001	Italy	2013	Cattle	Cattle	PRJNA623196	SAMN14541420
SRR11109847_L001_R1_001	Italy	2018	Human	Human	PRJNA607440	SAMN14133956
SRR11109887_L001_R1_001	Italy	2018	Pig	Pig	PRJNA607440	SAMN14133920
SRR11109852_L001_R1_001	Italy	2018	Pig	Pig	PRJNA607440	SAMN14133952
SRR1213839_L001_R1_001	Netherlands	2009	Human	Human	PRJNA228736	SAMN02404226
SRR1326991_L001_R1_001	Netherlands	2011	Human	Human	PRJNA228817	SAMN02404307
SRR5054917_L001_R1_001	China	2012	Human	Human	PRJNA347471	SAMN05942103
SRR13267193_L001_R1_001	Belgium	2016	Pig	Pig	PRJNA685956	SAMN17101912
SRR1302897_L001_R1_001	Netherlands	2012	Human	Human	PRJNA226387	SAMN02391261
SRR15903567_L001_R1_001	France	2014	Horse	Horse	PRJNA763220	SAMN21435890
SRR15903544_L001_R1_001	France	2017	Dog	Dog	PRJNA763220	SAMN21435875
SRR11109870_L001_R1_001	Italy	2018	Pig	Pig	PRJNA607440	SAMN14133909
SRR15903579_L001_R1_001	France	2019	Dog	Dog	PRJNA763220	SAMN21435879
SRR11109889_L001_R1_001	Italy	2018	Pig	Pig	PRJNA607440	SAMN14133918
SRR11109867_L001_R1_001	Italy	2018	Human	Human	PRJNA607440	SAMN14133938
SRR11109882_L001_R1_001	Italy	2018	Pig	Pig	PRJNA607440	SAMN14133925
SRR9200090_L001_R1_001	Italy	2018	Human	Human	PRJNA546229	SAMN11954853
SRR11109844_L001_R1_001	Italy	2018	Pig	Pig	PRJNA607440	SAMN14133959
SRR11109842_L001_R1_001	Italy	2018	Human	Human	PRJNA607440	SAMN14133961
SRR1303631_L001_R1_001	Netherlands	2010	Cattle	Cattle	PRJNA226485	SAMN02391357
SRR11526851_L001_R1_001	China	2016	Human	Human	PRJNA624723	SAMN14582640
SRR11526822_L001_R1_001	China	2018	Human	Human	PRJNA624723	SAMN14582666
SRR11526867_L001_R1_001	China	2018	Human	Human	PRJNA624723	SAMN14582669

## Sheet: Table S2
Table S2 Host-exclusive genes.
Predictive gene	Barn dust	Bird	Cat	Cattle	Dog	Goat	Horse	Human	Meleagris gallopavo	Pig	Poultry	Rat	Sheep
abh	0	0	0	0	0	0	0	1	0	0	0	0	0
accB_3	0	0	0	0	0	0	0	0	0	1	0	0	0
accD_2	0	0	0	0	0	0	0	1	0	0	0	0	0
accD_3	0	0	0	0	0	0	0	1	0	0	0	0	0
ackA_2	0	0	0	0	0	0	0	1	0	0	0	0	0
acpA	0	0	0	0	0	0	0	1	0	0	0	0	0
acpP_2	0	0	0	0	0	0	0	0	0	1	0	0	0
acsA_3	0	0	0	0	0	0	0	0	0	1	0	0	0
adcR	0	0	0	0	0	0	0	1	0	0	0	0	0
addA_2	0	0	0	0	0	0	0	1	0	0	0	0	0
adhE_2	0	0	0	0	0	0	0	1	0	0	0	0	0
ahpC_2	0	0	0	0	0	0	0	1	0	0	0	0	0
ahpF_2	0	0	0	0	0	0	0	1	0	0	0	0	0
allE	0	0	0	0	0	0	0	0	0	1	0	0	0
amaA	0	0	0	0	0	0	0	9	0	0	0	0	0
amnD	0	0	0	0	0	0	0	0	0	1	0	0	0
aphA	0	0	0	0	0	0	0	7	0	0	0	0	0
aplIM	0	0	0	1	0	0	0	0	0	0	0	0	0
araB_3	0	0	0	0	0	0	0	0	0	1	0	0	0
arcA_1	0	0	0	0	0	0	0	1	0	0	0	0	0
argF_1	0	0	0	0	0	0	0	0	0	2	0	0	0
argR_3	0	0	0	0	0	0	0	1	0	0	0	0	0
argS_2	0	0	1	0	0	0	0	0	0	0	0	0	0
argT	0	0	0	0	0	0	0	1	0	0	0	0	0
asd_2	0	0	0	0	0	0	0	11	0	0	0	0	0
asnS_2	0	0	0	0	0	0	0	1	0	0	0	0	0
asp2_2	0	0	0	0	0	0	0	1	0	0	0	0	0
aspS_2	0	0	0	0	0	0	0	0	0	1	0	0	0
atpA_2	0	0	0	0	0	0	0	1	0	0	0	0	0
atpB_2	0	0	0	0	0	0	0	1	0	0	0	0	0
atpC_2	0	0	0	0	0	0	0	1	0	0	0	0	0
atpD_2	0	0	0	0	0	0	0	1	0	0	0	0	0
atpE_2	0	0	0	0	0	0	0	4	0	0	0	0	0
atpF_2	0	0	0	0	0	0	0	1	0	0	0	0	0
atpG_2	0	0	0	0	0	0	0	1	0	0	0	0	0
atpH_2	0	0	0	0	0	0	0	0	0	1	0	0	0
azo1_2	0	0	0	0	0	0	0	1	0	0	0	0	0
baeS	0	0	0	0	0	0	0	0	0	0	1	0	0
barP	0	0	0	0	0	0	0	1	0	0	0	0	0
bceA_3	0	0	0	0	0	0	0	2	0	0	0	0	0
bceB_4	0	0	0	0	0	0	0	1	0	0	0	0	0
bcgIA_1	0	0	0	0	0	0	0	2	0	0	0	0	0
bcgIA_2	0	0	0	0	0	0	0	3	0	0	0	0	0
bcgIB	0	0	0	0	0	0	0	6	0	0	0	0	0
bclA	0	0	1	0	0	0	0	0	0	0	0	0	0
bcr_3	0	0	0	0	0	0	0	3	0	0	0	0	0
bdbD_2	0	0	0	0	0	0	0	0	0	0	2	0	0
betA_2	0	0	0	0	0	0	0	1	0	0	0	0	0
betB	0	0	0	0	0	0	0	1	0	0	0	0	0
bglA_2	0	0	0	0	0	0	0	1	0	0	0	0	0
bglH	0	0	0	0	0	0	0	1	0	0	0	0	0
bin3_1	0	0	0	0	0	0	0	4	0	0	0	0	0
bin3_2	0	0	0	0	0	0	0	4	0	0	0	0	0
bla	0	0	0	0	0	0	0	0	0	1	0	0	0
blaI_1	0	0	0	0	0	0	0	1	0	0	0	0	0
blaI_2	0	0	0	0	0	0	0	1	0	0	0	0	0
blaR1_1	0	0	0	0	0	0	0	3	0	0	0	0	0
bmrA_2	0	0	0	0	0	0	0	1	0	0	0	0	0
brnQ_4	0	0	0	0	0	0	0	3	0	0	0	0	0
budC	0	0	0	0	0	0	0	0	1	0	0	0	0
cah	0	0	0	0	0	0	0	1	0	0	0	0	0
caiD	0	0	0	0	0	0	0	0	0	1	0	0	0
capD_1	0	0	0	0	0	0	0	1	0	0	0	0	0
capD_2	0	0	0	0	0	0	0	1	0	0	0	0	0
carB_2	0	0	0	0	0	0	0	0	0	1	0	0	0
cbbL	0	0	0	0	0	0	0	5	0	0	0	0	0
cca_2	0	0	0	0	0	0	0	0	0	1	0	0	0
ccmK1	0	0	0	1	0	0	0	0	0	0	0	0	0
ccsA	0	0	0	0	0	0	0	1	0	0	0	0	0
cdaA_2	0	0	0	0	0	0	0	0	0	1	0	0	0
cemA	0	0	0	0	0	0	0	1	0	0	0	0	0
cetZ	0	0	0	0	0	0	0	2	0	0	0	0	0
cfr	0	0	0	0	0	0	0	2	0	0	0	0	0
cfr_1	0	0	0	0	0	0	0	1	0	0	0	0	0
clpB_1	0	0	0	0	0	0	0	1	0	0	0	0	0
clpB_2	0	0	1	0	0	0	0	0	0	0	0	0	0
clpC_2	0	0	0	0	0	0	0	1	0	0	0	0	0
clpE	0	0	0	0	0	0	0	0	1	0	0	0	0
clpL_2	0	0	0	0	0	0	0	0	0	0	2	0	0
clpP_3	0	0	0	0	0	0	0	4	0	0	0	0	0
clpP_4	0	0	0	0	0	0	0	1	0	0	0	0	0
cls_3	0	0	0	0	0	0	0	1	0	0	0	0	0
cna_2	0	0	0	0	0	0	0	1	0	0	0	0	0
cntA_2	0	0	0	0	0	0	0	4	0	0	0	0	0
cntB_2	0	0	0	0	0	0	0	4	0	0	0	0	0
cntD_2	0	0	0	0	0	0	0	4	0	0	0	0	0
coaE_2	0	0	0	0	0	0	0	1	0	0	0	0	0
comFA_2	0	0	0	0	0	0	0	0	0	0	0	2	0
cpcB	0	0	0	1	0	0	0	0	0	0	0	0	0
cpdB	0	0	0	0	0	0	0	1	0	0	0	0	0
creC	0	0	0	0	0	0	0	7	0	0	0	0	0
csbC	0	0	0	0	0	0	0	1	0	0	0	0	0
csd_2	0	0	0	0	0	0	0	0	0	0	0	4	0
cspC	0	0	0	1	0	0	0	0	0	0	0	0	0
cspG	0	0	0	0	0	0	0	1	0	0	0	0	0
ctaB2_2	0	0	0	0	0	0	0	1	0	0	0	0	0
cysK1	0	0	0	0	0	0	0	1	0	0	0	0	0
cysL	0	0	0	0	0	0	0	6	0	0	0	0	0
cysM	0	0	0	0	0	0	0	1	0	0	0	0	0
cysN	0	0	0	0	0	0	0	1	0	0	0	0	0
czcD_3	0	0	0	0	0	0	1	0	0	0	0	0	0
dapE_2	0	0	0	0	0	0	0	1	0	0	0	0	0
dauA	0	0	0	0	0	0	0	2	0	0	0	0	0
dcuA	0	0	0	0	0	0	0	1	0	0	0	0	0
deoD_2	0	0	1	0	0	0	0	0	0	0	0	0	0
deoR	0	0	0	0	0	0	0	0	0	0	1	0	0
dhaL_2	0	0	0	0	0	0	0	0	0	1	0	0	0
dinB_1	0	0	0	0	0	0	0	0	1	0	0	0	0
dinB_2	0	0	0	0	0	0	0	0	0	0	2	0	0
dinG_2	0	0	0	0	0	0	0	1	0	0	0	0	0
dnaC_3	0	0	0	0	0	0	0	0	0	0	2	0	0
dnaG_2	0	0	0	0	0	0	0	7	0	0	0	0	0
dnaN_2	0	0	0	0	0	0	0	1	0	0	0	0	0
dppA	0	0	0	0	0	0	0	1	0	0	0	0	0
dppB	0	0	0	0	0	0	0	1	0	0	0	0	0
dppC	0	0	0	0	0	0	0	2	0	0	0	0	0
dut_1	0	0	0	0	0	0	0	4	0	0	0	0	0
dut_2	0	0	0	0	0	0	0	1	0	0	0	0	0
ebh_2	0	0	0	0	0	0	0	1	0	0	0	0	0
ebh_3	0	0	0	0	0	0	0	1	0	0	0	0	0
ecfA1_2	0	0	0	0	0	0	0	1	0	0	0	0	0
ecfT_3	0	0	0	0	0	0	0	1	0	0	0	0	0
efeN_1	0	0	0	0	0	0	0	1	0	0	0	0	0
elfA	0	0	0	1	0	0	0	0	0	0	0	0	0
emrY	0	0	0	0	0	0	0	0	0	1	0	0	0
endA	0	0	0	0	0	0	0	1	0	0	0	0	0
eno_2	0	0	0	0	0	0	0	1	0	0	0	0	0
entA_2	0	0	0	0	0	0	0	4	0	0	0	0	0
entB	0	0	0	0	0	0	0	20	0	0	0	0	0
entC2	0	0	0	0	0	0	0	3	0	0	0	0	0
entE	0	0	0	0	0	1	0	0	0	0	0	0	0
envZ	0	0	0	0	0	0	0	0	0	1	0	0	0
essC_2	0	0	0	0	0	0	0	1	0	0	0	0	0
essD	0	0	0	0	0	0	0	1	0	0	0	0	0
essE	0	0	0	0	0	0	0	3	0	0	0	0	0
essG_5	0	0	0	0	0	0	0	1	0	0	0	0	0
esxB	0	0	0	0	0	0	0	2	0	0	0	0	0
esxD	0	0	0	0	0	0	0	5	0	0	0	0	0
ettA_1	0	0	0	0	0	0	0	7	0	0	0	0	0
exbD	0	0	0	0	0	0	0	0	0	1	0	0	0
fabH_2	0	0	0	0	0	0	0	1	0	0	0	0	0
fabR	0	0	0	0	0	0	0	1	0	0	0	0	0
farA	0	0	0	0	0	0	0	1	0	0	0	0	0
fda_2	0	0	0	1	0	0	0	0	0	0	0	0	0
femA_5	0	0	0	0	0	0	0	0	0	0	0	5	0
fetA_2	0	0	0	0	0	0	0	1	0	0	0	0	0
fib_2	0	0	0	0	0	0	0	0	0	0	0	6	0
fis	0	0	0	0	0	0	0	1	0	0	0	0	0
flr_1	0	0	0	0	0	0	0	0	0	0	0	6	0
flr_2	0	0	0	0	0	0	0	1	0	0	0	0	0
fni_2	0	0	0	0	0	0	0	1	0	0	0	0	0
fnr	0	0	0	0	0	0	0	1	0	0	0	0	0
fosB	0	0	0	0	0	0	0	2	0	0	0	0	0
frmA	0	0	0	0	0	0	0	1	0	0	0	0	0
frmR	0	0	0	1	0	0	0	0	0	0	0	0	0
fsaB	0	0	0	0	0	0	0	1	0	0	0	0	0
ftsA_2	0	0	0	0	0	0	0	1	0	0	0	0	0
ftsB	0	0	0	0	0	0	0	0	0	1	0	0	0
ftsH_2	0	0	0	0	0	0	0	1	0	0	0	0	0
ftsH4	0	0	0	1	0	0	0	0	0	0	0	0	0
ftsK_2	0	0	0	0	0	0	0	3	0	0	0	0	0
fusA_2	0	0	0	0	0	0	0	1	0	0	0	0	0
galE	0	0	0	0	0	0	0	0	0	1	0	0	0
galT	0	0	0	0	0	0	0	1	0	0	0	0	0
gap2	0	0	0	0	0	0	0	1	0	0	0	0	0
gapA	0	0	0	0	0	0	0	3	0	0	0	0	0
gapA1_1	0	0	0	0	0	0	0	0	0	1	0	0	0
gatB_3	0	0	0	0	0	0	0	1	0	0	0	0	0
gcvPB_2	0	0	0	0	0	0	0	1	0	0	0	0	0
geoA	0	0	0	0	0	0	0	3	0	0	0	0	0
glcB_2	0	0	0	0	0	0	0	1	0	0	0	0	0
gldA	0	0	0	0	0	0	0	1	0	0	0	0	0
glnQ_2	0	0	0	0	0	0	0	0	0	1	0	0	0
gltR_2	0	0	0	0	0	0	0	1	0	0	0	0	0
gmk_2	0	0	0	0	0	0	0	1	0	0	0	0	0
gph_2	0	0	0	0	0	0	0	1	0	0	0	0	0
gpmA_3	0	0	0	0	0	0	0	0	0	1	0	0	0
graS_3	0	0	0	0	0	0	0	1	0	0	0	0	0
groL_2	0	0	0	0	0	0	0	1	0	0	0	0	0
groS_2	0	0	0	0	0	0	0	1	0	0	0	0	0
group_10000	0	0	0	1	0	0	0	0	0	0	0	0	0
group_10001	0	0	0	1	0	0	0	0	0	0	0	0	0
group_10002	0	0	0	1	0	0	0	0	0	0	0	0	0
group_10003	0	0	0	1	0	0	0	0	0	0	0	0	0
group_10004	0	0	0	1	0	0	0	0	0	0	0	0	0
group_10005	0	0	0	1	0	0	0	0	0	0	0	0	0
group_10006	0	0	0	1	0	0	0	0	0	0	0	0	0
group_10007	0	0	0	1	0	0	0	0	0	0	0	0	0
group_10008	0	0	0	1	0	0	0	0	0	0	0	0	0
group_10009	0	0	0	1	0	0	0	0	0	0	0	0	0
group_10010	0	0	0	1	0	0	0	0	0	0	0	0	0
group_10011	0	0	0	1	0	0	0	0	0	0	0	0	0
group_10012	0	0	0	1	0	0	0	0	0	0	0	0	0
group_10013	0	0	0	1	0	0	0	0	0	0	0	0	0
group_10014	0	0	0	1	0	0	0	0	0	0	0	0	0
group_10015	0	0	0	1	0	0	0	0	0	0	0	0	0
group_10016	0	0	0	1	0	0	0	0	0	0	0	0	0
group_10017	0	0	0	1	0	0	0	0	0	0	0	0	0
group_10018	0	0	0	1	0	0	0	0	0	0	0	0	0
group_10019	0	0	0	1	0	0	0	0	0	0	0	0	0
group_1002	0	0	0	1	0	0	0	0	0	0	0	0	0
group_10020	0	0	0	1	0	0	0	0	0	0	0	0	0
group_10021	0	0	0	1	0	0	0	0	0	0	0	0	0
group_10022	0	0	0	1	0	0	0	0	0	0	0	0	0
group_10023	0	0	0	1	0	0	0	0	0	0	0	0	0
group_10024	0	0	0	1	0	0	0	0	0	0	0	0	0
group_10025	0	0	0	1	0	0	0	0	0	0	0	0	0
group_10026	0	0	0	1	0	0	0	0	0	0	0	0	0
group_10027	0	0	0	1	0	0	0	0	0	0	0	0	0
group_10028	0	0	0	1	0	0	0	0	0	0	0	0	0
group_10029	0	0	0	1	0	0	0	0	0	0	0	0	0
group_10030	0	0	0	1	0	0	0	0	0	0	0	0	0
group_10031	0	0	0	1	0	0	0	0	0	0	0	0	0
group_10032	0	0	0	1	0	0	0	0	0	0	0	0	0
group_10034	0	0	0	1	0	0	0	0	0	0	0	0	0
group_10035	0	0	0	1	0	0	0	0	0	0	0	0	0
group_10036	0	0	0	1	0	0	0	0	0	0	0	0	0
group_10037	0	0	0	1	0	0	0	0	0	0	0	0	0
group_10038	0	0	0	1	0	0	0	0	0	0	0	0	0
group_10040	0	0	0	0	0	0	0	1	0	0	0	0	0
group_10041	0	0	0	0	0	0	0	1	0	0	0	0	0
group_10042	0	0	0	0	0	0	0	3	0	0	0	0	0
group_10043	0	0	0	0	0	0	0	1	0	0	0	0	0
group_10044	0	0	0	0	0	0	0	1	0	0	0	0	0
group_10046	0	0	0	0	0	0	0	3	0	0	0	0	0
group_10047	0	0	0	0	0	0	0	3	0	0	0	0	0
group_10048	0	0	0	0	0	0	0	3	0	0	0	0	0
group_10049	0	0	0	0	0	0	0	3	0	0	0	0	0
group_10050	0	0	0	0	0	0	0	1	0	0	0	0	0
group_10051	0	0	0	0	0	0	0	3	0	0	0	0	0
group_10052	0	0	0	0	0	0	0	3	0	0	0	0	0
group_10054	0	0	0	0	0	0	0	2	0	0	0	0	0
group_10055	0	0	0	0	0	0	0	6	0	0	0	0	0
group_10056	0	0	0	0	0	0	0	6	0	0	0	0	0
group_10057	0	0	0	0	0	0	0	1	0	0	0	0	0
group_10058	0	0	0	0	0	0	0	1	0	0	0	0	0
group_10059	0	0	0	0	0	0	0	1	0	0	0	0	0
group_10060	0	0	0	0	0	0	0	1	0	0	0	0	0
group_10061	0	0	0	0	0	0	0	1	0	0	0	0	0
group_10062	0	0	0	0	0	0	0	1	0	0	0	0	0
group_10063	0	0	0	0	0	0	0	1	0	0	0	0	0
group_10064	0	0	0	0	0	0	0	4	0	0	0	0	0
group_10065	0	0	0	0	0	0	0	4	0	0	0	0	0
group_10066	0	0	0	0	0	0	0	4	0	0	0	0	0
group_10067	0	0	0	0	0	0	0	1	0	0	0	0	0
group_10068	0	0	0	0	0	0	0	4	0	0	0	0	0
group_10069	0	0	0	0	0	0	0	4	0	0	0	0	0
group_10070	0	0	0	0	0	0	0	4	0	0	0	0	0
group_10071	0	0	0	0	0	0	0	4	0	0	0	0	0
group_10072	0	0	0	0	0	0	0	4	0	0	0	0	0
group_10073	0	0	0	0	0	0	0	4	0	0	0	0	0
group_10074	0	0	0	0	0	0	0	4	0	0	0	0	0
group_10075	0	0	0	0	0	0	0	4	0	0	0	0	0
group_10076	0	0	0	0	0	0	0	4	0	0	0	0	0
group_10077	0	0	0	0	0	0	0	4	0	0	0	0	0
group_10079	0	0	0	0	0	0	0	5	0	0	0	0	0
group_10080	0	0	0	0	0	0	0	1	0	0	0	0	0
group_10081	0	0	0	0	0	0	0	1	0	0	0	0	0
group_10083	0	0	0	0	0	0	0	5	0	0	0	0	0
group_10084	0	0	0	0	0	0	0	1	0	0	0	0	0
group_10085	0	0	0	0	0	0	0	1	0	0	0	0	0
group_10086	0	0	0	0	0	0	0	2	0	0	0	0	0
group_10087	0	0	0	0	0	0	0	1	0	0	0	0	0
group_10088	0	0	0	0	0	0	0	1	0	0	0	0	0
group_10089	0	0	0	0	0	0	0	1	0	0	0	0	0
group_1009	0	0	0	0	0	0	0	1	0	0	0	0	0
group_10090	0	0	0	0	0	0	0	1	0	0	0	0	0
group_10091	0	0	0	0	0	0	0	1	0	0	0	0	0
group_10092	0	0	0	0	0	0	0	2	0	0	0	0	0
group_10093	0	0	0	0	0	0	0	1	0	0	0	0	0
group_10094	0	0	0	0	0	0	0	1	0	0	0	0	0
group_10095	0	0	0	0	0	0	0	1	0	0	0	0	0
group_10096	0	0	0	0	0	0	0	2	0	0	0	0	0
group_10098	0	0	0	0	0	0	0	2	0	0	0	0	0
group_10099	0	0	0	0	0	0	0	2	0	0	0	0	0
group_10101	0	0	0	0	0	0	0	1	0	0	0	0	0
group_10102	0	0	0	0	0	0	0	1	0	0	0	0	0
group_10103	0	0	0	0	0	0	0	1	0	0	0	0	0
group_10104	0	0	0	0	0	0	0	1	0	0	0	0	0
group_10105	0	0	0	0	0	0	0	1	0	0	0	0	0
group_10106	0	0	0	0	0	0	0	1	0	0	0	0	0
group_10107	0	0	0	0	0	0	0	1	0	0	0	0	0
group_10108	0	0	0	0	0	0	0	1	0	0	0	0	0
group_10109	0	0	0	0	0	0	0	1	0	0	0	0	0
group_10110	0	0	0	0	0	0	0	1	0	0	0	0	0
group_10111	0	0	0	0	0	0	0	1	0	0	0	0	0
group_10112	0	0	0	0	0	0	0	1	0	0	0	0	0
group_10113	0	0	0	0	0	0	0	1	0	0	0	0	0
group_10114	0	0	0	0	0	0	0	1	0	0	0	0	0
group_10115	0	0	0	0	0	0	0	1	0	0	0	0	0
group_10116	0	0	0	0	0	0	0	1	0	0	0	0	0
group_10117	0	0	0	0	0	0	0	1	0	0	0	0	0
group_10118	0	0	0	0	0	0	0	1	0	0	0	0	0
group_10119	0	0	0	0	0	0	0	1	0	0	0	0	0
group_1012	0	0	0	0	0	0	0	0	0	1	0	0	0
group_10120	0	0	0	0	0	0	0	1	0	0	0	0	0
group_10122	0	0	0	0	0	0	0	1	0	0	0	0	0
group_10123	0	0	0	0	0	0	0	2	0	0	0	0	0
group_10125	0	0	0	0	0	0	0	3	0	0	0	0	0
group_10126	0	0	0	0	0	0	0	1	0	0	0	0	0
group_10127	0	0	0	0	0	0	0	1	0	0	0	0	0
group_10128	0	0	0	0	0	0	0	1	0	0	0	0	0
group_10129	0	0	0	0	0	0	0	1	0	0	0	0	0
group_10130	0	0	0	0	0	0	0	1	0	0	0	0	0
group_10131	0	0	0	0	0	0	0	1	0	0	0	0	0
group_10133	0	0	0	0	0	0	0	1	0	0	0	0	0
group_10134	0	0	0	0	0	0	0	1	0	0	0	0	0
group_10135	0	0	0	0	0	0	0	1	0	0	0	0	0
group_10136	0	0	0	0	0	0	0	1	0	0	0	0	0
group_10137	0	0	0	0	0	0	0	1	0	0	0	0	0
group_10138	0	0	0	0	0	0	0	1	0	0	0	0	0
group_10139	0	0	0	0	0	0	0	1	0	0	0	0	0
group_10140	0	0	0	0	0	0	0	1	0	0	0	0	0
group_10141	0	0	0	0	0	0	0	2	0	0	0	0	0
group_10142	0	0	0	0	0	0	0	2	0	0	0	0	0
group_10143	0	0	0	0	0	0	0	1	0	0	0	0	0
group_10144	0	0	0	0	0	0	0	2	0	0	0	0	0
group_10145	0	0	0	1	0	0	0	0	0	0	0	0	0
group_10146	0	0	0	1	0	0	0	0	0	0	0	0	0
group_10147	0	0	0	1	0	0	0	0	0	0	0	0	0
group_10148	0	0	0	1	0	0	0	0	0	0	0	0	0
group_10149	0	0	0	1	0	0	0	0	0	0	0	0	0
group_10150	0	0	0	1	0	0	0	0	0	0	0	0	0
group_10151	0	0	0	1	0	0	0	0	0	0	0	0	0
group_10152	0	0	0	1	0	0	0	0	0	0	0	0	0
group_10153	0	0	0	1	0	0	0	0	0	0	0	0	0
group_10154	0	0	0	1	0	0	0	0	0	0	0	0	0
group_10155	0	0	0	1	0	0	0	0	0	0	0	0	0
group_10156	0	0	0	1	0	0	0	0	0	0	0	0	0
group_10157	0	0	0	1	0	0	0	0	0	0	0	0	0
group_10158	0	0	0	1	0	0	0	0	0	0	0	0	0
group_10159	0	0	0	1	0	0	0	0	0	0	0	0	0
group_10160	0	0	0	1	0	0	0	0	0	0	0	0	0
group_10161	0	0	0	1	0	0	0	0	0	0	0	0	0
group_10162	0	0	0	1	0	0	0	0	0	0	0	0	0
group_10163	0	0	0	1	0	0	0	0	0	0	0	0	0
group_10164	0	0	0	1	0	0	0	0	0	0	0	0	0
group_10165	0	0	0	1	0	0	0	0	0	0	0	0	0
group_10166	0	0	0	1	0	0	0	0	0	0	0	0	0
group_10167	0	0	0	1	0	0	0	0	0	0	0	0	0
group_10168	0	0	0	1	0	0	0	0	0	0	0	0	0
group_10169	0	0	0	1	0	0	0	0	0	0	0	0	0
group_10170	0	0	0	1	0	0	0	0	0	0	0	0	0
group_10171	0	0	0	1	0	0	0	0	0	0	0	0	0
group_10172	0	0	0	1	0	0	0	0	0	0	0	0	0
group_10173	0	0	0	1	0	0	0	0	0	0	0	0	0
group_10174	0	0	0	1	0	0	0	0	0	0	0	0	0
group_10175	0	0	0	1	0	0	0	0	0	0	0	0	0
group_10176	0	0	0	1	0	0	0	0	0	0	0	0	0
group_10177	0	0	0	1	0	0	0	0	0	0	0	0	0
group_10178	0	0	0	1	0	0	0	0	0	0	0	0	0
group_10179	0	0	0	1	0	0	0	0	0	0	0	0	0
group_10180	0	0	0	1	0	0	0	0	0	0	0	0	0
group_10181	0	0	0	1	0	0	0	0	0	0	0	0	0
group_10182	0	0	0	1	0	0	0	0	0	0	0	0	0
group_10184	0	0	0	1	0	0	0	0	0	0	0	0	0
group_10186	0	0	0	1	0	0	0	0	0	0	0	0	0
group_10187	0	0	0	1	0	0	0	0	0	0	0	0	0
group_1019	0	0	0	0	0	0	0	2	0	0	0	0	0
group_10191	0	0	0	1	0	0	0	0	0	0	0	0	0
group_10192	0	0	0	1	0	0	0	0	0	0	0	0	0
group_10193	0	0	0	1	0	0	0	0	0	0	0	0	0
group_10194	0	0	0	1	0	0	0	0	0	0	0	0	0
group_10195	0	0	0	1	0	0	0	0	0	0	0	0	0
group_10196	0	0	0	1	0	0	0	0	0	0	0	0	0
group_10197	0	0	0	1	0	0	0	0	0	0	0	0	0
group_10198	0	0	0	1	0	0	0	0	0	0	0	0	0
group_10200	0	0	0	1	0	0	0	0	0	0	0	0	0
group_10201	0	0	0	1	0	0	0	0	0	0	0	0	0
group_10202	0	0	0	1	0	0	0	0	0	0	0	0	0
group_10203	0	0	0	1	0	0	0	0	0	0	0	0	0
group_10206	0	0	0	1	0	0	0	0	0	0	0	0	0
group_10207	0	0	0	1	0	0	0	0	0	0	0	0	0
group_10208	0	0	0	1	0	0	0	0	0	0	0	0	0
group_10209	0	0	0	1	0	0	0	0	0	0	0	0	0
group_10211	0	0	0	1	0	0	0	0	0	0	0	0	0
group_10212	0	0	0	1	0	0	0	0	0	0	0	0	0
group_10213	0	0	0	1	0	0	0	0	0	0	0	0	0
group_10215	0	0	0	1	0	0	0	0	0	0	0	0	0
group_10216	0	0	0	1	0	0	0	0	0	0	0	0	0
group_10217	0	0	0	1	0	0	0	0	0	0	0	0	0
group_10218	0	0	0	1	0	0	0	0	0	0	0	0	0
group_10219	0	0	0	1	0	0	0	0	0	0	0	0	0
group_1022	0	0	0	0	0	0	0	0	0	1	0	0	0
group_10220	0	0	0	1	0	0	0	0	0	0	0	0	0
group_10221	0	0	0	1	0	0	0	0	0	0	0	0	0
group_10222	0	0	0	1	0	0	0	0	0	0	0	0	0
group_10223	0	0	0	1	0	0	0	0	0	0	0	0	0
group_10224	0	0	0	1	0	0	0	0	0	0	0	0	0
group_10225	0	0	0	0	0	0	0	1	0	0	0	0	0
group_10226	0	0	0	0	0	0	0	2	0	0	0	0	0
group_10227	0	0	0	0	0	0	0	1	0	0	0	0	0
group_10228	0	0	0	0	0	0	0	1	0	0	0	0	0
group_10229	0	0	0	0	0	0	0	1	0	0	0	0	0
group_10230	0	0	0	0	0	0	0	1	0	0	0	0	0
group_10231	0	0	0	0	0	0	0	1	0	0	0	0	0
group_10232	0	0	0	5	0	0	0	0	0	0	0	0	0
group_10234	0	0	0	1	0	0	0	0	0	0	0	0	0
group_10235	0	0	0	0	0	0	0	1	0	0	0	0	0
group_10236	0	0	0	1	0	0	0	0	0	0	0	0	0
group_10237	0	0	0	1	0	0	0	0	0	0	0	0	0
group_10238	0	0	0	0	0	0	0	1	0	0	0	0	0
group_10239	0	0	0	0	0	0	0	1	0	0	0	0	0
group_1024	0	0	0	0	0	0	0	3	0	0	0	0	0
group_10240	0	0	0	0	0	0	0	1	0	0	0	0	0
group_10241	0	0	0	0	0	0	0	1	0	0	0	0	0
group_10242	0	0	0	0	0	0	0	2	0	0	0	0	0
group_10244	0	0	0	0	0	0	0	2	0	0	0	0	0
group_10245	0	0	0	0	0	0	0	2	0	0	0	0	0
group_10246	0	0	0	0	0	0	0	2	0	0	0	0	0
group_10247	0	0	0	0	0	0	0	2	0	0	0	0	0
group_10248	0	0	0	0	0	0	0	1	0	0	0	0	0
group_1025	0	0	0	1	0	0	0	0	0	0	0	0	0
group_10250	0	0	0	0	0	0	0	1	0	0	0	0	0
group_10251	0	0	0	0	0	0	0	1	0	0	0	0	0
group_10252	0	0	0	0	0	0	0	2	0	0	0	0	0
group_10253	0	0	0	0	0	0	0	1	0	0	0	0	0
group_10255	0	0	0	0	0	0	0	1	0	0	0	0	0
group_10256	0	0	0	0	0	0	0	2	0	0	0	0	0
group_10257	0	0	0	0	0	0	0	1	0	0	0	0	0
group_10258	0	0	0	0	0	0	0	1	0	0	0	0	0
group_10259	0	0	0	0	0	0	0	2	0	0	0	0	0
group_1026	0	0	0	0	0	0	0	0	0	1	0	0	0
group_10260	0	0	0	0	0	0	0	1	0	0	0	0	0
group_10261	0	0	0	0	0	0	0	1	0	0	0	0	0
group_10262	0	0	0	0	0	0	0	1	0	0	0	0	0
group_10263	0	0	0	0	0	0	0	1	0	0	0	0	0
group_10264	0	0	0	0	0	0	0	1	0	0	0	0	0
group_10265	0	0	0	0	0	0	0	1	0	0	0	0	0
group_10266	0	0	0	0	0	0	0	1	0	0	0	0	0
group_10267	0	0	0	0	0	0	0	1	0	0	0	0	0
group_10269	0	0	0	3	0	0	0	0	0	0	0	0	0
group_1027	0	0	0	0	0	0	0	0	0	1	0	0	0
group_10272	0	0	0	1	0	0	0	0	0	0	0	0	0
group_10273	0	0	0	0	0	0	0	1	0	0	0	0	0
group_10274	0	0	0	0	0	0	0	1	0	0	0	0	0
group_10275	0	0	0	1	0	0	0	0	0	0	0	0	0
group_10276	0	0	0	0	0	0	0	2	0	0	0	0	0
group_10277	0	0	0	0	0	0	0	2	0	0	0	0	0
group_10278	0	0	0	0	0	0	0	1	0	0	0	0	0
group_10279	0	0	0	0	0	0	0	2	0	0	0	0	0
group_10280	0	0	0	0	0	0	0	2	0	0	0	0	0
group_10281	0	0	0	0	0	0	0	2	0	0	0	0	0
group_10282	0	0	0	1	0	0	0	0	0	0	0	0	0
group_10283	0	0	0	1	0	0	0	0	0	0	0	0	0
group_10284	0	0	0	1	0	0	0	0	0	0	0	0	0
group_10286	0	0	0	0	0	0	0	1	0	0	0	0	0
group_10287	0	0	0	0	0	0	0	1	0	0	0	0	0
group_10288	0	0	0	0	0	0	0	1	0	0	0	0	0
group_1029	0	0	0	1	0	0	0	0	0	0	0	0	0
group_10290	0	0	0	0	0	0	0	1	0	0	0	0	0
group_10291	0	0	0	0	0	0	0	1	0	0	0	0	0
group_10292	0	0	0	0	0	0	0	1	0	0	0	0	0
group_10293	0	0	0	0	0	0	0	1	0	0	0	0	0
group_10294	0	0	0	1	0	0	0	0	0	0	0	0	0
group_10295	0	0	0	1	0	0	0	0	0	0	0	0	0
group_10296	0	0	0	1	0	0	0	0	0	0	0	0	0
group_10297	0	0	0	1	0	0	0	0	0	0	0	0	0
group_10298	0	0	0	1	0	0	0	0	0	0	0	0	0
group_10299	0	0	0	1	0	0	0	0	0	0	0	0	0
group_103	0	0	0	0	0	0	0	1	0	0	0	0	0
group_1030	0	0	0	0	0	0	0	0	0	1	0	0	0
group_10300	0	0	0	1	0	0	0	0	0	0	0	0	0
group_10301	0	0	0	1	0	0	0	0	0	0	0	0	0
group_10302	0	0	0	1	0	0	0	0	0	0	0	0	0
group_10303	0	0	0	1	0	0	0	0	0	0	0	0	0
group_10304	0	0	0	1	0	0	0	0	0	0	0	0	0
group_10305	0	0	0	1	0	0	0	0	0	0	0	0	0
group_10306	0	0	0	1	0	0	0	0	0	0	0	0	0
group_10307	0	0	0	1	0	0	0	0	0	0	0	0	0
group_10308	0	0	0	1	0	0	0	0	0	0	0	0	0
group_10309	0	0	0	1	0	0	0	0	0	0	0	0	0
group_10310	0	0	0	1	0	0	0	0	0	0	0	0	0
group_10311	0	0	0	1	0	0	0	0	0	0	0	0	0
group_10312	0	0	0	1	0	0	0	0	0	0	0	0	0
group_10313	0	0	0	1	0	0	0	0	0	0	0	0	0
group_10314	0	0	0	1	0	0	0	0	0	0	0	0	0
group_10315	0	0	0	1	0	0	0	0	0	0	0	0	0
group_10316	0	0	0	1	0	0	0	0	0	0	0	0	0
group_10317	0	0	0	1	0	0	0	0	0	0	0	0	0
group_10318	0	0	0	1	0	0	0	0	0	0	0	0	0
group_10319	0	0	0	1	0	0	0	0	0	0	0	0	0
group_10320	0	0	0	1	0	0	0	0	0	0	0	0	0
group_10321	0	0	0	1	0	0	0	0	0	0	0	0	0
group_10322	0	0	0	1	0	0	0	0	0	0	0	0	0
group_10323	0	0	0	1	0	0	0	0	0	0	0	0	0
group_10324	0	0	0	1	0	0	0	0	0	0	0	0	0
group_10325	0	0	0	1	0	0	0	0	0	0	0	0	0
group_10326	0	0	0	1	0	0	0	0	0	0	0	0	0
group_10327	0	0	0	1	0	0	0	0	0	0	0	0	0
group_10328	0	0	0	1	0	0	0	0	0	0	0	0	0
group_10329	0	0	0	1	0	0	0	0	0	0	0	0	0
group_1033	0	0	0	0	0	0	0	2	0	0	0	0	0
group_10330	0	0	0	1	0	0	0	0	0	0	0	0	0
group_10331	0	0	0	1	0	0	0	0	0	0	0	0	0
group_10332	0	0	0	1	0	0	0	0	0	0	0	0	0
group_10333	0	0	0	1	0	0	0	0	0	0	0	0	0
group_10334	0	0	0	1	0	0	0	0	0	0	0	0	0
group_10335	0	0	0	1	0	0	0	0	0	0	0	0	0
group_10336	0	0	0	1	0	0	0	0	0	0	0	0	0
group_10337	0	0	0	1	0	0	0	0	0	0	0	0	0
group_10338	0	0	0	1	0	0	0	0	0	0	0	0	0
group_10339	0	0	0	1	0	0	0	0	0	0	0	0	0
group_10340	0	0	0	1	0	0	0	0	0	0	0	0	0
group_10341	0	0	0	1	0	0	0	0	0	0	0	0	0
group_10342	0	0	0	1	0	0	0	0	0	0	0	0	0
group_10343	0	0	0	1	0	0	0	0	0	0	0	0	0
group_10344	0	0	0	1	0	0	0	0	0	0	0	0	0
group_10345	0	0	0	1	0	0	0	0	0	0	0	0	0
group_10346	0	0	0	1	0	0	0	0	0	0	0	0	0
group_10349	0	0	0	1	0	0	0	0	0	0	0	0	0
group_10351	0	0	0	0	0	0	0	1	0	0	0	0	0
group_10352	0	0	0	0	0	0	0	1	0	0	0	0	0
group_10353	0	0	0	0	0	0	0	1	0	0	0	0	0
group_10354	0	0	0	0	0	0	0	1	0	0	0	0	0
group_10356	0	0	0	2	0	0	0	0	0	0	0	0	0
group_10357	0	0	0	2	0	0	0	0	0	0	0	0	0
group_10358	0	0	0	2	0	0	0	0	0	0	0	0	0
group_10359	0	0	0	1	0	0	0	0	0	0	0	0	0
group_10360	0	0	0	1	0	0	0	0	0	0	0	0	0
group_10361	0	0	0	1	0	0	0	0	0	0	0	0	0
group_10362	0	0	0	1	0	0	0	0	0	0	0	0	0
group_10363	0	0	0	0	0	0	0	1	0	0	0	0	0
group_10364	0	0	0	0	0	0	0	1	0	0	0	0	0
group_10365	0	0	0	0	0	0	0	1	0	0	0	0	0
group_10366	0	0	0	0	0	0	0	1	0	0	0	0	0
group_10368	0	0	0	0	0	0	0	1	0	0	0	0	0
group_10369	0	0	0	0	0	0	0	1	0	0	0	0	0
group_10370	0	0	0	0	0	0	0	1	0	0	0	0	0
group_10371	0	0	0	0	0	0	0	1	0	0	0	0	0
group_10372	0	0	0	0	0	0	0	1	0	0	0	0	0
group_10373	0	0	0	0	0	0	0	1	0	0	0	0	0
group_10374	0	0	0	0	0	0	0	1	0	0	0	0	0
group_10375	0	0	0	0	0	0	0	1	0	0	0	0	0
group_10376	0	0	0	0	0	0	0	1	0	0	0	0	0
group_10377	0	0	0	0	0	0	0	1	0	0	0	0	0
group_10378	0	0	0	0	0	0	0	1	0	0	0	0	0
group_1038	0	0	0	0	0	0	0	18	0	0	0	0	0
group_10380	0	0	0	0	0	0	0	1	0	0	0	0	0
group_10383	0	0	0	0	0	0	0	1	0	0	0	0	0
group_10385	0	0	0	0	0	0	0	1	0	0	0	0	0
group_10386	0	0	0	0	0	0	0	1	0	0	0	0	0
group_10387	0	0	0	0	0	0	0	1	0	0	0	0	0
group_10388	0	0	0	0	0	0	0	1	0	0	0	0	0
group_10389	0	0	0	0	0	0	0	1	0	0	0	0	0
group_1039	0	0	0	0	0	0	0	9	0	0	0	0	0
group_10390	0	0	0	0	0	0	0	1	0	0	0	0	0
group_10391	0	0	0	0	0	0	0	1	0	0	0	0	0
group_10392	0	0	0	0	0	0	0	1	0	0	0	0	0
group_10393	0	0	0	0	0	0	0	1	0	0	0	0	0
group_10395	0	0	0	0	0	0	0	1	0	0	0	0	0
group_10396	0	0	0	0	0	0	0	1	0	0	0	0	0
group_10397	0	0	0	0	0	0	0	1	0	0	0	0	0
group_10398	0	0	0	0	0	0	0	1	0	0	0	0	0
group_10399	0	0	0	0	0	0	0	1	0	0	0	0	0
group_104	0	0	0	0	0	0	0	1	0	0	0	0	0
group_10401	0	0	0	0	0	0	0	1	0	0	0	0	0
group_10402	0	0	0	0	0	0	0	1	0	0	0	0	0
group_10403	0	0	0	0	0	0	0	1	0	0	0	0	0
group_10404	0	0	0	0	0	0	0	1	0	0	0	0	0
group_10405	0	0	0	0	0	0	0	1	0	0	0	0	0
group_10406	0	0	0	0	0	0	0	1	0	0	0	0	0
group_10407	0	0	0	0	0	0	0	1	0	0	0	0	0
group_10408	0	0	0	0	0	0	0	1	0	0	0	0	0
group_10409	0	0	0	0	0	0	0	1	0	0	0	0	0
group_1041	0	0	0	0	0	0	0	1	0	0	0	0	0
group_10410	0	0	0	0	0	0	0	1	0	0	0	0	0
group_10411	0	0	0	0	0	0	0	1	0	0	0	0	0
group_10413	0	0	0	0	0	0	0	1	0	0	0	0	0
group_10414	0	0	0	0	0	0	0	1	0	0	0	0	0
group_10415	0	0	0	0	0	0	0	1	0	0	0	0	0
group_10416	0	0	0	0	0	0	0	1	0	0	0	0	0
group_10417	0	0	0	0	0	0	0	1	0	0	0	0	0
group_10418	0	0	0	0	0	0	0	1	0	0	0	0	0
group_10419	0	0	0	0	0	0	0	1	0	0	0	0	0
group_10420	0	0	0	0	0	0	0	1	0	0	0	0	0
group_10421	0	0	0	0	0	0	0	1	0	0	0	0	0
group_10423	0	0	0	0	0	0	0	1	0	0	0	0	0
group_10424	0	0	0	0	0	0	0	1	0	0	0	0	0
group_10425	0	0	0	0	0	0	0	1	0	0	0	0	0
group_10426	0	0	0	0	0	0	0	1	0	0	0	0	0
group_10427	0	0	0	0	0	0	0	1	0	0	0	0	0
group_10428	0	0	0	0	0	0	0	1	0	0	0	0	0
group_10429	0	0	0	0	0	0	0	1	0	0	0	0	0
group_10430	0	0	0	0	0	0	0	1	0	0	0	0	0
group_10431	0	0	0	0	0	0	0	1	0	0	0	0	0
group_10432	0	0	0	0	0	0	0	1	0	0	0	0	0
group_10433	0	0	0	0	0	0	0	1	0	0	0	0	0
group_10434	0	0	0	0	0	0	0	1	0	0	0	0	0
group_10435	0	0	0	0	0	0	0	1	0	0	0	0	0
group_10436	0	0	0	0	0	0	0	1	0	0	0	0	0
group_10437	0	0	0	0	0	0	0	1	0	0	0	0	0
group_10438	0	0	0	0	0	0	0	1	0	0	0	0	0
group_10439	0	0	0	0	0	0	0	1	0	0	0	0	0
group_10440	0	0	0	0	0	0	0	1	0	0	0	0	0
group_10441	0	0	0	0	0	0	0	2	0	0	0	0	0
group_10442	0	0	0	0	0	0	0	1	0	0	0	0	0
group_10443	0	0	0	0	0	0	0	1	0	0	0	0	0
group_10445	0	0	0	0	0	0	0	1	0	0	0	0	0
group_10446	0	0	0	0	0	0	0	1	0	0	0	0	0
group_10447	0	0	0	0	0	0	0	1	0	0	0	0	0
group_10448	0	0	0	0	0	0	0	1	0	0	0	0	0
group_10449	0	0	0	0	0	0	0	1	0	0	0	0	0
group_1045	0	0	0	0	0	0	0	1	0	0	0	0	0
group_10450	0	0	0	0	0	0	0	1	0	0	0	0	0
group_10453	0	0	0	0	0	0	0	1	0	0	0	0	0
group_10454	0	0	0	0	0	0	0	1	0	0	0	0	0
group_10456	0	0	0	1	0	0	0	0	0	0	0	0	0
group_10457	0	0	0	1	0	0	0	0	0	0	0	0	0
group_10458	0	0	0	1	0	0	0	0	0	0	0	0	0
group_10459	0	0	0	1	0	0	0	0	0	0	0	0	0
group_10460	0	0	0	1	0	0	0	0	0	0	0	0	0
group_10461	0	0	0	1	0	0	0	0	0	0	0	0	0
group_10462	0	0	0	1	0	0	0	0	0	0	0	0	0
group_10463	0	0	0	1	0	0	0	0	0	0	0	0	0
group_10464	0	0	0	1	0	0	0	0	0	0	0	0	0
group_10465	0	0	0	1	0	0	0	0	0	0	0	0	0
group_10466	0	0	0	1	0	0	0	0	0	0	0	0	0
group_10467	0	0	0	1	0	0	0	0	0	0	0	0	0
group_10468	0	0	0	1	0	0	0	0	0	0	0	0	0
group_10469	0	0	0	1	0	0	0	0	0	0	0	0	0
group_10470	0	0	0	1	0	0	0	0	0	0	0	0	0
group_10471	0	0	0	1	0	0	0	0	0	0	0	0	0
group_10472	0	0	0	1	0	0	0	0	0	0	0	0	0
group_10473	0	0	0	1	0	0	0	0	0	0	0	0	0
group_10474	0	0	0	1	0	0	0	0	0	0	0	0	0
group_10476	0	0	0	1	0	0	0	0	0	0	0	0	0
group_10477	0	0	0	1	0	0	0	0	0	0	0	0	0
group_10478	0	0	0	1	0	0	0	0	0	0	0	0	0
group_10479	0	0	0	1	0	0	0	0	0	0	0	0	0
group_10480	0	0	0	1	0	0	0	0	0	0	0	0	0
group_10481	0	0	0	1	0	0	0	0	0	0	0	0	0
group_10482	0	0	0	1	0	0	0	0	0	0	0	0	0
group_10483	0	0	0	1	0	0	0	0	0	0	0	0	0
group_10484	0	0	0	1	0	0	0	0	0	0	0	0	0
group_10485	0	0	0	1	0	0	0	0	0	0	0	0	0
group_10486	0	0	0	1	0	0	0	0	0	0	0	0	0
group_10487	0	0	0	1	0	0	0	0	0	0	0	0	0
group_10488	0	0	0	1	0	0	0	0	0	0	0	0	0
group_10489	0	0	0	1	0	0	0	0	0	0	0	0	0
group_10490	0	0	0	1	0	0	0	0	0	0	0	0	0
group_10491	0	0	0	1	0	0	0	0	0	0	0	0	0
group_10492	0	0	0	1	0	0	0	0	0	0	0	0	0
group_10493	0	0	0	1	0	0	0	0	0	0	0	0	0
group_10494	0	0	0	1	0	0	0	0	0	0	0	0	0
group_10495	0	0	0	1	0	0	0	0	0	0	0	0	0
group_10496	0	0	0	1	0	0	0	0	0	0	0	0	0
group_10497	0	0	0	1	0	0	0	0	0	0	0	0	0
group_10498	0	0	0	1	0	0	0	0	0	0	0	0	0
group_10499	0	0	0	1	0	0	0	0	0	0	0	0	0
group_10500	0	0	0	0	0	0	0	1	0	0	0	0	0
group_10501	0	0	0	1	0	0	0	0	0	0	0	0	0
group_10502	0	0	0	1	0	0	0	0	0	0	0	0	0
group_10503	0	0	0	0	0	0	0	1	0	0	0	0	0
group_10504	0	0	0	0	0	0	0	1	0	0	0	0	0
group_10505	0	0	0	0	0	0	0	1	0	0	0	0	0
group_10506	0	0	0	0	0	0	0	1	0	0	0	0	0
group_10507	0	0	0	0	0	0	0	1	0	0	0	0	0
group_10508	0	0	0	0	0	0	0	1	0	0	0	0	0
group_10509	0	0	0	0	0	0	0	1	0	0	0	0	0
group_10510	0	0	0	0	0	0	0	1	0	0	0	0	0
group_10511	0	0	0	0	0	0	0	1	0	0	0	0	0
group_10512	0	0	0	0	0	0	0	2	0	0	0	0	0
group_10513	0	0	0	0	0	0	0	2	0	0	0	0	0
group_10514	0	0	0	0	0	0	0	2	0	0	0	0	0
group_10515	0	0	0	0	0	0	0	2	0	0	0	0	0
group_10516	0	0	0	0	0	0	0	2	0	0	0	0	0
group_10517	0	0	0	0	0	0	0	2	0	0	0	0	0
group_10518	0	0	0	0	0	0	0	2	0	0	0	0	0
group_10519	0	0	0	0	0	0	0	2	0	0	0	0	0
group_10520	0	0	0	1	0	0	0	0	0	0	0	0	0
group_10521	0	0	0	9	0	0	0	0	0	0	0	0	0
group_10524	0	0	0	0	0	0	0	0	0	0	1	0	0
group_10526	0	0	0	0	0	0	0	0	0	0	1	0	0
group_10528	0	0	0	0	0	0	0	1	0	0	0	0	0
group_10531	0	0	0	0	0	0	0	1	0	0	0	0	0
group_10532	0	0	0	0	0	0	0	1	0	0	0	0	0
group_10533	0	0	0	0	0	0	0	1	0	0	0	0	0
group_10534	0	0	0	0	0	0	0	1	0	0	0	0	0
group_10535	0	0	0	0	0	0	0	1	0	0	0	0	0
group_10536	0	0	0	0	0	0	0	1	0	0	0	0	0
group_10537	0	0	0	0	0	0	0	1	0	0	0	0	0
group_10538	0	0	0	0	0	0	0	1	0	0	0	0	0
group_10539	0	0	0	0	0	0	0	1	0	0	0	0	0
group_10540	0	0	0	0	0	0	0	1	0	0	0	0	0
group_10541	0	0	0	0	0	0	0	2	0	0	0	0	0
group_10542	0	0	0	0	0	0	0	1	0	0	0	0	0
group_10543	0	0	0	0	0	0	0	3	0	0	0	0	0
group_10544	0	0	0	0	0	0	0	3	0	0	0	0	0
group_10545	0	0	0	0	0	0	0	3	0	0	0	0	0
group_10546	0	0	0	0	0	0	0	1	0	0	0	0	0
group_10547	0	0	0	0	0	0	0	2	0	0	0	0	0
group_10548	0	0	0	0	0	0	0	1	0	0	0	0	0
group_10549	0	0	0	0	0	0	0	1	0	0	0	0	0
group_10550	0	0	0	0	0	0	0	1	0	0	0	0	0
group_10551	0	0	0	0	0	0	0	1	0	0	0	0	0
group_10552	0	0	0	0	0	0	0	1	0	0	0	0	0
group_10553	0	0	0	0	0	0	0	1	0	0	0	0	0
group_10554	0	0	0	0	0	0	0	1	0	0	0	0	0
group_10555	0	0	0	0	0	0	0	1	0	0	0	0	0
group_10556	0	0	0	0	0	0	0	1	0	0	0	0	0
group_10557	0	0	0	0	0	0	0	1	0	0	0	0	0
group_10558	0	0	0	0	0	0	0	1	0	0	0	0	0
group_10559	0	0	0	0	0	0	0	1	0	0	0	0	0
group_10560	0	0	0	0	0	0	0	1	0	0	0	0	0
group_10561	0	0	0	0	0	0	0	1	0	0	0	0	0
group_10562	0	0	0	0	0	0	0	1	0	0	0	0	0
group_10563	0	0	0	0	0	0	0	1	0	0	0	0	0
group_10565	0	0	0	0	0	0	0	2	0	0	0	0	0
group_10567	0	0	0	0	0	0	0	1	0	0	0	0	0
group_10568	0	0	0	0	0	0	0	1	0	0	0	0	0
group_10569	0	0	0	0	0	0	0	0	0	1	0	0	0
group_1057	0	0	0	0	0	0	1	0	0	0	0	0	0
group_10570	0	0	0	0	0	0	0	1	0	0	0	0	0
group_10572	0	0	0	0	0	0	0	0	0	1	0	0	0
group_10573	0	0	0	0	0	0	0	0	0	1	0	0	0
group_10574	0	0	0	0	0	0	0	0	0	1	0	0	0
group_10575	0	0	0	0	0	0	0	1	0	0	0	0	0
group_10576	0	0	0	0	0	0	0	1	0	0	0	0	0
group_10577	0	0	0	0	0	0	0	1	0	0	0	0	0
group_10578	0	0	0	1	0	0	0	0	0	0	0	0	0
group_10579	0	0	0	1	0	0	0	0	0	0	0	0	0
group_10580	0	0	0	1	0	0	0	0	0	0	0	0	0
group_10581	0	0	0	1	0	0	0	0	0	0	0	0	0
group_10582	0	0	0	1	0	0	0	0	0	0	0	0	0
group_10583	0	0	0	1	0	0	0	0	0	0	0	0	0
group_10584	0	0	0	1	0	0	0	0	0	0	0	0	0
group_10585	0	0	0	1	0	0	0	0	0	0	0	0	0
group_10586	0	0	0	1	0	0	0	0	0	0	0	0	0
group_10587	0	0	0	1	0	0	0	0	0	0	0	0	0
group_10588	0	0	0	1	0	0	0	0	0	0	0	0	0
group_10589	0	0	0	1	0	0	0	0	0	0	0	0	0
group_1059	0	0	0	0	0	0	0	1	0	0	0	0	0
group_10590	0	0	0	0	0	0	0	0	0	0	1	0	0
group_10591	0	0	0	0	0	0	0	0	0	0	1	0	0
group_10592	0	0	0	0	0	0	0	0	0	0	1	0	0
group_10593	0	0	0	0	0	0	0	0	0	0	1	0	0
group_10594	0	0	0	0	0	0	0	0	0	0	1	0	0
group_10595	0	0	0	0	0	0	0	0	0	0	1	0	0
group_10596	0	0	0	0	0	0	0	0	0	0	1	0	0
group_10597	0	0	0	0	0	0	0	0	0	0	1	0	0
group_10598	0	0	0	0	0	0	0	0	0	0	1	0	0
group_10599	0	0	0	0	0	0	0	0	0	0	1	0	0
group_10600	0	0	0	0	0	0	0	0	0	0	1	0	0
group_10601	0	0	0	0	0	0	0	0	0	0	1	0	0
group_10602	0	0	0	0	0	0	0	0	0	0	1	0	0
group_10603	0	0	0	0	0	0	0	0	0	0	1	0	0
group_10604	0	0	0	0	0	0	0	0	0	0	1	0	0
group_10605	0	0	0	0	0	0	0	0	0	0	1	0	0
group_10606	0	0	0	0	0	0	0	0	0	0	1	0	0
group_10607	0	0	0	0	0	0	0	0	0	0	1	0	0
group_10608	0	0	0	0	0	0	0	0	0	0	1	0	0
group_10609	0	0	0	0	0	0	0	0	0	0	1	0	0
group_10610	0	0	0	0	0	0	0	0	0	0	1	0	0
group_10611	0	0	0	0	0	0	0	0	0	0	1	0	0
group_10612	0	0	0	0	0	0	0	0	0	0	1	0	0
group_10613	0	0	0	0	0	0	0	0	0	0	1	0	0
group_10614	0	0	0	0	0	0	0	0	0	0	1	0	0
group_10615	0	0	0	0	0	0	0	0	0	0	1	0	0
group_10616	0	0	0	0	0	0	0	0	0	0	1	0	0
group_10617	0	0	0	0	0	0	0	0	0	0	1	0	0
group_10618	0	0	0	0	0	0	0	0	0	0	1	0	0
group_10619	0	0	0	0	0	0	0	0	0	0	1	0	0
group_10620	0	0	0	0	0	0	0	0	0	0	1	0	0
group_10621	0	0	0	0	0	0	0	0	0	0	1	0	0
group_10622	0	0	0	0	0	0	0	0	0	0	1	0	0
group_10623	0	0	0	0	0	0	0	0	0	2	0	0	0
group_10624	0	0	0	0	0	0	0	0	0	1	0	0	0
group_10626	0	0	0	0	0	0	0	0	0	1	0	0	0
group_10627	0	0	0	0	0	0	0	0	0	1	0	0	0
group_10628	0	0	0	0	0	0	0	0	0	1	0	0	0
group_10629	0	0	0	0	0	0	0	0	0	1	0	0	0
group_10630	0	0	0	0	0	0	0	0	0	1	0	0	0
group_10631	0	0	0	0	0	0	0	0	0	1	0	0	0
group_10632	0	0	0	0	0	0	0	0	0	1	0	0	0
group_10633	0	0	0	0	0	0	0	0	0	1	0	0	0
group_10634	0	0	0	0	0	0	0	0	0	1	0	0	0
group_10635	0	0	0	0	0	0	0	0	0	1	0	0	0
group_10636	0	0	0	0	0	0	0	0	0	1	0	0	0
group_10637	0	0	0	0	0	0	0	0	0	1	0	0	0
group_10638	0	0	0	0	0	0	0	0	0	1	0	0	0
group_10639	0	0	0	0	0	0	0	0	0	1	0	0	0
group_10640	0	0	0	0	0	0	0	0	0	1	0	0	0
group_10641	0	0	0	0	0	0	0	0	0	1	0	0	0
group_10642	0	0	0	0	0	0	0	0	0	1	0	0	0
group_10643	0	0	0	0	0	0	0	0	0	1	0	0	0
group_10644	0	0	0	0	0	0	0	0	0	1	0	0	0
group_10645	0	0	0	0	0	0	0	0	0	1	0	0	0
group_10646	0	0	0	0	0	0	0	0	0	1	0	0	0
group_10647	0	0	0	0	0	0	0	0	0	1	0	0	0
group_10648	0	0	0	0	0	0	0	0	0	1	0	0	0
group_10649	0	0	0	0	0	0	0	0	0	1	0	0	0
group_10650	0	0	0	0	0	0	0	0	0	1	0	0	0
group_10651	0	0	0	0	0	0	0	0	0	1	0	0	0
group_10652	0	0	0	0	0	0	0	1	0	0	0	0	0
group_10654	0	0	0	0	0	0	0	1	0	0	0	0	0
group_10655	0	0	0	0	0	0	0	0	0	1	0	0	0
group_10656	0	0	0	0	0	0	0	1	0	0	0	0	0
group_10657	0	0	0	0	0	0	1	0	0	0	0	0	0
group_10658	0	0	0	0	0	0	1	0	0	0	0	0	0
group_10660	0	0	0	0	0	0	1	0	0	0	0	0	0
group_10661	0	0	0	0	0	0	1	0	0	0	0	0	0
group_10662	0	0	0	0	0	0	1	0	0	0	0	0	0
group_10663	0	0	0	0	0	0	1	0	0	0	0	0	0
group_10664	0	0	0	0	0	0	1	0	0	0	0	0	0
group_10665	0	0	0	0	0	0	1	0	0	0	0	0	0
group_10666	0	0	0	0	0	0	1	0	0	0	0	0	0
group_10667	0	0	0	0	0	0	0	0	0	1	0	0	0
group_10669	0	0	0	0	0	0	0	1	0	0	0	0	0
group_10670	0	0	0	0	0	0	0	1	0	0	0	0	0
group_10671	0	0	0	0	0	0	0	1	0	0	0	0	0
group_10672	0	0	0	0	0	0	0	1	0	0	0	0	0
group_10673	0	0	0	0	0	0	0	1	0	0	0	0	0
group_10674	0	0	0	0	0	0	0	1	0	0	0	0	0
group_10675	0	0	0	0	0	0	0	1	0	0	0	0	0
group_10676	0	0	0	0	0	0	0	1	0	0	0	0	0
group_10677	0	0	0	0	0	0	0	1	0	0	0	0	0
group_10678	0	0	0	0	0	0	0	1	0	0	0	0	0
group_10682	0	0	0	0	0	0	0	0	0	0	0	1	0
group_10684	0	0	0	0	0	0	0	1	0	0	0	0	0
group_10685	0	0	0	0	0	0	0	1	0	0	0	0	0
group_10686	0	0	0	0	0	0	0	1	0	0	0	0	0
group_10687	0	0	0	0	0	0	0	1	0	0	0	0	0
group_1069	0	0	0	0	0	0	0	0	0	0	2	0	0
group_107	0	0	0	0	0	0	0	4	0	0	0	0	0
group_1072	0	0	0	0	0	0	0	1	0	0	0	0	0
group_1073	0	0	0	0	0	0	0	2	0	0	0	0	0
group_10733	0	0	0	0	0	0	0	0	0	1	0	0	0
group_1078	0	0	0	0	0	0	1	0	0	0	0	0	0
group_1081	0	0	0	0	0	0	0	0	0	1	0	0	0
group_1082	0	0	0	0	0	0	0	2	0	0	0	0	0
group_10849	0	0	0	0	0	0	0	0	0	1	0	0	0
group_1085	0	0	0	0	0	0	0	4	0	0	0	0	0
group_1088	0	0	0	0	0	0	0	2	0	0	0	0	0
group_1098	0	0	0	1	0	0	0	0	0	0	0	0	0
group_1099	0	0	0	0	0	0	0	1	0	0	0	0	0
group_110	0	0	0	0	0	0	0	2	0	0	0	0	0
group_1101	0	0	0	0	0	0	0	1	0	0	0	0	0
group_11045	0	0	0	0	0	0	0	0	0	3	0	0	0
group_1105	0	0	0	0	0	0	0	0	0	0	1	0	0
group_1109	0	0	0	0	0	0	0	0	0	1	0	0	0
group_111	0	0	0	0	0	0	0	1	0	0	0	0	0
group_1110	0	0	0	0	0	0	0	0	0	1	0	0	0
group_1111	0	0	0	0	0	0	0	0	0	1	0	0	0
group_1113	0	0	0	0	0	0	0	0	0	1	0	0	0
group_1119	0	0	0	0	0	0	0	0	0	0	0	1	0
group_112	0	0	0	0	0	0	0	2	0	0	0	0	0
group_1122	0	0	0	0	0	0	0	1	0	0	0	0	0
group_1126	0	0	0	0	0	0	0	0	0	1	0	0	0
group_1127	0	0	0	0	0	0	0	2	0	0	0	0	0
group_1128	0	0	0	0	0	0	0	2	0	0	0	0	0
group_1133	0	0	0	0	0	0	0	1	0	0	0	0	0
group_1134	0	0	0	1	0	0	0	0	0	0	0	0	0
group_1135	0	0	0	0	0	0	0	1	0	0	0	0	0
group_1138	0	0	0	0	0	0	0	3	0	0	0	0	0
group_1139	0	0	0	0	0	0	0	2	0	0	0	0	0
group_1141	0	0	0	0	0	0	0	3	0	0	0	0	0
group_1143	0	0	0	0	0	0	0	2	0	0	0	0	0
group_1144	0	0	0	0	0	0	0	1	0	0	0	0	0
group_1145	0	0	0	0	0	0	0	0	0	1	0	0	0
group_1146	0	0	0	0	0	0	0	1	0	0	0	0	0
group_1148	0	0	0	0	0	0	0	1	0	0	0	0	0
group_1149	0	0	0	0	0	0	0	1	0	0	0	0	0
group_1152	0	0	0	0	0	0	0	4	0	0	0	0	0
group_1154	0	0	0	0	0	0	0	4	0	0	0	0	0
group_1156	0	0	0	0	0	0	0	1	0	0	0	0	0
group_1158	0	0	0	0	0	0	0	1	0	0	0	0	0
group_1160	0	0	0	0	0	0	0	1	0	0	0	0	0
group_1161	0	0	0	0	0	0	0	0	0	0	0	6	0
group_1162	0	0	0	0	0	0	0	4	0	0	0	0	0
group_1165	0	0	0	0	0	0	0	1	0	0	0	0	0
group_1169	0	0	0	0	0	0	0	1	0	0	0	0	0
group_1171	0	0	0	0	0	0	0	2	0	0	0	0	0
group_1172	0	0	0	0	0	0	0	0	0	0	1	0	0
group_1176	0	0	0	0	0	0	0	2	0	0	0	0	0
group_118	0	0	0	0	0	0	0	2	0	0	0	0	0
group_1180	0	0	0	0	0	0	0	2	0	0	0	0	0
group_119	0	0	0	0	0	0	0	3	0	0	0	0	0
group_1191	0	0	0	0	0	0	0	0	0	3	0	0	0
group_1195	0	0	0	0	0	0	0	0	0	1	0	0	0
group_1197	0	0	0	0	0	0	0	1	0	0	0	0	0
group_1199	0	0	0	0	0	0	0	1	0	0	0	0	0
group_12	0	0	0	0	0	0	0	8	0	0	0	0	0
group_120	0	0	0	0	0	0	0	1	0	0	0	0	0
group_1200	0	0	0	0	0	0	0	1	0	0	0	0	0
group_1205	0	0	0	0	0	0	0	1	0	0	0	0	0
group_1206	0	0	0	0	0	0	0	1	0	0	0	0	0
group_1213	0	0	0	0	1	0	0	0	0	0	0	0	0
group_1214	0	0	0	0	0	0	0	20	0	0	0	0	0
group_1215	0	0	0	0	0	0	0	18	0	0	0	0	0
group_1218	0	0	0	0	0	0	0	4	0	0	0	0	0
group_1219	0	0	0	0	0	0	0	0	0	1	0	0	0
group_1220	0	0	0	0	0	0	0	1	0	0	0	0	0
group_1221	0	0	0	0	0	0	0	1	0	0	0	0	0
group_1225	0	0	0	1	0	0	0	0	0	0	0	0	0
group_1226	0	0	0	0	0	0	0	3	0	0	0	0	0
group_1230	0	0	0	0	0	0	0	1	0	0	0	0	0
group_1235	0	0	0	0	0	0	0	2	0	0	0	0	0
group_1239	0	0	0	0	0	0	0	1	0	0	0	0	0
group_1240	0	0	0	0	0	0	0	1	0	0	0	0	0
group_1247	0	0	0	0	0	0	0	2	0	0	0	0	0
group_125	0	0	0	0	0	0	0	0	0	1	0	0	0
group_1254	0	0	0	0	0	0	0	0	0	0	0	2	0
group_1255	0	0	0	0	0	0	0	0	0	0	0	1	0
group_1256	0	0	0	0	0	0	0	0	0	0	0	4	0
group_126	0	0	0	0	0	0	0	1	0	0	0	0	0
group_1260	0	0	0	0	0	0	0	0	0	0	1	0	0
group_1263	0	0	0	0	0	0	0	3	0	0	0	0	0
group_1264	0	0	0	0	0	0	0	1	0	0	0	0	0
group_1266	0	0	0	1	0	0	0	0	0	0	0	0	0
group_1270	0	0	0	0	0	0	0	1	0	0	0	0	0
group_1274	0	0	0	0	0	0	0	0	0	1	0	0	0
group_1279	0	0	0	0	0	0	0	0	0	9	0	0	0
group_1283	0	0	0	0	0	0	0	8	0	0	0	0	0
group_1284	0	0	0	0	0	0	0	0	0	1	0	0	0
group_1286	0	0	0	0	0	0	0	0	0	1	0	0	0
group_1289	0	0	0	0	0	0	0	1	0	0	0	0	0
group_1292	0	0	0	0	0	0	0	1	0	0	0	0	0
group_1302	0	0	0	0	0	0	0	1	0	0	0	0	0
group_1304	0	0	0	0	0	0	0	1	0	0	0	0	0
group_1305	0	0	0	0	0	0	0	2	0	0	0	0	0
group_1306	0	0	0	0	0	0	0	1	0	0	0	0	0
group_1307	0	0	0	0	0	0	0	1	0	0	0	0	0
group_1310	0	0	0	0	0	0	0	1	0	0	0	0	0
group_1311	0	0	0	0	0	0	0	1	0	0	0	0	0
group_1312	0	0	0	0	0	0	1	0	0	0	0	0	0
group_1314	0	0	0	0	0	0	0	1	0	0	0	0	0
group_1315	0	0	0	0	0	0	0	3	0	0	0	0	0
group_1317	0	0	0	0	0	0	0	5	0	0	0	0	0
group_1322	0	0	0	0	0	0	0	1	0	0	0	0	0
group_1324	0	0	0	0	0	0	0	0	0	0	0	6	0
group_1327	0	0	0	0	0	0	0	1	0	0	0	0	0
group_1328	0	0	0	0	0	0	0	1	0	0	0	0	0
group_1336	0	0	0	0	0	0	0	1	0	0	0	0	0
group_1338	0	0	0	0	0	0	0	0	0	1	0	0	0
group_1339	0	0	0	0	1	0	0	0	0	0	0	0	0
group_1340	0	0	0	0	0	0	0	2	0	0	0	0	0
group_1341	0	0	0	0	0	0	0	1	0	0	0	0	0
group_1342	0	0	0	0	0	0	0	8	0	0	0	0	0
group_1343	0	0	0	0	0	0	0	2	0	0	0	0	0
group_1344	0	0	0	0	0	0	0	10	0	0	0	0	0
group_1345	0	0	0	0	0	0	0	1	0	0	0	0	0
group_1346	0	0	0	0	0	0	0	2	0	0	0	0	0
group_1347	0	0	0	0	0	0	0	4	0	0	0	0	0
group_1348	0	0	0	0	0	0	0	3	0	0	0	0	0
group_135	0	0	0	0	0	0	0	1	0	0	0	0	0
group_1350	0	0	0	0	0	0	0	1	0	0	0	0	0
group_1356	0	0	0	0	0	0	0	0	0	1	0	0	0
group_136	0	0	0	0	0	0	0	2	0	0	0	0	0
group_1361	0	0	0	0	0	0	0	2	0	0	0	0	0
group_1366	0	0	0	1	0	0	0	0	0	0	0	0	0
group_1369	0	0	0	0	0	0	0	1	0	0	0	0	0
group_137	0	0	0	0	0	0	0	1	0	0	0	0	0
group_1372	0	0	0	0	0	0	0	1	0	0	0	0	0
group_1379	0	0	0	0	0	0	0	0	0	0	0	1	0
group_1383	0	0	0	0	0	0	0	1	0	0	0	0	0
group_1387	0	0	0	0	0	0	0	0	0	2	0	0	0
group_1394	0	0	0	0	0	0	0	0	0	1	0	0	0
group_1395	0	0	0	0	0	0	0	0	0	1	0	0	0
group_1396	0	0	0	0	0	0	0	2	0	0	0	0	0
group_1397	0	0	0	0	0	0	0	1	0	0	0	0	0
group_1400	0	0	0	0	0	0	0	0	0	1	0	0	0
group_1401	0	0	0	0	0	0	0	0	0	1	0	0	0
group_1402	0	0	0	0	0	0	0	0	0	3	0	0	0
group_1404	0	0	0	0	0	0	0	1	0	0	0	0	0
group_1406	0	0	0	0	0	0	0	1	0	0	0	0	0
group_1408	0	0	0	0	0	0	0	1	0	0	0	0	0
group_141	0	0	0	0	0	0	0	1	0	0	0	0	0
group_1417	0	0	0	0	0	0	0	0	0	1	0	0	0
group_142	0	0	0	0	0	0	0	10	0	0	0	0	0
group_1426	0	0	0	0	0	0	0	1	0	0	0	0	0
group_1428	0	0	0	0	0	0	0	1	0	0	0	0	0
group_1431	0	0	0	0	0	0	0	1	0	0	0	0	0
group_1434	0	0	0	0	0	0	0	5	0	0	0	0	0
group_1436	0	0	0	0	0	0	0	1	0	0	0	0	0
group_1437	0	0	0	0	0	0	0	1	0	0	0	0	0
group_1438	0	0	0	0	0	0	0	1	0	0	0	0	0
group_1441	0	0	0	0	0	0	0	0	0	1	0	0	0
group_1443	0	0	0	0	0	0	0	1	0	0	0	0	0
group_1445	0	0	0	0	0	0	0	0	0	1	0	0	0
group_1446	0	0	0	0	0	0	0	1	0	0	0	0	0
group_1447	0	0	0	0	0	0	0	1	0	0	0	0	0
group_145	0	0	0	0	0	0	0	1	0	0	0	0	0
group_1454	0	0	0	0	0	0	0	0	0	1	0	0	0
group_1456	0	0	0	0	0	0	0	1	0	0	0	0	0
group_1457	0	0	0	0	0	0	0	1	0	0	0	0	0
group_1458	0	0	0	0	0	0	0	10	0	0	0	0	0
group_1463	0	0	0	0	0	0	0	1	0	0	0	0	0
group_147	0	0	0	0	0	0	0	0	0	0	0	2	0
group_1471	0	0	0	0	0	0	0	0	0	1	0	0	0
group_1474	0	0	0	0	0	0	0	1	0	0	0	0	0
group_1475	0	0	0	0	0	0	0	1	0	0	0	0	0
group_1476	0	0	0	0	0	0	0	1	0	0	0	0	0
group_1484	0	0	0	0	0	0	0	1	0	0	0	0	0
group_1485	0	0	0	0	0	0	0	1	0	0	0	0	0
group_1488	0	0	0	0	0	0	0	1	0	0	0	0	0
group_15	0	0	0	1	0	0	0	0	0	0	0	0	0
group_1503	0	0	0	0	0	0	0	1	0	0	0	0	0
group_1504	0	0	0	0	0	0	0	1	0	0	0	0	0
group_1505	0	0	0	0	0	0	0	1	0	0	0	0	0
group_1506	0	0	0	0	0	0	0	2	0	0	0	0	0
group_1507	0	0	0	0	0	0	0	2	0	0	0	0	0
group_1508	0	0	0	0	0	0	0	1	0	0	0	0	0
group_1509	0	0	0	0	0	0	0	1	0	0	0	0	0
group_151	0	0	0	0	0	0	0	1	0	0	0	0	0
group_1512	0	0	0	0	0	0	0	1	0	0	0	0	0
group_1514	0	0	0	0	0	0	0	1	0	0	0	0	0
group_1519	0	0	0	0	0	0	0	3	0	0	0	0	0
group_1523	0	0	0	0	0	0	0	1	0	0	0	0	0
group_1524	0	0	0	0	0	0	0	1	0	0	0	0	0
group_1531	0	0	0	0	0	0	0	1	0	0	0	0	0
group_1538	0	0	0	0	0	0	0	0	0	1	0	0	0
group_1540	0	0	0	0	0	0	0	0	0	0	0	1	0
group_1543	0	0	0	0	0	0	0	7	0	0	0	0	0
group_1546	0	0	0	0	0	0	0	2	0	0	0	0	0
group_155	0	0	0	0	0	0	0	1	0	0	0	0	0
group_1550	0	0	0	0	0	0	0	16	0	0	0	0	0
group_1554	0	0	0	0	0	0	0	0	0	1	0	0	0
group_1555	0	0	0	0	0	0	0	1	0	0	0	0	0
group_1556	0	0	0	0	0	0	0	0	0	1	0	0	0
group_1557	0	0	0	0	0	0	0	0	0	1	0	0	0
group_156	0	0	1	0	0	0	0	0	0	0	0	0	0
group_1560	0	0	0	0	0	0	0	0	0	1	0	0	0
group_1564	0	0	0	0	0	0	0	1	0	0	0	0	0
group_1567	0	0	0	0	0	0	0	4	0	0	0	0	0
group_1582	0	0	0	0	0	0	0	1	0	0	0	0	0
group_1584	0	0	0	0	0	0	0	0	0	1	0	0	0
group_1587	0	0	0	0	0	0	0	1	0	0	0	0	0
group_1588	0	0	0	0	0	0	0	1	0	0	0	0	0
group_1589	0	0	0	0	0	0	0	1	0	0	0	0	0
group_1597	0	0	0	0	0	0	0	11	0	0	0	0	0
group_1598	0	0	0	0	0	0	0	2	0	0	0	0	0
group_1601	0	0	0	0	0	0	0	2	0	0	0	0	0
group_1603	0	0	0	0	0	0	0	6	0	0	0	0	0
group_1604	0	0	0	0	0	0	0	1	0	0	0	0	0
group_1605	0	0	0	0	0	0	0	2	0	0	0	0	0
group_1606	0	0	0	0	0	0	0	0	0	1	0	0	0
group_1607	0	0	0	0	0	0	0	5	0	0	0	0	0
group_1610	0	0	0	0	0	0	0	1	0	0	0	0	0
group_1611	0	0	0	0	0	0	0	1	0	0	0	0	0
group_1612	0	0	0	0	1	0	0	0	0	0	0	0	0
group_1613	0	0	0	0	1	0	0	0	0	0	0	0	0
group_1614	0	0	0	0	0	0	0	3	0	0	0	0	0
group_1619	0	0	0	0	0	0	0	0	0	0	1	0	0
group_1622	0	0	0	0	0	0	0	1	0	0	0	0	0
group_1623	0	0	0	0	0	0	0	1	0	0	0	0	0
group_1624	0	0	0	0	0	0	0	2	0	0	0	0	0
group_1634	0	0	0	0	0	0	0	0	0	3	0	0	0
group_164	0	0	0	0	0	0	0	2	0	0	0	0	0
group_1640	0	0	0	0	0	0	0	1	0	0	0	0	0
group_1643	0	0	0	0	0	0	0	0	0	1	0	0	0
group_165	0	0	0	0	0	0	0	2	0	0	0	0	0
group_1652	0	0	0	0	0	0	1	0	0	0	0	0	0
group_1654	0	0	0	0	0	0	0	1	0	0	0	0	0
group_1658	0	0	0	0	0	0	0	2	0	0	0	0	0
group_1659	0	0	0	0	0	0	0	0	0	0	0	1	0
group_166	0	0	0	0	0	0	0	1	0	0	0	0	0
group_1660	0	0	0	0	0	0	0	1	0	0	0	0	0
group_1661	0	0	0	0	0	0	0	1	0	0	0	0	0
group_1669	0	0	0	0	0	0	0	0	0	0	0	1	0
group_167	0	0	0	0	0	0	0	0	0	1	0	0	0
group_1675	0	0	0	0	0	0	0	8	0	0	0	0	0
group_1677	0	0	0	0	0	0	0	1	0	0	0	0	0
group_1680	0	0	0	0	0	0	0	28	0	0	0	0	0
group_1684	0	0	0	0	0	0	0	1	0	0	0	0	0
group_1687	0	0	0	0	0	0	0	0	0	2	0	0	0
group_1693	0	0	0	0	0	0	0	0	0	2	0	0	0
group_1695	0	0	0	0	0	0	0	0	0	1	0	0	0
group_1696	0	0	0	0	0	0	0	0	0	1	0	0	0
group_1697	0	0	0	0	0	0	0	1	0	0	0	0	0
group_1698	0	0	0	0	0	0	0	1	0	0	0	0	0
group_171	0	0	0	0	0	0	0	0	0	1	0	0	0
group_1711	0	0	0	0	0	0	0	0	0	1	0	0	0
group_1720	0	0	0	0	0	0	0	0	0	1	0	0	0
group_1724	0	0	0	0	0	0	0	1	0	0	0	0	0
group_1725	0	0	0	0	0	0	0	0	0	1	0	0	0
group_1731	0	0	0	0	0	0	0	0	0	1	0	0	0
group_1737	0	0	0	0	0	0	0	1	0	0	0	0	0
group_1741	0	0	0	0	0	0	0	0	0	1	0	0	0
group_1742	0	0	0	0	0	0	0	0	0	1	0	0	0
group_1745	0	0	0	0	0	0	0	2	0	0	0	0	0
group_1746	0	0	0	0	0	0	0	0	0	2	0	0	0
group_1748	0	0	0	0	0	0	0	3	0	0	0	0	0
group_1756	0	0	0	0	0	0	0	0	0	1	0	0	0
group_176	0	0	0	0	0	0	0	0	0	1	0	0	0
group_1767	0	0	0	0	0	0	0	0	0	2	0	0	0
group_1769	0	0	0	0	0	0	0	1	0	0	0	0	0
group_1771	0	0	0	0	0	0	0	1	0	0	0	0	0
group_1778	0	0	0	0	0	0	0	1	0	0	0	0	0
group_1787	0	0	0	0	0	0	0	0	0	1	0	0	0
group_1789	0	0	0	0	0	0	0	2	0	0	0	0	0
group_1790	0	0	0	0	0	0	0	1	0	0	0	0	0
group_1795	0	0	0	0	0	0	0	0	0	1	0	0	0
group_1797	0	0	0	0	0	0	0	0	0	1	0	0	0
group_1798	0	0	0	0	0	0	0	0	0	1	0	0	0
group_1799	0	0	0	0	0	0	0	1	0	0	0	0	0
group_180	0	0	0	1	0	0	0	0	0	0	0	0	0
group_1815	0	0	0	0	0	0	0	1	0	0	0	0	0
group_1826	0	0	0	0	0	0	0	1	0	0	0	0	0
group_1827	0	0	0	0	0	0	0	0	0	1	0	0	0
group_1829	0	0	0	0	0	0	0	1	0	0	0	0	0
group_183	0	0	0	0	0	0	0	5	0	0	0	0	0
group_1837	0	0	0	0	0	0	0	3	0	0	0	0	0
group_1844	0	0	0	0	0	0	0	1	0	0	0	0	0
group_1846	0	0	0	0	0	0	0	6	0	0	0	0	0
group_1853	0	0	0	0	0	0	0	0	0	3	0	0	0
group_1857	0	0	0	0	0	0	0	2	0	0	0	0	0
group_1859	0	0	0	0	0	0	0	1	0	0	0	0	0
group_1862	0	0	0	0	0	0	0	1	0	0	0	0	0
group_1865	0	0	0	0	0	0	0	1	0	0	0	0	0
group_1867	0	0	0	0	0	0	0	1	0	0	0	0	0
group_1869	0	0	0	0	0	0	0	0	0	0	1	0	0
group_187	0	0	0	1	0	0	0	0	0	0	0	0	0
group_1870	0	0	0	0	0	0	0	1	0	0	0	0	0
group_1873	0	0	0	0	0	0	0	1	0	0	0	0	0
group_1874	0	0	0	0	0	0	0	3	0	0	0	0	0
group_1878	0	0	0	0	0	0	0	0	0	1	0	0	0
group_1884	0	0	0	0	0	0	0	1	0	0	0	0	0
group_1899	0	0	0	0	0	0	0	0	0	1	0	0	0
group_1902	0	0	0	0	0	0	0	1	0	0	0	0	0
group_1905	0	0	0	0	0	0	0	1	0	0	0	0	0
group_1924	0	0	0	0	0	0	0	0	0	1	0	0	0
group_1927	0	0	0	0	0	0	0	0	0	4	0	0	0
group_1929	0	0	0	0	0	0	0	0	0	4	0	0	0
group_193	0	0	0	0	0	0	0	1	0	0	0	0	0
group_1930	0	0	0	0	0	0	0	0	0	3	0	0	0
group_1931	0	0	0	0	0	0	0	0	0	1	0	0	0
group_1943	0	0	0	0	0	0	0	0	0	1	0	0	0
group_1946	0	0	0	0	0	0	0	0	0	1	0	0	0
group_195	0	0	0	0	0	0	0	1	0	0	0	0	0
group_196	0	0	0	0	0	0	0	0	0	2	0	0	0
group_1960	0	0	0	0	0	0	0	0	0	1	0	0	0
group_1965	0	0	0	0	0	0	0	0	0	1	0	0	0
group_1968	0	0	0	0	0	0	0	0	0	1	0	0	0
group_197	0	0	0	0	0	0	0	2	0	0	0	0	0
group_1974	0	0	0	1	0	0	0	0	0	0	0	0	0
group_1986	0	0	0	0	0	0	0	1	0	0	0	0	0
group_1994	0	0	0	0	0	0	0	0	0	1	0	0	0
group_2002	0	0	0	0	0	0	0	0	0	2	0	0	0
group_2006	0	0	0	0	0	0	0	1	0	0	0	0	0
group_2008	0	0	0	0	0	0	0	3	0	0	0	0	0
group_2011	0	0	0	0	0	0	0	1	0	0	0	0	0
group_2012	0	0	0	0	0	0	0	1	0	0	0	0	0
group_2016	0	0	0	0	0	0	0	1	0	0	0	0	0
group_2025	0	0	0	0	0	0	0	2	0	0	0	0	0
group_2026	0	0	0	0	0	0	0	0	0	0	2	0	0
group_2027	0	0	0	0	0	0	0	2	0	0	0	0	0
group_2028	0	0	0	0	0	0	0	1	0	0	0	0	0
group_2031	0	0	0	0	0	0	0	1	0	0	0	0	0
group_2037	0	0	0	0	0	0	0	1	0	0	0	0	0
group_2038	0	0	0	0	0	0	0	4	0	0	0	0	0
group_2049	0	0	0	0	1	0	0	0	0	0	0	0	0
group_2050	0	0	0	0	0	0	0	2	0	0	0	0	0
group_2054	0	0	0	0	0	0	0	1	0	0	0	0	0
group_2055	0	0	0	0	0	0	0	1	0	0	0	0	0
group_2056	0	0	0	0	0	0	0	1	0	0	0	0	0
group_2059	0	0	0	0	0	0	0	1	0	0	0	0	0
group_2064	0	0	0	0	0	0	0	0	0	1	0	0	0
group_2067	0	0	0	0	0	0	0	1	0	0	0	0	0
group_2078	0	0	0	0	0	0	0	0	0	1	0	0	0
group_2086	0	0	1	0	0	0	0	0	0	0	0	0	0
group_2090	0	0	0	0	0	0	0	3	0	0	0	0	0
group_2091	0	0	0	0	0	0	0	1	0	0	0	0	0
group_2092	0	0	0	0	0	0	0	1	0	0	0	0	0
group_2093	0	0	0	0	0	0	0	1	0	0	0	0	0
group_2096	0	0	0	0	0	0	0	1	0	0	0	0	0
group_2097	0	0	0	0	0	0	0	0	0	2	0	0	0
group_2100	0	0	0	0	0	0	0	16	0	0	0	0	0
group_2113	0	0	0	0	0	0	0	1	0	0	0	0	0
group_2114	0	0	0	0	0	0	0	0	0	1	0	0	0
group_2116	0	0	0	0	0	0	0	2	0	0	0	0	0
group_2117	0	0	0	0	0	0	0	1	0	0	0	0	0
group_2118	0	0	0	0	0	0	0	4	0	0	0	0	0
group_2127	0	0	0	0	0	0	0	4	0	0	0	0	0
group_2128	0	0	0	0	0	0	0	13	0	0	0	0	0
group_213	0	0	0	0	0	0	0	1	0	0	0	0	0
group_2134	0	0	0	0	0	0	0	1	0	0	0	0	0
group_2135	0	0	0	0	0	0	0	0	0	0	1	0	0
group_2136	0	0	0	0	0	0	0	0	0	1	0	0	0
group_2140	0	0	0	0	0	0	0	0	0	2	0	0	0
group_2142	0	0	0	0	0	0	0	0	0	0	1	0	0
group_2144	0	0	0	0	0	0	0	0	0	1	0	0	0
group_2153	0	0	0	0	0	0	0	3	0	0	0	0	0
group_2155	0	0	0	0	0	0	0	1	0	0	0	0	0
group_2157	0	0	0	0	0	0	0	1	0	0	0	0	0
group_2158	0	0	0	0	0	0	0	3	0	0	0	0	0
group_2163	0	0	0	0	0	0	0	1	0	0	0	0	0
group_2167	0	0	0	0	0	0	0	3	0	0	0	0	0
group_2174	0	0	0	0	0	0	0	5	0	0	0	0	0
group_2176	0	0	0	0	0	0	0	6	0	0	0	0	0
group_2177	0	0	0	0	0	0	0	1	0	0	0	0	0
group_2181	0	0	0	0	0	0	0	0	0	2	0	0	0
group_2182	0	0	0	0	0	0	0	2	0	0	0	0	0
group_2183	0	0	0	0	0	0	0	1	0	0	0	0	0
group_2184	0	0	0	0	0	0	0	1	0	0	0	0	0
group_2185	0	0	0	0	0	0	0	2	0	0	0	0	0
group_2187	0	0	0	0	0	0	0	1	0	0	0	0	0
group_2188	0	0	0	0	0	0	0	1	0	0	0	0	0
group_2189	0	0	0	0	0	0	0	11	0	0	0	0	0
group_219	0	0	0	0	0	0	0	3	0	0	0	0	0
group_2190	0	0	0	0	0	0	0	2	0	0	0	0	0
group_2193	0	0	0	0	0	0	0	0	0	1	0	0	0
group_2196	0	0	0	0	0	0	0	0	0	1	0	0	0
group_22	0	0	0	0	0	0	0	2	0	0	0	0	0
group_2200	0	0	0	0	0	0	0	0	0	1	0	0	0
group_2210	0	0	0	0	0	0	0	0	0	4	0	0	0
group_2211	0	0	0	0	0	0	0	1	0	0	0	0	0
group_2217	0	0	0	0	0	0	0	0	0	1	0	0	0
group_2235	0	0	0	0	0	0	0	0	0	1	0	0	0
group_2236	0	0	0	0	0	0	0	0	0	1	0	0	0
group_2237	0	0	0	0	0	0	0	0	0	1	0	0	0
group_2239	0	0	0	0	0	0	0	1	0	0	0	0	0
group_2241	0	0	0	0	0	0	0	0	0	2	0	0	0
group_2242	0	0	0	0	0	0	0	0	0	1	0	0	0
group_2244	0	0	0	0	0	0	0	0	0	1	0	0	0
group_2246	0	0	0	0	0	0	0	0	0	1	0	0	0
group_2247	0	0	0	0	0	0	0	0	0	1	0	0	0
group_2252	0	0	0	0	0	0	0	0	0	2	0	0	0
group_2284	0	0	0	0	0	0	0	1	0	0	0	0	0
group_2293	0	0	0	0	0	0	0	1	0	0	0	0	0
group_2294	0	0	0	0	0	0	0	1	0	0	0	0	0
group_2295	0	0	0	0	0	0	0	2	0	0	0	0	0
group_2297	0	0	0	0	0	0	0	1	0	0	0	0	0
group_2299	0	0	0	0	0	0	0	4	0	0	0	0	0
group_2300	0	0	0	0	0	0	0	2	0	0	0	0	0
group_2301	0	0	0	0	0	0	0	3	0	0	0	0	0
group_2302	0	0	0	0	0	0	0	1	0	0	0	0	0
group_2303	0	0	0	0	0	0	0	1	0	0	0	0	0
group_2307	0	0	0	0	0	0	0	6	0	0	0	0	0
group_2308	0	0	0	0	0	0	0	3	0	0	0	0	0
group_2309	0	0	0	0	0	0	0	5	0	0	0	0	0
group_2310	0	0	0	0	0	0	0	4	0	0	0	0	0
group_2311	0	0	0	0	0	0	0	1	0	0	0	0	0
group_2315	0	0	0	0	0	0	0	1	0	0	0	0	0
group_2317	0	0	0	0	0	0	0	1	0	0	0	0	0
group_2318	0	0	0	0	0	0	0	2	0	0	0	0	0
group_2319	0	0	0	0	0	0	0	1	0	0	0	0	0
group_2321	0	0	0	0	0	0	0	0	0	0	0	1	0
group_2323	0	0	0	0	0	0	0	1	0	0	0	0	0
group_2324	0	0	0	0	0	0	0	1	0	0	0	0	0
group_2325	0	0	0	0	0	0	0	2	0	0	0	0	0
group_2328	0	0	0	0	0	0	0	1	0	0	0	0	0
group_2333	0	0	0	0	0	0	0	1	0	0	0	0	0
group_2334	0	0	0	0	0	0	0	6	0	0	0	0	0
group_2335	0	0	0	0	0	0	0	0	0	1	0	0	0
group_2336	0	0	0	1	0	0	0	0	0	0	0	0	0
group_2344	0	0	0	0	0	0	0	0	0	1	0	0	0
group_2353	0	0	0	0	0	0	0	1	0	0	0	0	0
group_2354	0	0	0	0	0	0	0	1	0	0	0	0	0
group_2359	0	0	0	0	0	0	0	1	0	0	0	0	0
group_2366	0	0	0	1	0	0	0	0	0	0	0	0	0
group_2371	0	0	0	0	0	0	0	0	0	1	0	0	0
group_2376	0	0	0	0	0	0	0	1	0	0	0	0	0
group_2385	0	0	0	0	0	0	0	6	0	0	0	0	0
group_2399	0	0	0	0	0	0	0	0	0	1	0	0	0
group_2415	0	0	0	0	0	0	0	1	0	0	0	0	0
group_2422	0	0	0	0	0	0	0	1	0	0	0	0	0
group_2423	0	0	0	0	0	0	0	2	0	0	0	0	0
group_2432	0	0	0	0	0	0	0	1	0	0	0	0	0
group_2433	0	0	0	0	0	0	0	1	0	0	0	0	0
group_2436	0	0	0	0	0	0	0	0	0	0	0	1	0
group_2439	0	0	0	0	0	0	0	1	0	0	0	0	0
group_244	0	0	0	0	0	0	0	1	0	0	0	0	0
group_2442	0	0	0	0	0	0	0	1	0	0	0	0	0
group_2446	0	0	0	0	0	0	0	0	1	0	0	0	0
group_2447	0	0	0	0	0	0	0	1	0	0	0	0	0
group_2448	0	0	0	0	0	0	0	1	0	0	0	0	0
group_2453	0	0	0	0	0	0	0	1	0	0	0	0	0
group_2460	0	0	0	1	0	0	0	0	0	0	0	0	0
group_2464	0	0	0	0	0	0	0	0	0	1	0	0	0
group_2465	0	0	0	0	0	0	0	1	0	0	0	0	0
group_247	0	0	0	0	0	0	0	2	0	0	0	0	0
group_2471	0	0	0	0	0	0	0	0	0	0	3	0	0
group_2472	0	0	0	0	0	0	0	1	0	0	0	0	0
group_248	0	0	0	0	0	0	0	2	0	0	0	0	0
group_2490	0	0	0	0	0	0	0	0	0	1	0	0	0
group_2504	0	0	0	0	0	0	0	1	0	0	0	0	0
group_2520	0	1	0	0	0	0	0	0	0	0	0	0	0
group_2521	0	0	0	0	0	0	0	1	0	0	0	0	0
group_2522	0	0	0	0	0	0	0	0	0	1	0	0	0
group_2528	0	0	0	0	0	0	0	1	0	0	0	0	0
group_2531	0	0	0	0	0	0	0	1	0	0	0	0	0
group_2532	0	0	0	0	0	0	0	20	0	0	0	0	0
group_2539	0	0	0	0	0	0	0	0	0	3	0	0	0
group_2542	0	0	0	0	0	0	0	0	0	3	0	0	0
group_2545	0	0	0	0	0	0	0	1	0	0	0	0	0
group_2546	0	0	0	0	0	0	0	1	0	0	0	0	0
group_2547	0	0	0	0	0	0	0	0	0	2	0	0	0
group_2551	0	0	0	0	0	0	0	2	0	0	0	0	0
group_2554	0	0	0	0	0	0	0	0	0	1	0	0	0
group_256	0	0	0	0	0	0	0	0	0	1	0	0	0
group_2581	0	0	0	0	0	0	0	0	0	1	0	0	0
group_2584	0	0	0	0	0	0	0	1	0	0	0	0	0
group_2590	0	0	0	0	0	0	0	1	0	0	0	0	0
group_2596	0	0	0	0	0	0	0	1	0	0	0	0	0
group_2599	0	0	0	0	0	0	0	1	0	0	0	0	0
group_26	0	0	0	1	0	0	0	0	0	0	0	0	0
group_2600	0	0	0	0	0	0	0	1	0	0	0	0	0
group_2602	0	0	0	0	0	0	0	0	0	1	0	0	0
group_2603	0	0	0	0	0	0	0	0	0	1	0	0	0
group_2604	0	0	0	1	0	0	0	0	0	0	0	0	0
group_2605	0	0	0	1	0	0	0	0	0	0	0	0	0
group_2606	0	0	0	0	0	0	0	0	0	1	0	0	0
group_2612	0	0	0	0	0	0	0	1	0	0	0	0	0
group_2613	0	0	0	0	0	0	0	1	0	0	0	0	0
group_2616	0	0	0	0	0	0	1	0	0	0	0	0	0
group_2617	0	0	0	0	0	0	0	8	0	0	0	0	0
group_2622	0	0	0	0	0	0	0	11	0	0	0	0	0
group_2626	0	0	0	0	0	0	0	1	0	0	0	0	0
group_2627	0	0	0	0	0	0	0	13	0	0	0	0	0
group_2631	0	0	0	0	0	0	0	1	0	0	0	0	0
group_2635	0	0	0	0	0	0	0	7	0	0	0	0	0
group_2636	0	0	0	0	0	0	0	1	0	0	0	0	0
group_2641	0	0	0	0	0	0	0	1	0	0	0	0	0
group_2648	0	0	0	0	0	0	0	0	0	1	0	0	0
group_265	0	0	0	0	0	0	0	4	0	0	0	0	0
group_2650	0	0	0	0	0	0	0	26	0	0	0	0	0
group_2651	0	0	0	0	0	0	0	0	0	1	0	0	0
group_2652	0	0	0	0	0	0	0	0	0	1	0	0	0
group_2653	0	0	0	0	0	0	0	2	0	0	0	0	0
group_2654	0	0	0	0	0	0	0	2	0	0	0	0	0
group_2656	0	0	0	0	0	0	0	1	0	0	0	0	0
group_2658	0	0	0	0	0	0	0	5	0	0	0	0	0
group_2661	0	0	0	0	0	0	0	1	0	0	0	0	0
group_2662	0	0	0	0	0	0	0	1	0	0	0	0	0
group_2667	0	0	0	0	0	0	0	1	0	0	0	0	0
group_2668	0	0	0	0	0	0	0	0	0	1	0	0	0
group_2671	0	0	0	0	0	0	0	1	0	0	0	0	0
group_2676	0	0	0	0	0	0	0	1	0	0	0	0	0
group_268	0	0	0	0	0	0	0	0	0	1	0	0	0
group_2701	0	0	0	0	0	0	0	1	0	0	0	0	0
group_271	0	0	0	0	0	0	0	0	0	0	1	0	0
group_2721	0	0	0	0	0	0	0	0	0	1	0	0	0
group_273	0	0	0	0	0	0	0	4	0	0	0	0	0
group_2741	0	0	0	0	0	0	0	0	0	1	0	0	0
group_2750	0	0	0	0	0	0	0	0	0	0	1	0	0
group_2754	0	0	0	0	0	0	0	2	0	0	0	0	0
group_2755	0	0	0	0	0	0	0	0	0	1	0	0	0
group_2757	0	0	0	0	0	0	0	2	0	0	0	0	0
group_2760	0	0	0	0	0	0	0	2	0	0	0	0	0
group_2761	0	0	0	0	0	0	0	2	0	0	0	0	0
group_2762	0	0	0	0	0	0	0	3	0	0	0	0	0
group_2763	0	0	0	0	0	0	0	2	0	0	0	0	0
group_2767	0	0	0	0	0	0	0	0	0	1	0	0	0
group_277	0	0	0	0	0	0	0	1	0	0	0	0	0
group_2772	0	0	0	0	0	0	0	1	0	0	0	0	0
group_2773	0	0	0	0	0	0	0	1	0	0	0	0	0
group_2774	0	0	0	0	0	0	0	3	0	0	0	0	0
group_2775	0	0	0	0	0	0	0	2	0	0	0	0	0
group_2776	0	0	0	0	0	0	0	1	0	0	0	0	0
group_2777	0	0	0	0	0	0	0	1	0	0	0	0	0
group_2778	0	0	0	0	0	0	0	0	0	1	0	0	0
group_2779	0	0	0	0	0	0	0	0	0	1	0	0	0
group_2780	0	0	0	0	0	0	0	0	0	1	0	0	0
group_2781	0	0	0	0	0	0	0	0	0	1	0	0	0
group_2782	0	0	0	0	0	0	0	0	0	1	0	0	0
group_2783	0	0	0	0	0	0	0	0	0	1	0	0	0
group_2784	0	0	0	0	0	0	0	0	0	1	0	0	0
group_2786	0	0	0	0	0	0	0	0	0	2	0	0	0
group_2787	0	0	0	0	0	0	0	0	0	1	0	0	0
group_2789	0	0	0	0	0	0	0	0	0	1	0	0	0
group_279	0	0	0	0	0	0	0	0	0	0	1	0	0
group_2790	0	0	0	0	0	0	0	0	0	1	0	0	0
group_2791	0	0	0	0	0	0	0	0	0	1	0	0	0
group_2792	0	0	0	0	0	0	0	0	0	1	0	0	0
group_2793	0	0	0	0	0	0	0	0	0	1	0	0	0
group_2794	0	0	0	0	0	0	0	0	0	1	0	0	0
group_2795	0	0	0	0	0	0	0	0	0	1	0	0	0
group_2796	0	0	0	0	0	0	0	0	0	1	0	0	0
group_28	0	0	0	0	0	0	0	1	0	0	0	0	0
group_2803	0	0	0	0	0	0	0	1	0	0	0	0	0
group_2804	0	0	0	0	0	0	0	0	0	0	0	2	0
group_2807	0	0	1	0	0	0	0	0	0	0	0	0	0
group_281	0	0	0	0	0	0	0	1	0	0	0	0	0
group_2813	0	0	0	0	0	0	0	1	0	0	0	0	0
group_2819	0	0	0	0	0	0	0	11	0	0	0	0	0
group_2821	0	0	0	0	0	0	0	1	0	0	0	0	0
group_2824	0	0	0	0	0	0	0	4	0	0	0	0	0
group_2826	0	0	0	0	0	0	0	1	0	0	0	0	0
group_2828	0	0	0	0	0	0	0	1	0	0	0	0	0
group_2829	0	0	0	0	0	0	0	1	0	0	0	0	0
group_2838	0	0	0	0	0	0	0	1	0	0	0	0	0
group_2843	0	0	0	0	0	0	0	1	0	0	0	0	0
group_2845	0	0	0	0	0	0	0	1	0	0	0	0	0
group_2846	0	0	0	0	0	0	1	0	0	0	0	0	0
group_2854	0	0	0	1	0	0	0	0	0	0	0	0	0
group_2855	0	0	0	0	0	0	0	0	0	1	0	0	0
group_2857	0	0	0	0	0	0	0	0	0	1	0	0	0
group_2858	0	0	0	0	0	0	0	0	0	1	0	0	0
group_2860	0	0	0	0	0	0	0	0	0	1	0	0	0
group_2862	0	0	0	0	0	0	0	1	0	0	0	0	0
group_2863	0	0	0	0	0	0	0	0	0	1	0	0	0
group_2864	0	0	0	0	0	0	0	1	0	0	0	0	0
group_2866	0	0	0	0	0	0	0	1	0	0	0	0	0
group_2867	0	0	0	0	0	0	0	1	0	0	0	0	0
group_2868	0	0	0	0	0	0	0	1	0	0	0	0	0
group_2869	0	0	0	0	0	0	0	2	0	0	0	0	0
group_2870	0	0	0	0	0	0	0	14	0	0	0	0	0
group_2872	0	0	0	0	0	0	0	6	0	0	0	0	0
group_2876	0	0	0	0	0	0	0	0	0	1	0	0	0
group_2879	0	0	0	0	0	0	0	2	0	0	0	0	0
group_2880	0	0	0	0	0	0	0	1	0	0	0	0	0
group_2881	0	0	0	0	0	0	0	1	0	0	0	0	0
group_2882	0	0	0	0	0	0	0	2	0	0	0	0	0
group_2885	0	0	0	0	0	0	0	0	0	0	0	1	0
group_2888	0	0	0	0	0	0	1	0	0	0	0	0	0
group_289	0	0	0	0	0	0	0	1	0	0	0	0	0
group_2897	0	0	0	0	0	0	0	1	0	0	0	0	0
group_2898	0	0	0	0	0	0	0	0	0	1	0	0	0
group_29	0	0	0	0	0	0	0	1	0	0	0	0	0
group_2900	0	0	0	0	0	0	0	2	0	0	0	0	0
group_2901	0	0	0	0	0	0	0	1	0	0	0	0	0
group_2902	0	0	0	0	0	0	0	1	0	0	0	0	0
group_2903	0	0	0	0	0	0	0	1	0	0	0	0	0
group_2905	0	0	0	0	0	0	0	1	0	0	0	0	0
group_2912	0	0	0	0	0	0	0	2	0	0	0	0	0
group_2913	0	0	0	0	0	0	0	0	0	2	0	0	0
group_2914	0	0	0	0	0	0	0	0	0	1	0	0	0
group_2918	0	0	0	0	0	0	0	1	0	0	0	0	0
group_292	0	0	0	0	0	0	0	0	0	0	0	1	0
group_2927	0	0	0	0	0	0	0	2	0	0	0	0	0
group_2929	0	0	0	0	0	0	0	2	0	0	0	0	0
group_293	0	0	0	0	0	0	0	0	0	0	0	4	0
group_2930	0	0	0	0	0	0	0	1	0	0	0	0	0
group_2954	0	0	0	0	0	0	0	0	0	1	0	0	0
group_2955	0	0	0	0	0	0	0	1	0	0	0	0	0
group_2956	0	0	0	0	0	0	0	0	0	1	0	0	0
group_2959	0	0	0	0	0	0	0	0	0	2	0	0	0
group_2972	0	0	0	0	0	0	0	1	0	0	0	0	0
group_2985	0	0	0	0	0	0	0	1	0	0	0	0	0
group_3001	0	0	0	0	0	0	0	1	0	0	0	0	0
group_3004	0	0	0	0	0	0	0	1	0	0	0	0	0
group_301	0	0	0	0	0	0	0	0	0	1	0	0	0
group_3010	0	0	0	1	0	0	0	0	0	0	0	0	0
group_3028	0	0	0	0	0	0	0	1	0	0	0	0	0
group_3056	0	0	0	0	0	0	0	0	0	1	0	0	0
group_3061	0	0	0	0	0	0	0	0	0	1	0	0	0
group_3075	0	0	0	0	0	0	0	1	0	0	0	0	0
group_308	0	0	0	0	0	0	0	11	0	0	0	0	0
group_3087	0	0	0	0	0	0	0	3	0	0	0	0	0
group_3090	0	0	0	0	0	0	0	0	0	2	0	0	0
group_31	0	0	0	0	0	0	0	1	0	0	0	0	0
group_310	0	0	0	0	0	0	0	8	0	0	0	0	0
group_3102	0	0	0	0	0	0	0	1	0	0	0	0	0
group_311	0	0	0	2	0	0	0	0	0	0	0	0	0
group_3115	0	0	0	0	0	0	0	9	0	0	0	0	0
group_3118	0	0	0	0	0	0	0	2	0	0	0	0	0
group_312	0	0	0	0	0	0	0	0	0	0	1	0	0
group_3121	0	0	0	0	0	0	0	3	0	0	0	0	0
group_3125	0	0	0	0	0	0	0	2	0	0	0	0	0
group_3126	0	0	0	0	0	0	0	2	0	0	0	0	0
group_3129	0	0	0	0	0	0	0	1	0	0	0	0	0
group_3130	0	0	0	0	0	0	0	1	0	0	0	0	0
group_3131	0	0	0	0	0	0	0	1	0	0	0	0	0
group_3132	0	0	0	0	0	0	0	5	0	0	0	0	0
group_3133	0	0	0	0	0	0	0	1	0	0	0	0	0
group_3135	0	0	0	0	0	0	0	9	0	0	0	0	0
group_3136	0	0	0	0	0	0	0	1	0	0	0	0	0
group_3137	0	0	0	0	0	0	0	3	0	0	0	0	0
group_3139	0	0	0	0	0	0	0	1	0	0	0	0	0
group_3140	0	0	0	0	0	0	0	0	0	1	0	0	0
group_3141	0	0	0	0	0	0	0	6	0	0	0	0	0
group_3142	0	0	0	0	0	0	0	2	0	0	0	0	0
group_3143	0	0	0	0	0	0	0	1	0	0	0	0	0
group_3144	0	0	0	0	0	0	0	3	0	0	0	0	0
group_3146	0	0	0	0	0	0	0	1	0	0	0	0	0
group_3147	0	0	0	0	0	0	0	1	0	0	0	0	0
group_3148	0	0	0	0	0	0	0	6	0	0	0	0	0
group_3149	0	0	0	0	0	0	0	6	0	0	0	0	0
group_3150	0	0	0	0	0	0	0	1	0	0	0	0	0
group_3152	0	0	0	0	0	0	0	2	0	0	0	0	0
group_3153	0	0	0	0	0	0	0	6	0	0	0	0	0
group_3154	0	0	0	0	0	0	0	1	0	0	0	0	0
group_3155	0	0	0	0	0	0	0	1	0	0	0	0	0
group_3156	0	0	0	0	0	0	0	1	0	0	0	0	0
group_3159	0	0	0	0	0	0	0	1	0	0	0	0	0
group_316	0	0	0	0	0	0	0	1	0	0	0	0	0
group_3161	0	0	0	0	0	0	0	3	0	0	0	0	0
group_3164	0	0	0	0	0	0	0	1	0	0	0	0	0
group_3166	0	0	0	0	0	0	0	1	0	0	0	0	0
group_3167	0	0	0	0	0	0	0	1	0	0	0	0	0
group_3169	0	0	0	0	0	0	0	0	0	0	0	6	0
group_3172	0	0	0	0	0	0	0	2	0	0	0	0	0
group_3174	0	0	0	0	0	0	0	1	0	0	0	0	0
group_3175	0	0	0	0	0	0	0	1	0	0	0	0	0
group_318	0	0	0	0	0	0	0	3	0	0	0	0	0
group_3181	0	0	0	0	0	0	0	1	0	0	0	0	0
group_3190	0	0	0	0	0	0	0	1	0	0	0	0	0
group_3193	0	0	0	0	0	0	0	1	0	0	0	0	0
group_32	0	0	0	0	0	0	0	1	0	0	0	0	0
group_3200	0	0	0	0	0	0	0	0	0	1	0	0	0
group_3204	0	0	0	0	0	0	0	6	0	0	0	0	0
group_3205	0	0	0	0	0	0	0	0	0	1	0	0	0
group_3211	0	0	0	0	0	0	0	0	0	1	0	0	0
group_3217	0	0	0	0	0	0	0	1	0	0	0	0	0
group_322	0	0	0	0	0	0	0	10	0	0	0	0	0
group_3220	0	0	0	0	0	0	0	1	0	0	0	0	0
group_3221	0	0	0	0	0	0	0	1	0	0	0	0	0
group_3222	0	0	0	0	0	0	0	1	0	0	0	0	0
group_3223	0	0	0	0	0	0	0	1	0	0	0	0	0
group_3225	0	0	0	0	0	0	0	1	0	0	0	0	0
group_3228	0	0	0	0	0	0	0	2	0	0	0	0	0
group_323	0	0	0	0	0	0	0	3	0	0	0	0	0
group_3231	0	0	0	0	0	0	0	0	0	1	0	0	0
group_3232	0	0	0	0	0	0	0	0	0	1	0	0	0
group_3233	0	0	0	0	0	0	0	0	0	1	0	0	0
group_3234	0	0	0	0	0	0	0	0	0	1	0	0	0
group_3237	0	0	0	0	0	0	0	0	0	1	0	0	0
group_3238	0	0	0	0	0	0	0	0	0	1	0	0	0
group_3243	0	0	0	0	0	0	0	4	0	0	0	0	0
group_3244	0	0	0	0	0	0	0	1	0	0	0	0	0
group_3245	0	0	0	0	0	0	0	1	0	0	0	0	0
group_3246	0	0	0	0	0	0	0	2	0	0	0	0	0
group_3254	0	0	0	0	0	0	0	1	0	0	0	0	0
group_3287	0	0	0	0	0	0	0	1	0	0	0	0	0
group_3288	0	0	0	0	0	0	0	1	0	0	0	0	0
group_329	0	0	0	0	0	0	0	2	0	0	0	0	0
group_3294	0	0	0	0	0	0	0	0	0	1	0	0	0
group_3305	0	0	0	0	0	0	0	0	0	1	0	0	0
group_3318	0	0	0	0	0	0	0	14	0	0	0	0	0
group_332	0	0	0	0	0	0	0	2	0	0	0	0	0
group_3322	0	0	0	0	0	0	0	0	0	1	0	0	0
group_3323	0	0	0	0	0	0	0	0	0	4	0	0	0
group_3326	0	0	0	0	0	0	0	2	0	0	0	0	0
group_3327	0	0	0	0	0	0	0	1	0	0	0	0	0
group_3330	0	0	0	0	0	0	0	3	0	0	0	0	0
group_3336	0	0	0	0	0	0	0	1	0	0	0	0	0
group_3338	0	0	0	0	0	0	0	1	0	0	0	0	0
group_3339	0	0	0	0	0	0	0	2	0	0	0	0	0
group_3341	0	0	0	0	0	0	0	2	0	0	0	0	0
group_3343	0	0	0	0	0	0	0	2	0	0	0	0	0
group_3344	0	0	0	0	0	0	0	1	0	0	0	0	0
group_3352	0	0	0	0	0	0	0	3	0	0	0	0	0
group_3355	0	0	0	0	0	0	0	1	0	0	0	0	0
group_3374	0	0	0	0	0	0	0	2	0	0	0	0	0
group_3375	0	0	0	0	0	0	0	4	0	0	0	0	0
group_3376	0	0	0	0	0	0	0	2	0	0	0	0	0
group_3379	0	0	0	2	0	0	0	0	0	0	0	0	0
group_3380	0	0	0	0	0	0	0	2	0	0	0	0	0
group_3389	0	0	0	0	0	0	0	1	0	0	0	0	0
group_3403	0	0	0	0	0	0	0	0	0	4	0	0	0
group_3411	0	0	0	0	0	0	0	0	0	0	0	1	0
group_342	0	0	0	0	0	0	0	0	0	3	0	0	0
group_3424	0	0	0	0	0	0	0	33	0	0	0	0	0
group_343	0	0	0	0	0	0	0	0	0	1	0	0	0
group_3437	0	0	0	0	0	0	0	0	0	1	0	0	0
group_3440	0	0	0	0	0	0	0	2	0	0	0	0	0
group_3443	0	0	0	0	0	0	0	1	0	0	0	0	0
group_3444	0	0	0	0	0	0	0	5	0	0	0	0	0
group_3455	0	0	0	0	0	0	0	0	0	1	0	0	0
group_3456	0	0	0	0	0	0	0	1	0	0	0	0	0
group_3459	0	0	0	0	0	0	0	1	0	0	0	0	0
group_346	0	0	0	0	0	0	0	3	0	0	0	0	0
group_3461	0	0	0	0	0	0	0	0	0	1	0	0	0
group_3463	0	0	0	0	0	0	0	0	0	2	0	0	0
group_3464	0	0	0	0	0	0	0	0	0	2	0	0	0
group_3472	0	0	0	0	0	0	0	1	0	0	0	0	0
group_3477	0	0	0	0	0	0	0	1	0	0	0	0	0
group_3478	0	0	0	1	0	0	0	0	0	0	0	0	0
group_3481	0	0	0	0	0	0	0	1	0	0	0	0	0
group_3483	0	0	0	0	0	0	0	1	0	0	0	0	0
group_3484	0	0	0	0	0	0	0	0	0	1	0	0	0
group_3485	0	0	0	0	0	0	0	0	0	1	0	0	0
group_3486	0	0	0	0	0	0	0	1	0	0	0	0	0
group_349	0	0	0	0	0	0	0	0	0	1	0	0	0
group_3495	0	0	0	0	0	0	0	0	0	0	2	0	0
group_3496	0	0	0	0	0	0	0	0	0	0	2	0	0
group_3498	0	0	0	0	0	0	0	0	0	0	0	6	0
group_3499	0	0	0	0	0	0	0	0	0	0	0	1	0
group_350	0	0	0	0	0	0	0	13	0	0	0	0	0
group_3511	0	0	0	0	0	0	0	2	0	0	0	0	0
group_352	0	0	0	0	0	0	0	7	0	0	0	0	0
group_3521	0	0	0	0	0	0	0	1	0	0	0	0	0
group_3531	0	0	0	0	0	0	0	1	0	0	0	0	0
group_3537	0	0	0	0	0	0	0	1	0	0	0	0	0
group_355	0	0	0	0	0	0	0	1	0	0	0	0	0
group_3576	0	0	0	0	0	0	0	1	0	0	0	0	0
group_358	0	0	0	0	0	0	0	9	0	0	0	0	0
group_3586	0	0	0	0	0	0	0	0	0	4	0	0	0
group_3613	0	0	0	0	0	0	0	0	0	1	0	0	0
group_363	0	0	0	0	0	0	0	0	0	2	0	0	0
group_3634	0	0	0	0	0	0	0	1	0	0	0	0	0
group_3637	0	0	0	0	0	0	0	0	0	1	0	0	0
group_3640	0	0	0	0	0	0	0	0	0	5	0	0	0
group_3644	0	1	0	0	0	0	0	0	0	0	0	0	0
group_3661	0	0	0	0	0	0	0	0	0	1	0	0	0
group_3662	0	0	0	0	0	0	0	0	0	1	0	0	0
group_3663	0	0	0	0	0	0	0	0	0	1	0	0	0
group_3664	0	0	0	0	0	0	0	0	0	1	0	0	0
group_367	0	0	0	0	0	0	0	0	0	1	0	0	0
group_3672	0	0	0	0	0	0	0	1	0	0	0	0	0
group_3698	0	0	0	0	0	0	0	0	0	1	0	0	0
group_3700	0	0	0	0	0	0	0	0	0	1	0	0	0
group_3701	0	0	0	1	0	0	0	0	0	0	0	0	0
group_3702	0	0	0	0	0	0	0	0	0	2	0	0	0
group_3705	0	0	0	0	0	0	0	0	0	5	0	0	0
group_3708	0	0	0	0	0	0	0	0	0	1	0	0	0
group_371	0	0	0	0	0	0	0	0	0	2	0	0	0
group_3711	0	0	0	0	0	0	0	0	0	1	0	0	0
group_3712	0	0	0	0	0	0	0	1	0	0	0	0	0
group_3733	0	0	0	0	0	0	0	1	0	0	0	0	0
group_3752	0	0	0	1	0	0	0	0	0	0	0	0	0
group_376	0	0	0	0	0	0	1	0	0	0	0	0	0
group_3761	0	0	0	0	0	0	0	0	0	2	0	0	0
group_3762	0	0	0	0	0	0	0	1	0	0	0	0	0
group_3763	0	0	0	0	1	0	0	0	0	0	0	0	0
group_3764	0	0	0	0	0	0	0	1	0	0	0	0	0
group_3765	0	0	0	0	0	0	0	6	0	0	0	0	0
group_3768	0	0	0	0	0	0	0	4	0	0	0	0	0
group_3769	0	0	0	0	0	0	0	1	0	0	0	0	0
group_377	0	0	0	0	0	0	0	1	0	0	0	0	0
group_3772	0	0	0	0	0	0	0	1	0	0	0	0	0
group_3773	0	0	0	0	0	0	0	0	0	2	0	0	0
group_3775	0	0	0	0	0	0	0	0	0	1	0	0	0
group_3778	0	0	0	0	0	0	0	2	0	0	0	0	0
group_3784	0	0	0	0	0	0	0	1	0	0	0	0	0
group_3788	0	0	0	0	0	0	0	3	0	0	0	0	0
group_3791	0	0	0	0	0	0	0	4	0	0	0	0	0
group_3793	0	0	0	0	0	0	0	1	0	0	0	0	0
group_3794	0	0	0	0	0	0	0	5	0	0	0	0	0
group_3796	0	0	0	0	0	0	0	9	0	0	0	0	0
group_3797	0	0	0	0	0	0	0	1	0	0	0	0	0
group_3798	0	0	0	0	0	0	0	2	0	0	0	0	0
group_380	0	0	0	0	0	0	0	0	0	2	0	0	0
group_3817	0	0	0	0	0	0	0	0	0	1	0	0	0
group_3818	0	0	0	0	0	0	0	2	0	0	0	0	0
group_3819	0	0	0	0	0	0	0	1	0	0	0	0	0
group_3821	0	0	0	0	0	0	0	0	0	1	0	0	0
group_3823	0	0	0	0	0	0	0	1	0	0	0	0	0
group_3834	0	0	0	0	0	0	0	1	0	0	0	0	0
group_3835	0	0	0	0	0	0	0	0	0	1	0	0	0
group_3836	0	0	0	0	0	0	0	0	0	1	0	0	0
group_3838	0	0	0	0	0	0	0	0	0	1	0	0	0
group_3842	0	0	0	0	0	0	0	0	0	5	0	0	0
group_3853	0	0	0	0	0	0	0	1	0	0	0	0	0
group_3860	0	0	0	0	0	0	0	1	0	0	0	0	0
group_3872	0	0	0	0	0	0	0	0	0	2	0	0	0
group_3876	0	0	0	0	0	0	0	1	0	0	0	0	0
group_3879	0	0	0	0	0	0	0	0	0	4	0	0	0
group_389	0	0	0	0	0	0	1	0	0	0	0	0	0
group_3890	0	0	0	0	0	0	0	0	0	1	0	0	0
group_390	0	0	0	0	0	0	0	6	0	0	0	0	0
group_391	0	0	0	0	0	0	0	1	0	0	0	0	0
group_393	0	0	0	0	0	0	0	1	0	0	0	0	0
group_3935	0	0	0	0	0	0	0	1	0	0	0	0	0
group_3946	0	0	0	0	0	0	1	0	0	0	0	0	0
group_3951	0	0	0	0	0	0	0	1	0	0	0	0	0
group_3955	0	0	0	0	0	0	0	2	0	0	0	0	0
group_3958	0	0	0	0	0	0	0	1	0	0	0	0	0
group_3962	0	0	0	0	0	0	0	2	0	0	0	0	0
group_3967	0	0	0	0	0	0	0	2	0	0	0	0	0
group_397	0	0	0	0	0	0	0	1	0	0	0	0	0
group_3972	0	0	0	0	0	0	0	2	0	0	0	0	0
group_3980	0	0	0	0	0	0	0	0	0	1	0	0	0
group_3989	0	0	0	0	0	0	0	0	0	0	0	1	0
group_399	0	0	0	0	0	0	0	0	0	0	2	0	0
group_3994	0	0	0	0	0	0	0	12	0	0	0	0	0
group_3997	0	0	0	0	0	0	0	1	0	0	0	0	0
group_4	0	0	0	0	0	0	0	1	0	0	0	0	0
group_4001	0	0	0	0	0	0	0	1	0	0	0	0	0
group_4004	0	0	0	0	0	0	0	1	0	0	0	0	0
group_4008	0	0	0	0	0	0	0	25	0	0	0	0	0
group_4015	0	0	0	0	0	0	0	0	0	0	2	0	0
group_4023	0	0	0	0	0	0	0	0	0	1	0	0	0
group_4024	0	0	0	0	0	0	0	2	0	0	0	0	0
group_4028	0	0	0	0	0	0	0	20	0	0	0	0	0
group_4031	0	0	0	0	0	0	0	0	0	1	0	0	0
group_4032	0	0	0	0	0	0	0	4	0	0	0	0	0
group_4035	0	0	0	0	0	0	0	1	0	0	0	0	0
group_4041	0	0	0	0	0	0	0	4	0	0	0	0	0
group_4042	0	0	0	0	0	0	0	8	0	0	0	0	0
group_4048	0	0	0	0	0	0	0	0	0	0	1	0	0
group_4055	0	0	0	0	0	0	0	1	0	0	0	0	0
group_4056	0	0	0	1	0	0	0	0	0	0	0	0	0
group_4062	0	0	0	0	0	0	0	1	0	0	0	0	0
group_4066	0	0	0	0	0	0	0	0	0	0	0	5	0
group_4067	0	0	0	0	0	0	0	5	0	0	0	0	0
group_407	0	0	0	0	0	0	0	14	0	0	0	0	0
group_4072	0	0	0	0	0	0	0	1	0	0	0	0	0
group_4086	0	0	0	0	0	0	0	0	0	1	0	0	0
group_4087	0	0	0	0	0	0	0	0	0	1	0	0	0
group_4088	0	0	0	0	0	0	0	0	0	3	0	0	0
group_4092	0	0	0	0	0	0	0	0	0	1	0	0	0
group_4093	0	0	0	0	0	0	0	1	0	0	0	0	0
group_4094	0	0	0	0	0	0	0	0	0	6	0	0	0
group_4104	0	0	0	0	0	0	0	1	0	0	0	0	0
group_4105	0	0	0	0	0	0	0	1	0	0	0	0	0
group_4113	0	0	0	1	0	0	0	0	0	0	0	0	0
group_4114	0	0	0	0	0	0	0	1	0	0	0	0	0
group_4115	0	0	0	0	0	0	0	2	0	0	0	0	0
group_4117	0	0	0	0	0	0	0	1	0	0	0	0	0
group_4123	0	0	0	0	0	0	0	0	0	0	0	3	0
group_4126	0	0	0	0	0	0	0	0	0	1	0	0	0
group_4128	0	0	0	0	0	0	0	2	0	0	0	0	0
group_4129	0	0	0	0	0	0	0	1	0	0	0	0	0
group_4130	0	0	0	0	0	0	0	4	0	0	0	0	0
group_4131	0	0	0	14	0	0	0	0	0	0	0	0	0
group_414	0	0	0	0	0	0	0	4	0	0	0	0	0
group_4140	0	0	0	0	0	0	0	0	0	1	0	0	0
group_415	0	0	0	0	0	0	0	1	0	0	0	0	0
group_4156	0	0	0	0	0	0	1	0	0	0	0	0	0
group_417	0	0	0	0	0	0	0	0	0	2	0	0	0
group_418	0	0	0	0	0	0	0	0	0	1	0	0	0
group_4190	0	0	0	0	0	0	0	2	0	0	0	0	0
group_4195	0	0	0	0	0	0	0	0	0	1	0	0	0
group_4215	0	0	0	0	0	0	1	0	0	0	0	0	0
group_4216	0	0	0	0	0	0	0	0	0	1	0	0	0
group_4229	0	0	0	0	0	0	0	0	0	1	0	0	0
group_4230	0	0	0	0	0	0	0	0	0	1	0	0	0
group_4231	0	0	0	0	0	0	0	2	0	0	0	0	0
group_4232	0	0	0	0	0	0	0	0	0	1	0	0	0
group_4234	0	0	0	0	0	0	0	0	0	1	0	0	0
group_424	0	0	0	0	0	0	0	1	0	0	0	0	0
group_4252	0	0	0	0	0	0	0	1	0	0	0	0	0
group_4254	0	0	0	0	0	0	0	0	0	1	0	0	0
group_4257	0	0	0	0	0	0	0	1	0	0	0	0	0
group_4258	0	0	0	0	0	0	0	2	0	0	0	0	0
group_4265	0	0	0	0	0	0	0	0	0	1	0	0	0
group_4266	0	0	0	0	0	0	0	0	0	1	0	0	0
group_4268	0	0	0	0	0	0	0	0	0	1	0	0	0
group_4272	0	0	0	0	0	0	0	0	0	1	0	0	0
group_4285	0	0	0	0	0	0	0	1	0	0	0	0	0
group_429	0	0	0	1	0	0	0	0	0	0	0	0	0
group_4295	0	0	0	0	0	0	0	0	0	1	0	0	0
group_430	0	0	0	0	0	0	0	0	0	1	0	0	0
group_431	0	0	0	0	0	0	0	0	0	1	0	0	0
group_432	0	0	0	0	0	0	0	7	0	0	0	0	0
group_433	0	0	0	0	0	0	0	2	0	0	0	0	0
group_434	0	0	0	0	0	0	0	2	0	0	0	0	0
group_435	0	0	0	0	0	0	0	1	0	0	0	0	0
group_4351	0	0	0	0	0	0	0	0	0	1	0	0	0
group_4354	0	0	0	0	0	0	0	1	0	0	0	0	0
group_436	0	0	0	0	0	0	0	1	0	0	0	0	0
group_437	0	0	0	0	0	0	0	1	0	0	0	0	0
group_4392	0	0	0	0	0	0	0	1	0	0	0	0	0
group_4393	0	0	0	0	0	0	0	0	0	1	0	0	0
group_4395	0	0	0	0	0	0	0	1	0	0	0	0	0
group_4397	0	0	0	0	0	0	0	1	0	0	0	0	0
group_4411	0	0	0	0	0	0	0	1	0	0	0	0	0
group_4415	0	0	0	0	0	0	0	1	0	0	0	0	0
group_4417	0	0	0	0	0	0	0	21	0	0	0	0	0
group_4423	0	0	0	0	0	0	0	1	0	0	0	0	0
group_4426	0	0	0	0	0	0	0	3	0	0	0	0	0
group_4427	0	0	0	0	0	0	0	4	0	0	0	0	0
group_4429	0	0	0	0	0	0	0	1	0	0	0	0	0
group_4430	0	0	0	0	0	0	0	0	1	0	0	0	0
group_4432	0	0	0	0	0	0	0	1	0	0	0	0	0
group_4433	0	0	0	0	0	0	0	0	0	0	0	2	0
group_4435	0	0	0	0	0	0	0	1	0	0	0	0	0
group_4452	0	0	0	0	0	0	0	0	0	2	0	0	0
group_4457	0	0	0	0	0	0	0	1	0	0	0	0	0
group_4476	0	0	0	0	0	0	0	0	0	1	0	0	0
group_449	0	0	0	0	0	0	0	6	0	0	0	0	0
group_4492	0	0	0	0	0	0	0	0	0	1	0	0	0
group_4499	0	0	0	0	0	0	0	1	0	0	0	0	0
group_451	0	0	0	0	0	0	0	1	0	0	0	0	0
group_4516	0	0	0	0	0	0	0	0	0	1	0	0	0
group_4517	0	0	0	0	0	0	0	1	0	0	0	0	0
group_4528	0	0	0	0	0	0	0	1	0	0	0	0	0
group_4531	0	0	0	0	0	0	0	1	0	0	0	0	0
group_454	0	0	0	0	0	0	0	0	0	1	0	0	0
group_4547	0	0	0	0	0	0	0	1	0	0	0	0	0
group_4586	0	0	0	0	0	0	0	2	0	0	0	0	0
group_4587	0	0	0	0	0	0	0	1	0	0	0	0	0
group_4592	0	0	0	0	0	0	0	1	0	0	0	0	0
group_4599	0	0	0	0	0	0	0	1	0	0	0	0	0
group_46	0	0	0	0	0	0	0	3	0	0	0	0	0
group_460	0	0	0	0	0	0	0	0	0	1	0	0	0
group_4600	0	0	0	0	0	0	0	1	0	0	0	0	0
group_4627	0	0	0	0	0	0	0	1	0	0	0	0	0
group_4628	0	0	0	0	0	0	0	6	0	0	0	0	0
group_464	0	0	0	0	0	0	0	7	0	0	0	0	0
group_4642	0	0	0	0	0	0	0	2	0	0	0	0	0
group_4644	0	0	0	0	0	0	0	0	0	0	2	0	0
group_4646	0	0	0	0	0	0	0	0	1	0	0	0	0
group_4652	0	0	0	0	0	0	0	1	0	0	0	0	0
group_4655	0	0	0	0	0	0	0	1	0	0	0	0	0
group_4665	0	0	0	0	0	0	0	3	0	0	0	0	0
group_4668	0	0	0	0	0	0	0	14	0	0	0	0	0
group_4679	0	0	0	0	0	0	0	2	0	0	0	0	0
group_468	0	0	0	0	0	0	0	0	0	0	1	0	0
group_4680	0	0	0	0	0	0	0	4	0	0	0	0	0
group_4685	0	0	0	0	0	0	0	3	0	0	0	0	0
group_469	0	0	0	0	0	0	0	0	0	0	1	0	0
group_4694	0	0	0	0	0	0	0	4	0	0	0	0	0
group_4697	0	0	0	0	0	0	0	5	0	0	0	0	0
group_4701	0	0	0	0	0	0	0	3	0	0	0	0	0
group_4704	0	0	0	0	0	0	0	3	0	0	0	0	0
group_4714	0	0	0	0	0	0	0	0	0	0	4	0	0
group_472	0	0	0	0	0	0	0	1	0	0	0	0	0
group_4733	0	0	0	0	0	0	0	0	0	1	0	0	0
group_4734	0	0	0	1	0	0	0	0	0	0	0	0	0
group_4738	0	0	0	0	0	0	0	0	0	1	0	0	0
group_4739	0	0	0	0	0	0	0	1	0	0	0	0	0
group_474	0	0	0	0	0	0	0	0	0	1	0	0	0
group_4740	0	0	0	0	0	0	0	0	0	1	0	0	0
group_4741	0	0	0	0	0	0	0	0	0	1	0	0	0
group_4756	0	0	0	0	0	0	0	0	0	0	0	6	0
group_476	0	0	0	0	0	0	0	0	0	1	0	0	0
group_4760	0	0	0	0	0	0	0	11	0	0	0	0	0
group_4762	0	0	0	0	0	0	0	1	0	0	0	0	0
group_4765	0	0	0	0	0	0	0	1	0	0	0	0	0
group_4773	0	0	1	0	0	0	0	0	0	0	0	0	0
group_4783	0	0	0	0	0	0	0	0	0	1	0	0	0
group_4784	0	0	0	0	0	0	0	0	0	1	0	0	0
group_4786	0	0	0	0	0	0	0	1	0	0	0	0	0
group_4788	0	0	0	0	0	0	0	0	0	1	0	0	0
group_479	0	0	0	0	0	0	0	0	0	2	0	0	0
group_4792	0	0	0	0	0	0	0	0	0	1	0	0	0
group_48	0	0	0	1	0	0	0	0	0	0	0	0	0
group_480	0	0	0	0	0	0	0	0	0	1	0	0	0
group_4800	0	0	0	0	0	0	0	0	0	1	0	0	0
group_4801	0	0	0	0	0	0	0	0	0	3	0	0	0
group_4803	0	0	0	0	0	0	0	0	0	3	0	0	0
group_481	0	0	0	0	0	0	0	0	0	1	0	0	0
group_4812	0	0	0	0	0	0	0	0	0	0	0	4	0
group_4820	0	0	0	0	0	0	0	3	0	0	0	0	0
group_4821	0	0	0	0	0	0	0	3	0	0	0	0	0
group_4825	0	0	0	0	0	0	0	1	0	0	0	0	0
group_4827	0	0	0	0	0	0	0	0	0	1	0	0	0
group_4836	0	0	0	0	0	0	0	0	0	0	3	0	0
group_4837	0	0	0	0	0	0	0	0	0	0	2	0	0
group_4838	0	0	0	0	0	0	0	0	0	0	1	0	0
group_4839	0	0	0	0	0	0	0	0	1	0	0	0	0
group_4844	0	0	0	0	0	0	0	0	0	0	0	4	0
group_4846	0	0	0	0	0	0	0	0	0	0	0	6	0
group_4847	0	0	0	0	0	0	0	0	0	0	0	1	0
group_4848	0	0	0	0	0	0	0	0	0	0	0	6	0
group_4850	0	0	0	0	0	0	0	0	0	0	0	3	0
group_4851	0	0	0	0	0	0	0	0	0	0	0	1	0
group_4853	0	0	0	0	0	0	0	1	0	0	0	0	0
group_4857	0	0	0	0	0	0	0	0	0	0	0	3	0
group_4858	0	0	0	0	0	0	0	0	0	0	0	1	0
group_4862	0	0	0	0	0	0	0	6	0	0	0	0	0
group_488	0	0	0	0	0	0	0	0	0	2	0	0	0
group_49	0	0	0	0	0	0	0	1	0	0	0	0	0
group_493	0	0	0	0	0	0	0	5	0	0	0	0	0
group_496	0	0	0	0	0	0	0	1	0	0	0	0	0
group_497	0	0	0	0	0	0	0	1	0	0	0	0	0
group_499	0	0	0	0	0	0	0	1	0	0	0	0	0
group_50	0	0	0	0	0	0	0	3	0	0	0	0	0
group_5008	0	0	0	0	0	0	0	0	0	1	0	0	0
group_5010	0	0	0	0	0	0	0	0	0	1	0	0	0
group_504	0	0	0	0	0	0	0	1	0	0	0	0	0
group_505	0	0	0	0	0	0	0	0	0	0	0	1	0
group_511	0	0	0	0	0	0	0	1	0	0	0	0	0
group_512	0	0	0	0	0	0	0	1	0	0	0	0	0
group_5159	0	0	0	0	0	0	0	0	0	1	0	0	0
group_5181	0	0	0	0	0	0	0	1	0	0	0	0	0
group_5184	0	0	0	0	0	0	0	6	0	0	0	0	0
group_5185	0	0	0	0	0	0	0	1	0	0	0	0	0
group_5187	0	0	0	0	0	0	0	2	0	0	0	0	0
group_5189	0	0	0	0	0	0	0	1	0	0	0	0	0
group_519	0	0	0	0	1	0	0	0	0	0	0	0	0
group_5191	0	0	0	0	0	0	0	1	0	0	0	0	0
group_5212	0	0	0	0	0	0	0	1	0	0	0	0	0
group_5213	0	0	0	1	0	0	0	0	0	0	0	0	0
group_522	0	0	0	0	0	0	0	1	0	0	0	0	0
group_5251	0	0	0	0	0	0	0	1	0	0	0	0	0
group_526	0	0	0	0	0	0	0	1	0	0	0	0	0
group_528	0	0	0	0	0	0	0	0	0	0	0	1	0
group_53	0	0	0	0	0	0	0	1	0	0	0	0	0
group_530	0	0	0	0	0	0	0	2	0	0	0	0	0
group_532	0	0	0	0	0	0	0	7	0	0	0	0	0
group_533	0	0	0	0	0	0	0	0	0	0	1	0	0
group_5349	0	0	0	0	0	0	0	1	0	0	0	0	0
group_5368	0	0	0	0	0	0	0	1	0	0	0	0	0
group_5369	0	0	0	1	0	0	0	0	0	0	0	0	0
group_5371	0	0	0	0	0	0	0	1	0	0	0	0	0
group_5375	0	0	0	0	0	0	0	1	0	0	0	0	0
group_5376	0	0	0	0	0	0	0	1	0	0	0	0	0
group_5386	0	0	0	0	0	0	0	1	0	0	0	0	0
group_5391	0	0	0	0	0	0	0	11	0	0	0	0	0
group_54	0	0	0	0	0	0	0	0	0	1	0	0	0
group_540	0	0	1	0	0	0	0	0	0	0	0	0	0
group_5405	0	0	0	0	0	0	0	1	0	0	0	0	0
group_5406	0	0	0	0	0	0	0	2	0	0	0	0	0
group_5418	0	0	0	0	0	0	0	0	0	0	0	1	0
group_5424	0	0	0	0	0	0	0	2	0	0	0	0	0
group_5426	0	0	0	0	0	0	0	1	0	0	0	0	0
group_5428	0	0	0	0	0	0	0	0	0	0	0	1	0
group_543	0	0	0	0	0	0	0	1	0	0	0	0	0
group_544	0	0	0	0	0	0	0	0	0	2	0	0	0
group_5449	0	0	0	0	0	0	0	3	0	0	0	0	0
group_5451	0	0	0	0	0	0	0	5	0	0	0	0	0
group_5454	0	0	0	0	0	0	0	1	0	0	0	0	0
group_5458	0	0	0	0	0	0	0	4	0	0	0	0	0
group_5462	0	0	0	2	0	0	0	0	0	0	0	0	0
group_5465	0	0	0	0	0	0	0	1	0	0	0	0	0
group_548	0	0	0	0	0	0	0	0	0	1	0	0	0
group_5482	0	0	0	0	0	0	0	3	0	0	0	0	0
group_5484	0	0	0	0	0	0	0	0	1	0	0	0	0
group_5485	0	0	0	0	0	0	0	0	0	0	1	0	0
group_5487	0	0	0	0	0	0	0	2	0	0	0	0	0
group_5488	0	0	0	0	0	0	0	2	0	0	0	0	0
group_5489	0	0	0	0	0	0	0	2	0	0	0	0	0
group_5493	0	0	0	0	0	0	0	8	0	0	0	0	0
group_5496	0	0	0	0	0	0	0	1	0	0	0	0	0
group_5498	0	0	0	0	0	0	0	1	0	0	0	0	0
group_550	0	0	0	0	0	0	0	1	0	0	0	0	0
group_551	0	0	0	0	0	0	0	0	0	0	1	0	0
group_5520	0	0	0	0	0	0	0	2	0	0	0	0	0
group_5521	0	0	0	0	0	0	0	2	0	0	0	0	0
group_5522	0	0	0	0	0	0	0	2	0	0	0	0	0
group_5523	0	0	0	0	0	0	0	2	0	0	0	0	0
group_5524	0	0	0	0	0	0	0	3	0	0	0	0	0
group_5532	0	0	0	0	0	0	0	20	0	0	0	0	0
group_5538	0	0	0	0	0	0	0	2	0	0	0	0	0
group_554	0	0	0	0	0	0	0	1	0	0	0	0	0
group_5540	0	0	0	0	0	0	0	2	0	0	0	0	0
group_5543	0	0	0	0	0	0	0	2	0	0	0	0	0
group_5546	0	0	0	0	0	0	0	3	0	0	0	0	0
group_555	0	0	0	0	0	0	0	1	0	0	0	0	0
group_5554	0	0	0	0	0	0	0	22	0	0	0	0	0
group_5558	0	0	0	0	0	0	0	3	0	0	0	0	0
group_556	0	0	0	0	0	0	0	3	0	0	0	0	0
group_5560	0	0	0	0	0	0	0	2	0	0	0	0	0
group_5561	0	0	0	0	0	0	0	3	0	0	0	0	0
group_5564	0	0	0	0	0	0	0	6	0	0	0	0	0
group_5565	0	0	0	0	0	0	0	0	0	0	0	2	0
group_5569	0	0	0	0	0	0	0	2	0	0	0	0	0
group_5573	0	0	0	0	0	0	0	2	0	0	0	0	0
group_5575	0	0	0	0	0	0	0	4	0	0	0	0	0
group_5578	0	0	0	0	0	0	0	4	0	0	0	0	0
group_5587	0	0	0	0	0	0	0	1	0	0	0	0	0
group_5588	0	0	0	0	0	0	0	1	0	0	0	0	0
group_559	0	0	0	0	0	0	0	2	0	0	0	0	0
group_5595	0	0	0	0	0	0	0	0	0	0	4	0	0
group_560	0	0	0	0	0	0	0	2	0	0	0	0	0
group_5601	0	0	0	0	0	0	0	20	0	0	0	0	0
group_5649	0	0	0	3	0	0	0	0	0	0	0	0	0
group_565	0	0	0	0	0	0	0	4	0	0	0	0	0
group_5653	0	0	0	2	0	0	0	0	0	0	0	0	0
group_5654	0	0	0	2	0	0	0	0	0	0	0	0	0
group_566	0	0	0	0	0	0	0	1	0	0	0	0	0
group_5692	0	0	0	0	0	0	0	0	0	3	0	0	0
group_57	0	0	0	0	0	0	0	1	0	0	0	0	0
group_570	0	0	0	0	0	0	0	1	0	0	0	0	0
group_5700	0	0	0	0	0	0	0	4	0	0	0	0	0
group_5707	0	0	0	0	0	0	0	1	0	0	0	0	0
group_5708	0	0	0	0	0	0	0	0	0	1	0	0	0
group_5709	0	0	0	0	0	0	0	0	0	2	0	0	0
group_571	0	0	0	0	0	0	0	1	0	0	0	0	0
group_5718	0	0	0	0	0	0	0	0	0	7	0	0	0
group_5719	0	0	0	0	0	0	0	0	0	2	0	0	0
group_5738	0	0	0	0	0	0	0	3	0	0	0	0	0
group_574	0	0	0	0	0	0	0	11	0	0	0	0	0
group_5745	0	0	0	0	0	0	0	2	0	0	0	0	0
group_5746	0	0	0	0	0	0	0	2	0	0	0	0	0
group_5747	0	0	0	0	0	0	0	2	0	0	0	0	0
group_5748	0	0	0	0	0	0	0	2	0	0	0	0	0
group_575	0	0	0	0	0	0	0	3	0	0	0	0	0
group_5752	0	0	0	0	0	0	0	29	0	0	0	0	0
group_5753	0	0	0	0	0	0	0	2	0	0	0	0	0
group_5754	0	0	0	0	0	0	0	2	0	0	0	0	0
group_5755	0	0	0	0	0	0	0	2	0	0	0	0	0
group_5756	0	0	0	0	0	0	0	2	0	0	0	0	0
group_5759	0	0	0	0	0	0	0	2	0	0	0	0	0
group_5764	0	0	0	0	0	0	0	1	0	0	0	0	0
group_5765	0	0	0	0	0	0	0	1	0	0	0	0	0
group_5766	0	0	0	0	0	0	0	1	0	0	0	0	0
group_5767	0	0	0	0	0	0	0	1	0	0	0	0	0
group_5769	0	0	0	0	0	0	0	12	0	0	0	0	0
group_577	0	0	0	0	0	0	0	4	0	0	0	0	0
group_5770	0	0	0	0	0	0	0	5	0	0	0	0	0
group_5771	0	0	0	0	0	0	0	4	0	0	0	0	0
group_5773	0	0	0	0	0	0	0	2	0	0	0	0	0
group_5774	0	0	0	0	0	0	0	2	0	0	0	0	0
group_5775	0	0	0	0	0	0	0	5	0	0	0	0	0
group_5776	0	0	0	0	0	0	0	2	0	0	0	0	0
group_5777	0	0	0	0	0	0	0	2	0	0	0	0	0
group_578	0	0	0	0	0	0	0	1	0	0	0	0	0
group_5784	0	0	0	0	0	0	0	10	0	0	0	0	0
group_5790	0	0	0	0	0	0	0	4	0	0	0	0	0
group_5791	0	0	0	0	0	0	0	5	0	0	0	0	0
group_5794	0	0	0	0	0	0	0	13	0	0	0	0	0
group_5796	0	0	0	0	0	0	0	0	0	0	3	0	0
group_5798	0	0	0	0	0	0	0	0	0	0	2	0	0
group_5800	0	0	0	0	0	0	0	0	0	0	1	0	0
group_5801	0	0	0	0	0	0	0	0	0	0	3	0	0
group_5802	0	0	0	0	0	0	0	0	0	0	1	0	0
group_5803	0	0	0	0	0	0	0	0	0	0	1	0	0
group_5804	0	0	0	0	0	0	0	0	0	0	1	0	0
group_5809	0	0	0	0	0	0	0	0	0	0	3	0	0
group_581	0	0	0	0	0	0	0	1	0	0	0	0	0
group_5813	0	0	0	0	0	0	0	0	0	0	2	0	0
group_5819	0	0	0	0	0	0	0	0	0	0	1	0	0
group_5821	0	0	0	0	0	0	0	0	0	0	0	6	0
group_5822	0	0	0	0	0	0	0	0	0	0	0	6	0
group_5825	0	0	0	0	0	0	0	0	0	0	0	6	0
group_5826	0	0	0	0	0	0	0	0	0	0	0	6	0
group_5827	0	0	0	0	0	0	0	0	0	0	0	6	0
group_5828	0	0	0	0	0	0	0	0	0	0	0	6	0
group_5829	0	0	0	0	0	0	0	0	0	0	0	6	0
group_5830	0	0	0	0	0	0	0	0	0	0	0	6	0
group_5831	0	0	0	0	0	0	0	0	0	0	0	5	0
group_5834	0	0	0	0	0	0	0	0	0	0	0	2	0
group_5835	0	0	0	0	0	0	0	0	0	0	0	2	0
[truncated: 3,239 more rows]

## Sheet: Table S3
Table S3 Taxa accosiated with animal ST398 or human ST398.
Taxa	Annotation	Frequency in animal-isolates	Frequency in human-isolates	Ratio	P value in logic regression	P value in independence test
ErmC	Antibiotic resistance gene	0.203822	0.429812	2.10876	1.38965e-11	4.589e-12
parC	Antibiotic resistance gene	0.977707	0.995658	1.01836	0.0170582	0.007903
mecA	Antibiotic resistance gene	0.805732	0.7178	0.890867	0.00318872	0.003038
tetM	Antibiotic resistance gene	0.840764	0.703329	0.836535	4.91831e-06	3.511e-06
tet(K)	Antibiotic resistance gene	0.509554	0.409551	0.803745	0.00315282	0.003095
AAC(6')-Ie-APH(2'')-Ia	Antibiotic resistance gene	0.286624	0.205499	0.716964	0.00484236	0.004692
ErmA	Antibiotic resistance gene	0.0636943	0.0347323	0.545297	0.0404129	0.03764
dfrG	Antibiotic resistance gene	0.194268	0.105644	0.543807	0.000157912	0.0001288
vgaA	Antibiotic resistance gene	0.121019	0.0636758	0.526163	0.00245063	0.002095
spd	Antibiotic resistance gene	0.0605096	0.0303907	0.502247	0.0263349	0.02366
fexA	Antibiotic resistance gene	0.089172	0.0434153	0.486872	0.00472859	0.003956
lnuA	Antibiotic resistance gene	0.0541401	0.0231548	0.427684	0.0130666	0.01066
ErmB	Antibiotic resistance gene	0.146497	0.0535456	0.365507	1.79856e-06	7.074e-07
lsaE	Antibiotic resistance gene	0.152866	0.0361795	0.236674	1.01317e-09	4.037e-11
vgaALC	Antibiotic resistance gene	0.0636943	0.0144718	0.227207	9.78788e-05	2.158e-05
ISSau8	Insertion sequence	0.589172	0.377713	0.641092	6.14215e-10	4.088e-10
IS256	Insertion sequence	0.264331	0.162084	0.613185	0.000165751	0.0001463
IS1182	Insertion sequence	0.0350318	0.0115774	0.330483	0.0160368	0.01143
IS257R2	Insertion sequence	0.0350318	0.0101302	0.289172	0.00952533	0.005826
ISSau6	Insertion sequence	0.0159236	0.00289436	0.181766	0.0406787	0.0214
IS431R	Insertion sequence	0.044586	0.00578871	0.129833	0.000268381	1.738e-05
ISSau4	Insertion sequence	0.0286624	0.00289436	0.100981	0.00312599	0.0002757
Staphy_Mu50	Phage	0.140127	0.254703	1.81766	5.99579e-05	4.716e-05
StauST398_2	Phage	0.0509554	0.00144718	0.0284009	0.000471438	1.718e-08
rep19	Plasmid	0.00636943	0.0795948	12.4964	0.000317972	3.33e-06
rep16	Plasmid	0.0191083	0.136035	7.11915	9.81194e-07	9.656e-09
rep5a	Plasmid	0.0191083	0.13314	6.96768	1.33711e-06	1.65e-08
rep10	Plasmid	0.159236	0.422576	2.65378	4.47026e-15	2.22e-16
rep7a	Plasmid	0.550955	0.439942	0.798508	0.00112616	0.001095
rep22	Plasmid	0.0764331	0.0390738	0.511216	0.0140152	0.01243
sak	Virulence gene	0.0414013	0.183792	4.43927	3.61933e-08	1.549e-09
scn	Virulence gene	0.121019	0.295224	2.43949	6.9232e-09	2.183e-09
chp	Virulence gene	0.117834	0.227207	1.92819	6.30214e-05	4.706e-05
sdrD	Virulence gene	0.732484	0.82055	1.12023	0.00149621	0.001411
coa	Virulence gene	0.917197	0.972504	1.0603	0.00017973	5.88e-06
sbi	Virulence gene	0.964968	0.995658	1.0318	0.00121327	0.0001202
hld	Virulence gene	0.971338	0.995658	1.02504	0.00433102	0.001008
cna	Virulence gene	0.971338	0.995658	1.02504	0.00433102	0.001008
fnbA	Virulence gene	0.974522	0.994211	1.0202	0.014798	0.007765
sdrE	Virulence gene	0.952229	0.848046	0.89059	7.95654e-06	2.376e-06
fnbB	Virulence gene	0.869427	0.639653	0.735718	9.67457e-13	9.501e-14
sdrC	Virulence gene	0.61465	0.42547	0.692216	3.51957e-08	2.71e-08
clfA	Virulence gene	0.0159236	0.00289436	0.181766	0.0406787	0.0214
ST398_22	Subtype	0.00318471	0.0390738	12.2692	0.0126454	0.001362
ST398_8	Subtype	0.0191083	0.0665702	3.48384	0.00315253	0.001651
ST398_10	Subtype	0.0318471	0.081042	2.54472	0.00487645	0.003538
ST398_23	Subtype	0.117834	0.0593343	0.50354	0.00160662	0.001323
ST398_15	Subtype	0.0414013	0.0173661	0.419459	0.0278471	0.02343
ST398_16	Subtype	0.0573248	0.0188133	0.328188	0.00184208	0.001071
ST398_24	Subtype	0.121019	0.024602	0.20329	1.60802e-08	4.797e-10
ST398_12	Subtype	0.0509554	0.0101302	0.198806	0.000299708	6.087e-05

## Sheet: Table S4
Table S4 The distribution of SCCmec types, mecA and PVL.
Isolate	I	II	III	IV	V	VI	VII	VIII	IX	mecA	lukS-PV	lukF-PV	Year	Country	Host species	Subtype
01-00379-RMS15-Resp_S6_L001_R1_001	0	0	0	1	0	0	0	0	0	1	0	0	2018	The Netherlands	Human	ST398_26
01-00379-RMS18-BL_S7_L001_R1_001	0	0	0	1	0	0	0	0	0	1	0	0	2018	The Netherlands	Human	ST398_26
01-00379-SCR-NS_S3_L001_R1_001	0	0	0	1	0	0	0	0	0	1	0	0	2018	The Netherlands	Human	ST398_26
01-00379-SCR-TS_S4_L001_R1_001	0	0	0	1	0	0	0	0	0	1	0	0	2018	The Netherlands	Human	ST398_26
01-00379-SSI2-Other-S1_S6_L001_R1_001	0	0	0	1	0	0	0	0	0	1	0	0	2018	The Netherlands	Human	ST398_26
01-00379-SSI2-WI-S5_S5_L001_R1_001	0	0	0	1	0	0	0	0	0	1	0	0	2018	The Netherlands	Human	ST398_26
01-00440-SSI2-WI-S1_S12_L001_R1_001	0	0	0	0	0	0	0	0	0	0	0	0	2019	The Netherlands	Human	ST398_21
01-4381-SCR-NS_S11_L001_R1_001	0	0	0	0	0	0	0	0	0	0	0	0	2017	The Netherlands	Human	ST398_10
01-5071-SCR-NS_S15_L001_R1_001	0	0	0	0	0	0	0	0	0	0	0	0	2018	The Netherlands	Human	ST398_10
01-5821-SCR-NS_S14_L001_R1_001	0	0	0	0	0	0	0	0	0	0	0	0	2018	The Netherlands	Human	ST398_10
02-00379_SSI_WI_S4_S3_L001_R1_001	0	0	0	0	0	0	0	0	0	0	0	0	2018	The Netherlands	Human	ST398_10
02-00379_SSI1_WI_S1_S4_L001_R1_001	0	0	0	0	0	0	0	0	0	0	0	0	2018	The Netherlands	Human	ST398_10
02-00379_SSI1_WI_S2_S2_L001_R1_001	0	0	0	0	0	0	0	0	0	0	0	0	2018	The Netherlands	Human	ST398_10
02-00379-SSI1-WI-S3_S5_L001_R1_001	0	0	0	0	0	0	0	0	0	0	0	0	2018	The Netherlands	Human	ST398_10
02-0062-D1pi1-ETA-SA_S3_L001_R1_001	0	0	0	0	0	0	0	0	0	0	0	0	2016	Spain	Human	ST398_9
02-00944-SCR-NS_S5_L001_R1_001	0	0	0	0	0	0	0	0	0	0	0	0	2018	The Netherlands	Human	ST398_10
02-00944-SCR-TS_S6_L001_R1_001	0	0	0	0	0	0	0	0	0	0	0	0	2018	The Netherlands	Human	ST398_10
02-01073-SCR-NS_S10_L001_R1_001	0	0	0	0	0	0	0	0	0	0	0	0	2019	The Netherlands	Human	ST398_10
02-0752screening_S16_L001_R1_001	0	0	0	0	0	0	0	0	0	0	0	0	2016	Spain	Human	ST398_10
05-0515-D1-type1_S9_L001_R1_001	0	0	0	0	0	0	0	0	0	0	0	0	2016	Serbia	Human	ST398_25
05-0515-D1-type2_S10_L001_R1_001	0	0	0	0	0	0	0	0	0	0	0	0	2016	Serbia	Human	ST398_25
05-0515screening-ETA_S5_L001_R1_001	0	0	0	0	0	0	0	0	0	0	0	0	2016	Serbia	Human	ST398_25
05-0515screening-NS_S6_L001_R1_001	0	0	0	0	0	0	0	0	0	0	0	0	2016	Serbia	Human	ST398_25
05-3665-screening-NS_S2_L001_R1_001	0	0	0	0	1	0	1	0	0	1	0	0	2017	Serbia	Human	ST398_15
09-1089-SCR-NS_S3_L001_R1_001	0	0	0	0	0	0	0	0	0	0	0	0	2017	Turkey	Human	ST398_10
10-0280-SCR-NS_S7_L001_R1_001	0	0	0	0	0	0	0	0	0	0	0	0	2017	Estonia	Human	ST398_21
10-0490-SCR-NS_S9_L001_R1_001	0	0	0	0	0	0	0	0	0	0	0	0	2017	Estonia	Human	ST398_21
10-0820-SCR-NS_S11_L001_R1_001	0	0	0	0	0	0	0	0	0	0	0	0	2017	Estonia	Human	ST398_10
10-4510-W3S1-spu-SA_S5_L001_R1_001	0	0	0	0	0	0	0	0	0	0	0	0	2018	Estonia	Human	ST398_21
11-00282-SCR-NS_S2_L001_R1_001	0	0	0	0	0	0	0	0	0	0	0	0	2018	France	Human	ST398_9
11-00282-SSI-WI-S1_S3_L001_R1_001	0	0	0	0	0	0	0	0	0	0	0	0	2018	France	Human	ST398_9
11-00282-SSI-WI-S2_S4_L001_R1_001	0	0	0	0	0	0	0	0	0	0	0	0	2018	France	Human	ST398_9
11-00307-SCR-NS_S5_L001_R1_001	0	0	0	0	0	0	0	0	0	0	0	0	2018	France	Human	ST398_9
11-00307-SSI-WI-S1_S1_L001_R1_001	0	0	0	0	0	0	0	0	0	0	0	0	2018	France	Human	ST398_9
11-00307-SSI-WI-S2_S6_L001_R1_001	0	0	0	0	0	0	0	0	0	0	0	0	2018	France	Human	ST398_9
11-00307-SSI-WI-S3_S9_L001_R1_001	0	0	0	0	0	0	0	0	0	0	0	0	2018	France	Human	ST398_9
11-00307-SSI-WI-S4_S7_L001_R1_001	0	0	0	0	0	0	0	0	0	0	0	0	2018	France	Human	ST398_9
11-00307-SSI-WI-S5_S8_L001_R1_001	0	0	0	0	0	0	0	0	0	0	0	0	2018	France	Human	ST398_9
11-00529-RMS-Urine_S2_L001_R1_001	0	0	0	0	0	0	0	0	0	0	0	0	2019	France	Human	ST398_10
11-00529-SCR-NS_S8_L001_R1_001	0	0	0	0	0	0	0	0	0	0	0	0	2018	France	Human	ST398_10
11-00529-SCR-PS_S10_L001_R1_001	0	0	0	0	0	0	0	0	0	0	0	0	2018	France	Human	ST398_10
11-00529-SCR-TS_S9_L001_R1_001	0	0	0	0	0	0	0	0	0	0	0	0	2018	France	Human	ST398_10
11-00750-SCR-NS_S7_L001_R1_001	0	0	0	0	0	0	0	0	0	0	0	0	2019	France	Human	ST398_9
11-0101-Day-1-sputum-SA_S5_L001_R1_001	0	0	0	0	0	0	0	0	0	0	0	0	2017	France	Human	ST398_10
11-0101-screening-ETA_S9_L001_R1_001	0	0	0	0	0	0	0	0	0	0	0	0	2017	France	Human	ST398_10
1548_S16_L001_R1_001	0	0	0	0	1	0	1	0	0	1	0	0	2009	The Netherlands	Cattle	ST398_8
16-0376-D1-resp_S1_L001_R1_001	0	0	0	0	0	0	0	0	0	0	0	0	2017	Bulgaria	Human	ST398_10
16-1006-Screening-NS_S14_L001_R1_001	0	0	0	0	0	0	0	0	0	0	0	0	2017	Bulgaria	Human	ST398_10
17-0017-SCR-NS_S5_L001_R1_001	0	0	0	0	0	0	0	0	0	0	0	0	2017	France	Human	ST398_10
18-0978-SCR-NS_S2_L001_R1_001	0	0	0	0	0	0	0	0	0	0	0	0	2018	Germany	Human	ST398_10
20005580002d1SA_S4_L001_R1_001	0	0	0	0	0	0	0	0	0	0	0	0	2015	France	Human	ST398_9
20005580005D2SSBI1SA_S12_L001_R1_001	0	0	0	0	0	0	0	0	0	0	0	0	2015	France	Human	ST398_10
20005580005D3SSBI1SA_S9_L001_R1_001	0	0	0	0	0	0	0	0	0	0	0	0	2015	France	Human	ST398_10
20005580005scSA_S101_L001_R1_001	0	0	0	0	0	0	0	0	0	0	0	0	2015	France	Human	ST398_10
20005600016d1SA_S16_L001_R1_001	0	0	0	0	0	0	0	0	0	0	0	0	2015	France	Human	ST398_10
20005600016d1SSBI1SA_S17_L001_R1_001	0	0	0	0	0	0	0	0	0	0	0	0	2015	France	Human	ST398_10
20005600016d3SSBI-1SA_S18_L001_R1_001	0	0	0	0	0	0	0	0	0	0	0	0	2015	France	Human	ST398_10
20005600023d1SA_S26_L001_R1_001	0	0	0	0	0	0	0	0	0	0	0	0	2015	France	Human	ST398_10
20005600024d1SA_S28_L001_R1_001	0	0	0	0	0	0	0	0	0	0	0	0	2015	France	Human	ST398_9
20005600024d1SSBI1SA_S27_L001_R1_001	0	0	0	0	0	0	0	0	0	0	0	0	2015	France	Human	ST398_9
20005600024d4SSBI1SA_S29_L001_R1_001	0	0	0	0	0	0	0	0	0	0	0	0	2015	France	Human	ST398_9
20005600038d1SA_S32_L001_R1_001	0	0	0	0	0	0	0	0	0	0	0	0	2015	France	Human	ST398_9
20005600045d1SA_S37_L001_R1_001	0	0	0	0	0	0	0	0	0	0	0	0	2016	France	Human	ST398_10
20005600063scSA_S47_L001_R1_001	0	0	0	0	0	0	0	0	0	0	0	0	2016	France	Human	ST398_10
20005600069scSA_S51_L001_R1_001	0	0	0	0	0	0	0	0	0	0	0	0	2016	France	Human	ST398_10
20005600087d1SSBI1SA_S87_L001_R1_001	0	0	0	0	0	0	0	0	0	0	0	0	2016	France	Human	ST398_9
20005600087d6SSBI1SA_S85_L001_R1_001	0	0	0	0	0	0	0	0	0	0	0	0	2016	France	Human	ST398_9
20005600087ScSA_S86_L001_R1_001	0	0	0	0	0	0	0	0	0	0	0	0	2016	France	Human	ST398_9
20005600088ScSA_S88_L001_R1_001	0	0	0	0	0	0	0	0	0	0	0	0	2016	France	Human	ST398_9
20005600141D6SSBI1PF2SA_S16_L001_R1_001	0	0	0	0	0	0	0	0	0	0	0	0	2017	France	Human	ST398_9
20005600141Day1SSBI1BL1SA_S24_R1_001	0	0	0	0	0	0	0	0	0	0	0	0	2017	France	Human	ST398_9
20005600141Day1SSBI1SA_S23_R1_001	0	0	0	0	0	0	0	0	0	0	0	0	2017	France	Human	ST398_9
20005600141Day4SSBI1SA_S25_R1_001	0	0	0	0	0	0	0	0	0	0	0	0	2017	France	Human	ST398_9
20005600141ScreeningSA_S26_R1_001	0	0	0	0	0	0	0	0	0	0	0	0	2017	France	Human	ST398_9
20005600154scSA_S1_L001_R1_001	0	0	0	0	0	0	0	0	0	0	0	0	2017	France	Human	ST398_10
20005670023ScreeningSA_S28_R1_001	0	0	0	0	0	0	0	0	0	0	0	0	2017	France	Human	ST398_9
20005730002d1SA_S58_L001_R1_001	0	0	0	0	0	0	0	0	0	0	0	0	2014	Belgium	Human	ST398_10
20005730006d1SA_S60_L001_R1_001	0	0	0	0	0	0	0	0	0	0	0	0	2015	Belgium	Human	ST398_10
20005740006ScSA_S104_L001_R1_001	0	0	0	0	0	0	0	0	0	0	0	0	2016	Belgium	Human	ST398_9
20006970007ScSA_S112_L001_R1_001	0	0	0	0	0	0	0	0	0	0	0	0	2016	Spain	Human	ST398_9
20007430008D1SA_S71_L001_R1_001	0	0	0	0	0	0	0	0	0	0	0	0	2017	Switzerland	Human	ST398_9
20007430008D1SSBI1SA_S70_L001_R1_001	0	0	0	0	0	0	0	0	0	0	0	0	2017	Switzerland	Human	ST398_9
20007430008D2SSBI1SA_S69_L001_R1_001	0	0	0	0	0	0	0	0	0	0	0	0	2017	Switzerland	Human	ST398_9
20007430011D2SSBI1BL1SA_S75_L001_R1_001	0	0	0	0	0	0	0	0	0	0	0	0	2017	Switzerland	Human	ST398_9
20007430011ResSSBI1SA_S77_L001_R1_001	0	0	0	0	0	0	0	0	0	0	0	0	2017	Switzerland	Human	ST398_9
21-00482-SCR-NS_S3_L001_R1_001	0	0	0	0	0	0	0	0	0	0	0	0	2019	UK	Human	ST398_10
21-00482-SCR-TS_S4_L001_R1_001	0	0	0	0	0	0	0	0	0	0	0	0	2019	UK	Human	ST398_10
21-00482-SSI1-WI-S1_S5_L001_R1_001	0	0	0	0	0	0	0	0	0	0	0	0	2019	UK	Human	ST398_10
23-00079-SCR-NS_S7_L001_R1_001	0	0	0	0	0	0	0	0	0	0	0	0	2019	UK	Human	ST398_9
23-4613-Screening-NS_S9_L001_R1_001	0	0	0	0	0	0	0	0	0	0	0	0	2018	Czech Republic	Human	ST398_21
25-00062-SCR-NS_S12_L001_R1_001	0	0	0	0	0	0	0	0	0	0	0	0	2018	UK	Human	ST398_10
26-00251-SCR-PS_S5_L001_R1_001	0	0	0	0	0	0	0	0	0	0	0	0	2019	UK	Human	ST398_9
26-0356-SCR-NS_S3_L001_R1_001	0	0	0	0	0	0	0	0	0	0	0	0	2017	UK	Human	ST398_10
29-0209-SCR-NS_S14_L001_R1_001	0	0	0	0	0	0	0	0	0	0	0	0	2017	Hungary	Human	ST398_21
31-01731-SCR-TS_S11_L001_R1_001	0	0	0	0	0	0	0	0	0	0	0	0	2019	Serbia	Human	ST398_21
32-00299-SSI-OtherS1_S16_L001_R1_001	0	0	0	0	0	0	0	0	0	0	0	0	2018	Serbia	Human	ST398_21
41-00007-SCR-TS_S14_L001_R1_001	0	0	0	0	0	0	0	0	0	0	0	0	2017	Spain	Human	ST398_9
41-00528-SCR-NS_S8_L001_R1_001	0	0	0	0	0	0	0	0	0	0	0	0	2019	Spain	Human	ST398_10
41-00528-SCR-TS_S8_L001_R1_001	0	0	0	0	0	0	0	0	0	0	0	0	2019	Spain	Human	ST398_10
44-00240-SCR-NS_S13_L001_R1_001	0	0	0	0	0	0	0	0	0	0	0	0	2018	Spain	Human	ST398_9
45-00035-SCR-NS_S12_L001_R1_001	0	0	0	0	0	0	0	0	0	0	0	0	2018	Spain	Human	ST398_10
45-00035-SCR-PS_S13_L001_R1_001	0	0	0	0	0	0	0	0	0	0	0	0	2018	Spain	Human	ST398_10
45-00084-SCR-NS_S14_L001_R1_001	0	0	0	0	0	0	0	0	0	0	0	0	2018	Spain	Human	ST398_10
45-00143-SCR-NS_S15_L001_R1_001	0	0	0	0	0	0	0	0	0	0	0	0	2018	Spain	Human	ST398_10
52-00039-SCR-NS_S15_L001_R1_001	0	0	0	0	0	0	0	0	0	0	0	0	2017	Italy	Human	ST398_10
52-6172-SCR-NS_S3_L001_R1_001	0	0	0	0	0	0	0	0	0	0	0	0	2018	Czech Republic	Human	ST398_10
5k42-7_S14_L001_R1_001	0	0	0	0	1	0	1	0	0	1	0	0	2009	The Netherlands	Poultry	ST398_8
62-00157-SCR-TS_S2_L001_R1_001	0	0	0	0	0	0	0	0	0	0	0	0	2018	Estonia	Human	ST398_21
62-00356-SCR-NS_S6_L001_R1_001	0	0	0	0	0	0	0	0	0	0	0	0	2019	Estonia	Human	ST398_21
7p5_S15_L001_R1_001	0	0	0	0	1	0	1	0	0	1	0	0	2007	The Netherlands	Pig	ST398_8
81-00016-SCR-NS_S2_L001_R1_001	0	0	0	0	0	0	0	0	0	0	0	0	2018	Czech Republic	Human	ST398_10
81-00231-RMS3-Other_S14_L001_R1_001	0	0	0	0	0	0	0	0	0	0	0	0	2019	Czech Republic	Human	ST398_10
81-00231-SCR-TS_S15_L001_R1_001	0	0	0	0	0	0	0	0	0	0	0	0	2019	Czech Republic	Human	ST398_10
83-00048-SCR-NS_S10_L001_R1_001	0	0	0	0	0	0	0	0	0	0	0	0	2019	Czech Republic	Human	ST398_10
83-00048-SCR-TS_S11_L001_R1_001	0	0	0	0	0	0	0	0	0	0	0	0	2019	Czech Republic	Human	ST398_10
83-00048-SSI-WI_S12_L001_R1_001	0	0	0	0	0	0	0	0	0	0	0	0	2019	Czech Republic	Human	ST398_10
91-00001-SCR-NS_S1_L001_R1_001	0	0	0	0	0	0	0	0	0	0	0	0	2018	Belgium	Human	ST398_10
91-00047-SCR-NS_S6_L001_R1_001	0	0	0	0	0	0	0	0	0	0	0	0	2019	Belgium	Human	ST398_10
92-00019-SCR-NS_S14_L001_R1_001	0	0	0	0	1	0	1	0	0	1	0	0	2018	Belgium	Human	ST398_24
92-00126-SCR-NS_S4_L001_R1_001	0	0	0	0	0	0	0	0	0	0	0	0	2019	Belgium	Human	ST398_10
GCA_000252405.2	0	0	0	0	0	0	0	0	0	0	1	1	2007	Dominica	Human	ST398_10
GCA_000258685.1	0	0	0	0	0	0	0	0	0	0	0	0	2004	USA	Human	ST398_10
GCA_001455955.1	0	0	0	0	1	0	1	0	0	1	0	0	2012	Brazil	Pig	ST398_17
GCA_001726145.1	0	0	0	0	1	0	1	0	0	1	0	0	2010	Brazil	Human	ST398_15
GCA_001887075.1	0	0	0	0	1	0	1	0	0	1	0	0	2013	Canada	Poultry	ST398_20
GCA_001940425.1	0	0	0	0	1	0	1	0	0	1	0	0	2007	Denmark	Human	ST398_17
GCA_002025125.1	0	0	0	0	1	0	1	0	0	1	0	0	2012	Germany	Pig	ST398_25
GCA_002089035.2	0	0	0	0	0	0	0	0	0	0	0	0	2014	Canada	Human	ST398_10
GCA_002204575.1	0	0	0	0	1	0	1	0	0	1	0	0	2010	USA	Pig	ST398_20
GCA_003111745.1	0	0	0	0	1	0	1	0	0	1	0	0	2015	Australia	Pig	ST398_20
GCA_008462245.1	0	0	0	0	0	0	0	0	0	0	0	0	2014	China	Human	ST398_18
GCA_008763395.1	0	0	0	0	1	0	1	0	0	1	0	0	2015	Australia	Human	ST398_20
GCA_008763405.1	0	0	0	0	1	0	1	0	0	1	0	0	2015	Australia	Human	ST398_25
GCA_008763455.1	0	0	0	0	1	0	1	0	0	1	0	0	2015	Australia	Human	ST398_25
GCA_008763465.1	0	0	0	0	1	0	1	0	0	1	0	0	2015	Australia	Human	ST398_20
GCA_008763485.1	0	0	0	0	1	0	1	0	0	1	0	0	2015	Australia	Human	ST398_25
GCA_008763505.1	0	0	0	0	1	0	1	0	0	1	0	0	2015	Australia	Human	ST398_20
GCA_008763525.1	0	0	0	0	1	0	1	0	0	1	0	0	2015	Australia	Human	ST398_20
GCA_008763535.1	0	0	0	0	0	0	0	0	0	0	0	0	2015	Australia	Human	ST398_20
GCA_008763565.1	0	0	0	0	0	0	0	0	0	0	0	0	2015	Australia	Human	ST398_20
GCA_008763575.1	0	0	0	0	1	0	1	0	0	1	0	0	2015	Australia	Human	ST398_25
GCA_008763615.1	0	0	0	0	1	0	1	0	0	1	0	0	2015	Australia	Human	ST398_20
GCA_008763625.1	0	0	0	0	1	0	1	0	0	1	0	0	2015	Australia	Human	ST398_20
GCA_008763655.1	0	0	0	0	1	0	1	0	0	1	0	0	2015	Australia	Human	ST398_25
GCA_008763665.1	0	0	0	0	0	0	0	0	0	1	0	0	2015	Australia	Human	ST398_25
GCA_008763675.1	0	0	0	0	1	0	1	0	0	1	0	0	2015	Australia	Human	ST398_25
GCA_008763715.1	0	0	0	0	1	0	1	0	0	1	0	0	2015	Australia	Human	ST398_20
GCA_008763725.1	0	0	0	0	1	0	1	0	0	1	0	0	2015	Australia	Human	ST398_20
GCA_008763735.1	0	0	0	0	1	0	1	0	0	1	0	0	2015	Australia	Human	ST398_25
GCA_008763755.1	0	0	0	0	1	0	1	0	0	1	0	0	2015	Australia	Human	ST398_20
GCA_008763785.1	0	0	0	0	1	0	1	0	0	1	0	0	2015	Australia	Human	ST398_20
GCA_008763805.1	0	0	0	0	1	0	1	0	0	1	0	0	2015	Australia	Human	ST398_25
GCA_008763815.1	0	0	0	0	1	0	1	0	0	1	0	0	2015	Australia	Human	ST398_25
GCA_008763835.1	0	0	0	0	1	0	1	0	0	1	0	0	2015	Australia	Human	ST398_25
GCA_008763845.1	0	0	0	0	1	0	1	0	0	1	0	0	2015	Australia	Human	ST398_20
GCA_010994155.1	0	0	0	0	0	0	0	0	0	1	0	0	2018	China	Cattle	ST398_3
GCA_010994215.1	0	0	0	0	0	0	0	0	0	1	0	0	2018	China	Cattle	ST398_3
GCA_015767495.1	0	0	0	0	1	0	1	0	0	1	0	0	2016	China	Pig	ST398_12
GCA_018682265.1	0	0	0	0	0	0	0	0	0	1	0	0	2018	China	Pig	ST398_12
GCA_019264465.1	0	0	0	0	0	0	0	0	0	0	0	0	2018	China	Cattle	ST398_21
GCA_020003145.1	0	0	0	1	1	0	1	0	0	1	0	0	2021	The Netherlands	Human	ST398_26
GCA_020003165.1	0	0	0	1	1	0	1	0	0	1	0	0	2021	The Netherlands	Human	ST398_26
RWW147_S13_L001_R1_001	0	0	0	1	0	0	0	0	0	1	0	0	2000	China	Human	ST398_18
SRR10102395_L001_R1_001	0	0	0	0	1	0	1	0	0	1	0	0	2014	Slovenia	Human	ST398_25
SRR10102396_L001_R1_001	0	0	0	0	1	0	1	0	0	1	0	0	2014	Slovenia	Human	ST398_12
SRR10102397_L001_R1_001	0	0	0	0	1	0	1	0	0	1	0	0	2014	Slovenia	Cat	ST398_25
SRR10102398_L001_R1_001	0	0	0	0	1	0	1	0	0	1	0	0	2014	Slovenia	Pig	ST398_25
SRR10102399_L001_R1_001	0	0	0	0	1	0	1	0	0	1	0	0	2014	Slovenia	Pig	ST398_25
SRR10102400_L001_R1_001	0	0	0	0	1	0	1	0	0	1	0	0	2016	Slovenia	Human	ST398_23
SRR10102401_L001_R1_001	0	0	0	0	1	0	1	0	0	1	0	0	2016	Slovenia	Human	ST398_23
SRR10102402_L001_R1_001	0	0	0	0	1	0	1	0	0	1	0	0	2016	Slovenia	Human	ST398_23
SRR10102403_L001_R1_001	0	0	0	0	1	0	1	0	0	1	0	0	2016	Slovenia	Human	ST398_23
SRR10102404_L001_R1_001	0	0	0	0	1	0	1	0	0	1	0	0	2015	Slovenia	Human	ST398_23
SRR10102405_L001_R1_001	0	0	0	0	1	0	1	0	0	1	0	0	2015	Slovenia	Human	ST398_25
SRR10102407_L001_R1_001	0	0	0	0	1	0	1	0	0	1	0	0	2014	Slovenia	Human	ST398_23
SRR10102409_L001_R1_001	0	0	0	0	1	0	1	0	0	1	0	0	2014	Slovenia	Pig	ST398_25
SRR10102410_L001_R1_001	0	0	0	0	1	0	1	0	0	1	0	0	2014	Slovenia	Human	ST398_23
SRR10102411_L001_R1_001	0	0	0	0	1	0	1	0	0	1	0	0	2014	Slovenia	Human	ST398_23
SRR10102412_L001_R1_001	0	0	0	0	1	0	1	0	0	1	0	0	2014	Slovenia	Human	ST398_12
SRR10102414_L001_R1_001	0	0	0	0	1	0	1	0	0	1	0	0	2014	Slovenia	Human	ST398_13
SRR10102415_L001_R1_001	0	0	0	0	1	0	1	0	0	1	0	0	2016	Slovenia	Human	ST398_23
SRR10102416_L001_R1_001	0	0	0	0	1	0	1	0	0	1	0	0	2016	Slovenia	Human	ST398_23
SRR10102417_L001_R1_001	0	0	0	0	1	0	1	0	0	1	0	0	2016	Slovenia	Pig	ST398_23
SRR10102418_L001_R1_001	0	0	0	0	1	0	1	0	0	1	0	0	2013	Slovenia	Human	ST398_23
SRR10102419_L001_R1_001	0	0	0	0	1	0	1	0	0	1	0	0	2016	Slovenia	Human	ST398_15
SRR10102420_L001_R1_001	0	0	0	0	1	0	1	0	0	1	0	0	2014	Slovenia	Pig	ST398_25
SRR10102421_L001_R1_001	0	0	0	0	1	0	1	0	0	1	0	0	2016	Slovenia	Barn dust	ST398_15
SRR10102422_L001_R1_001	0	0	0	0	1	0	1	0	0	1	0	0	2015	Slovenia	Human	ST398_15
SRR10102423_L001_R1_001	0	0	0	0	1	0	1	0	0	1	0	0	2016	Slovenia	Human	ST398_25
SRR10102424_L001_R1_001	0	0	0	0	1	0	1	0	0	1	0	0	2016	Slovenia	Barn dust	ST398_23
SRR10102425_L001_R1_001	0	0	0	0	1	0	1	0	0	1	0	0	2016	Slovenia	Barn dust	ST398_25
SRR10102426_L001_R1_001	0	0	0	0	1	0	1	0	0	1	0	0	2015	Slovenia	Human	ST398_23
SRR10102427_L001_R1_001	0	0	0	0	1	0	1	0	0	1	0	0	2015	Slovenia	Human	ST398_23
SRR10102428_L001_R1_001	0	0	0	0	1	0	1	0	0	1	0	0	2015	Slovenia	Human	ST398_23
SRR10102429_L001_R1_001	0	0	0	0	1	0	1	0	0	1	0	0	2015	Slovenia	Barn dust	ST398_23
SRR10102430_L001_R1_001	0	0	0	0	1	0	1	0	0	1	0	0	2015	Slovenia	Sheep	ST398_23
SRR10102431_L001_R1_001	0	0	0	0	1	0	1	0	0	1	0	0	2014	Slovenia	Pig	ST398_25
SRR10102432_L001_R1_001	0	0	0	0	1	0	1	0	0	1	0	0	2015	Slovenia	Pig	ST398_23
SRR10102433_L001_R1_001	0	0	0	0	1	0	1	0	0	1	0	0	2015	Slovenia	Pig	ST398_23
SRR10102434_L001_R1_001	0	0	0	0	1	0	1	0	0	1	0	0	2015	Slovenia	Pig	ST398_23
SRR10102435_L001_R1_001	0	0	0	0	1	0	1	0	0	1	0	0	2015	Slovenia	Pig	ST398_23
SRR10102436_L001_R1_001	0	0	0	0	1	0	1	0	0	1	0	0	2015	Slovenia	Pig	ST398_23
SRR10102437_L001_R1_001	0	0	0	0	1	0	1	0	0	1	0	0	2015	Slovenia	Pig	ST398_23
SRR10102438_L001_R1_001	0	0	0	0	1	0	1	0	0	1	0	0	2015	Slovenia	Pig	ST398_23
SRR10102439_L001_R1_001	0	0	0	0	1	0	1	0	0	1	0	0	2015	Slovenia	Pig	ST398_23
SRR10102440_L001_R1_001	0	0	0	0	1	0	1	0	0	1	0	0	2015	Slovenia	Pig	ST398_23
SRR10102441_L001_R1_001	0	0	0	0	1	0	1	0	0	1	0	0	2014	Slovenia	Human	ST398_23
SRR10102442_L001_R1_001	0	0	0	0	1	0	1	0	0	1	0	0	2014	Slovenia	Pig	ST398_25
SRR10102443_L001_R1_001	0	0	0	0	1	0	1	0	0	1	0	0	2014	Slovenia	Human	ST398_12
SRR11109837_L001_R1_001	0	0	0	0	1	0	1	0	0	1	0	0	2018	Italy	Pig	ST398_24
SRR11109838_L001_R1_001	0	0	0	0	1	0	1	0	0	1	0	0	2018	Italy	Pig	ST398_24
SRR11109839_L001_R1_001	0	0	0	0	1	0	1	0	0	1	0	0	2018	Italy	Pig	ST398_24
SRR11109840_L001_R1_001	0	0	0	0	1	0	1	0	0	1	0	0	2018	Italy	Pig	ST398_24
SRR11109841_L001_R1_001	0	0	0	0	1	0	1	0	0	1	0	0	2018	Italy	Pig	ST398_15
SRR11109842_L001_R1_001	0	0	0	0	1	0	1	0	0	1	0	0	2018	Italy	Human	ST398_15
SRR11109843_L001_R1_001	0	0	0	0	1	0	1	0	0	1	0	0	2018	Italy	Human	ST398_15
SRR11109844_L001_R1_001	0	0	0	0	1	0	1	0	0	1	0	0	2018	Italy	Pig	ST398_12
SRR11109845_L001_R1_001	0	0	0	0	1	0	1	0	0	1	0	0	2018	Italy	Pig	ST398_12
SRR11109846_L001_R1_001	0	0	0	0	1	0	1	0	0	1	0	0	2018	Italy	Human	ST398_12
SRR11109847_L001_R1_001	0	0	0	0	1	0	1	0	0	1	0	0	2018	Italy	Human	ST398_12
SRR11109848_L001_R1_001	0	0	0	0	1	0	1	0	0	1	0	0	2018	Italy	Human	ST398_24
SRR11109849_L001_R1_001	0	0	0	0	1	0	1	0	0	1	0	0	2018	Italy	Pig	ST398_24
SRR11109850_L001_R1_001	0	0	0	0	1	0	1	0	0	1	0	0	2018	Italy	Pig	ST398_24
SRR11109851_L001_R1_001	0	0	0	0	1	0	1	0	0	1	0	0	2018	Italy	Pig	ST398_24
SRR11109852_L001_R1_001	0	0	0	0	1	0	1	0	0	1	0	0	2018	Italy	Pig	ST398_24
SRR11109853_L001_R1_001	0	0	0	0	1	0	1	0	0	1	0	0	2018	Italy	Pig	ST398_24
SRR11109854_L001_R1_001	0	0	0	0	1	0	1	0	0	1	0	0	2018	Italy	Pig	ST398_24
SRR11109855_L001_R1_001	0	0	0	0	1	0	1	0	0	1	0	0	2018	Italy	Pig	ST398_24
SRR11109856_L001_R1_001	0	0	0	0	1	0	1	0	0	1	0	0	2018	Italy	Pig	ST398_24
SRR11109857_L001_R1_001	0	0	0	0	1	0	1	0	0	1	0	0	2018	Italy	Human	ST398_24
SRR11109858_L001_R1_001	0	0	0	0	1	0	1	0	0	1	0	0	2018	Italy	Human	ST398_24
SRR11109859_L001_R1_001	0	0	0	0	1	0	1	0	0	1	0	0	2018	Italy	Pig	ST398_12
SRR11109860_L001_R1_001	0	0	0	1	0	0	0	0	0	1	0	0	2018	Italy	Pig	ST398_16
SRR11109861_L001_R1_001	0	0	0	1	0	0	0	0	0	1	0	0	2018	Italy	Pig	ST398_16
SRR11109862_L001_R1_001	0	0	0	1	0	0	0	0	0	1	0	0	2018	Italy	Pig	ST398_16
SRR11109863_L001_R1_001	0	0	0	1	0	0	0	0	0	1	0	0	2018	Italy	Pig	ST398_16
SRR11109864_L001_R1_001	0	0	0	1	0	0	0	0	0	1	0	0	2018	Italy	Pig	ST398_16
SRR11109865_L001_R1_001	0	0	0	1	0	0	0	0	0	1	0	0	2018	Italy	Pig	ST398_16
SRR11109866_L001_R1_001	0	0	0	1	0	0	0	0	0	1	0	0	2018	Italy	Pig	ST398_16
SRR11109867_L001_R1_001	0	0	0	1	0	0	0	0	0	1	0	0	2018	Italy	Human	ST398_16
SRR11109868_L001_R1_001	0	0	0	0	1	0	1	0	0	1	0	0	2018	Italy	Pig	ST398_24
SRR11109869_L001_R1_001	0	0	0	0	1	0	1	0	0	1	0	0	2018	Italy	Pig	ST398_23
SRR11109870_L001_R1_001	0	0	0	0	1	0	1	0	0	1	0	0	2018	Italy	Pig	ST398_12
SRR11109871_L001_R1_001	0	0	0	0	1	0	1	0	0	1	0	0	2018	Italy	Pig	ST398_23
SRR11109872_L001_R1_001	0	0	0	0	1	0	1	0	0	1	0	0	2018	Italy	Pig	ST398_24
SRR11109873_L001_R1_001	0	0	0	0	1	0	1	0	0	1	0	0	2018	Italy	Pig	ST398_23
SRR11109874_L001_R1_001	0	0	0	0	1	0	1	0	0	1	0	0	2018	Italy	Pig	ST398_23
SRR11109875_L001_R1_001	0	0	0	0	1	0	1	0	0	1	0	0	2018	Italy	Pig	ST398_24
SRR11109876_L001_R1_001	0	0	0	0	1	0	1	0	0	1	0	0	2018	Italy	Pig	ST398_24
SRR11109877_L001_R1_001	0	0	0	0	1	0	1	0	0	1	0	0	2018	Italy	Pig	ST398_23
SRR11109878_L001_R1_001	0	0	0	0	1	0	1	0	0	1	0	0	2018	Italy	Pig	ST398_24
SRR11109879_L001_R1_001	0	0	0	0	1	0	1	0	0	1	0	0	2018	Italy	Pig	ST398_23
SRR11109880_L001_R1_001	0	0	0	0	1	0	1	0	0	1	0	0	2018	Italy	Pig	ST398_23
SRR11109881_L001_R1_001	0	0	0	0	1	0	1	0	0	1	0	0	2018	Italy	Human	ST398_12
SRR11109882_L001_R1_001	0	0	0	0	1	0	1	0	0	1	0	0	2018	Italy	Pig	ST398_24
SRR11109883_L001_R1_001	0	0	0	0	1	0	1	0	0	1	0	0	2018	Italy	Pig	ST398_23
SRR11109884_L001_R1_001	0	0	0	0	1	0	1	0	0	1	0	0	2018	Italy	Pig	ST398_23
SRR11109885_L001_R1_001	0	0	0	0	1	0	1	0	0	1	0	0	2018	Italy	Pig	ST398_23
SRR11109886_L001_R1_001	0	0	0	0	1	0	1	0	0	1	0	0	2018	Italy	Human	ST398_23
SRR11109887_L001_R1_001	0	0	0	0	1	0	1	0	0	1	0	0	2018	Italy	Pig	ST398_24
SRR11109888_L001_R1_001	0	0	0	0	1	0	1	0	0	1	0	0	2018	Italy	Pig	ST398_24
SRR11109889_L001_R1_001	0	0	0	0	1	0	1	0	0	1	0	0	2018	Italy	Pig	ST398_24
SRR11109890_L001_R1_001	0	0	0	0	1	0	1	0	0	1	0	0	2018	Italy	Pig	ST398_24
SRR11109891_L001_R1_001	0	0	0	0	1	0	1	0	0	1	0	0	2018	Italy	Pig	ST398_24
SRR11109892_L001_R1_001	0	0	0	1	0	0	0	0	0	1	0	0	2018	Italy	Pig	ST398_16
SRR11109893_L001_R1_001	0	0	0	1	0	0	0	0	0	1	0	0	2018	Italy	Human	ST398_16
SRR11484007_L001_R1_001	0	0	0	1	0	0	0	0	0	1	0	0	2014	Italy	Human	ST398_16
SRR11484008_L001_R1_001	0	0	0	0	1	0	1	0	0	1	0	0	2013	Italy	Cattle	ST398_16
SRR11484009_L001_R1_001	0	0	0	1	1	0	1	0	0	1	0	0	2013	Italy	Cattle	ST398_16
SRR11484010_L001_R1_001	0	0	0	1	0	0	0	0	0	1	0	0	2014	Italy	Human	ST398_16
SRR11484011_L001_R1_001	0	0	0	1	0	0	0	0	0	1	0	0	2013	Italy	Cattle	ST398_16
SRR11484012_L001_R1_001	0	0	0	0	1	0	1	0	0	1	0	0	2014	Italy	Human	ST398_16
SRR11484013_L001_R1_001	0	0	0	0	1	0	1	0	0	1	0	0	2013	Italy	Cattle	ST398_16
SRR11526821_L001_R1_001	0	0	0	0	0	0	0	0	0	1	0	0	2018	China	Human	ST398_2
SRR11526822_L001_R1_001	0	0	0	0	0	0	0	0	0	1	0	0	2018	China	Human	ST398_3
SRR11526823_L001_R1_001	0	0	0	0	0	0	0	0	0	1	0	0	2018	China	Human	ST398_2
SRR11526824_L001_R1_001	0	0	0	0	0	0	0	0	0	1	0	0	2018	China	Human	ST398_3
SRR11526825_L001_R1_001	0	0	0	0	0	0	0	0	0	1	0	0	2018	China	Human	ST398_3
SRR11526826_L001_R1_001	0	0	0	0	0	0	0	0	0	1	0	0	2015	China	Human	ST398_3
SRR11526827_L001_R1_001	0	0	0	0	0	0	0	0	0	1	0	0	2018	China	Human	ST398_3
SRR11526828_L001_R1_001	0	0	0	0	0	0	0	0	0	1	0	0	2018	China	Human	ST398_2
SRR11526829_L001_R1_001	0	0	0	0	0	0	0	0	0	1	0	0	2017	China	Human	ST398_2
SRR11526831_L001_R1_001	0	0	0	0	0	0	0	0	0	1	0	0	2017	China	Human	ST398_2
SRR11526832_L001_R1_001	0	0	0	0	0	0	0	0	0	1	0	0	2017	China	Human	ST398_2
SRR11526833_L001_R1_001	0	0	0	0	0	0	0	0	0	1	0	0	2017	China	Human	ST398_2
SRR11526834_L001_R1_001	0	0	0	0	0	0	0	0	0	1	0	0	2017	China	Human	ST398_2
SRR11526835_L001_R1_001	0	0	0	0	0	0	0	0	0	1	0	0	2017	China	Human	ST398_3
SRR11526836_L001_R1_001	0	0	0	0	0	0	0	0	0	1	0	0	2017	China	Human	ST398_2
SRR11526837_L001_R1_001	0	0	0	0	0	0	0	0	0	1	0	0	2015	China	Human	ST398_2
SRR11526838_L001_R1_001	0	0	0	0	0	0	0	0	0	1	0	0	2017	China	Human	ST398_3
SRR11526839_L001_R1_001	0	0	0	0	0	0	0	0	0	1	0	0	2017	China	Human	ST398_2
SRR11526840_L001_R1_001	0	0	0	0	0	0	0	0	0	1	0	0	2017	China	Human	ST398_3
SRR11526841_L001_R1_001	0	0	0	0	0	0	0	0	0	1	0	0	2017	China	Human	ST398_2
SRR11526842_L001_R1_001	0	0	0	0	0	0	0	0	0	1	0	0	2017	China	Human	ST398_2
SRR11526843_L001_R1_001	0	0	0	0	0	0	0	0	0	1	1	1	2017	China	Human	ST398_21
SRR11526844_L001_R1_001	0	0	0	0	0	0	0	0	0	1	0	0	2017	China	Human	ST398_2
SRR11526845_L001_R1_001	0	0	0	0	0	0	0	0	0	1	0	0	2017	China	Human	ST398_2
SRR11526846_L001_R1_001	0	0	0	0	0	0	0	0	0	1	0	0	2017	China	Human	ST398_2
SRR11526847_L001_R1_001	0	0	0	0	0	0	0	0	0	1	0	0	2017	China	Human	ST398_2
SRR11526848_L001_R1_001	0	0	0	0	0	0	0	0	0	1	0	0	2015	China	Human	ST398_3
SRR11526849_L001_R1_001	0	0	0	0	0	0	0	0	0	1	0	0	2016	China	Human	ST398_2
SRR11526850_L001_R1_001	0	0	0	0	0	0	0	0	0	1	0	0	2016	China	Human	ST398_2
SRR11526851_L001_R1_001	0	0	0	0	0	0	0	0	0	1	0	0	2016	China	Human	ST398_2
SRR11526852_L001_R1_001	0	0	0	0	0	0	0	0	0	1	0	0	2016	China	Human	ST398_3
SRR11526853_L001_R1_001	0	0	0	0	0	0	0	0	0	1	0	0	2016	China	Human	ST398_3
SRR11526854_L001_R1_001	0	0	0	0	0	0	0	0	0	1	0	0	2016	China	Human	ST398_3
SRR11526855_L001_R1_001	0	0	0	0	0	0	0	0	0	1	0	0	2016	China	Human	ST398_2
SRR11526856_L001_R1_001	0	0	0	0	0	0	0	0	0	1	0	0	2016	China	Human	ST398_3
SRR11526857_L001_R1_001	0	0	0	0	0	0	0	0	0	1	0	0	2016	China	Human	ST398_2
SRR11526858_L001_R1_001	0	0	0	0	0	0	0	0	0	1	0	0	2016	China	Human	ST398_3
SRR11526859_L001_R1_001	0	0	0	0	0	0	0	0	0	1	0	0	2016	China	Human	ST398_2
SRR11526860_L001_R1_001	0	0	0	0	0	0	0	0	0	1	0	0	2015	China	Human	ST398_2
SRR11526863_L001_R1_001	0	0	0	0	0	0	0	0	0	1	0	0	2015	China	Human	ST398_2
SRR11526866_L001_R1_001	0	0	0	0	0	0	0	0	0	1	0	0	2018	China	Human	ST398_2
SRR11526867_L001_R1_001	0	0	0	0	0	0	0	0	0	1	0	0	2018	China	Human	ST398_3
SRR11526868_L001_R1_001	0	0	0	0	0	0	0	0	0	1	0	0	2018	China	Human	ST398_3
SRR11526869_L001_R1_001	0	0	0	0	1	0	1	0	0	1	1	1	2016	China	Human	ST398_21
SRR11526870_L001_R1_001	0	0	0	0	0	0	0	0	0	1	0	1	2016	China	Human	ST398_2
SRR11526871_L001_R1_001	0	0	0	0	0	0	0	0	0	1	0	0	2015	China	Human	ST398_2
SRR11526872_L001_R1_001	0	0	0	0	0	0	0	0	0	1	0	0	2015	China	Human	ST398_2
SRR12000040_L001_R1_001	0	0	0	0	0	0	0	0	0	0	0	0	2014	Brazil	Pig	ST398_16
SRR1202653_L001_R1_001	0	0	0	0	1	0	1	0	0	1	0	0	2009	The Netherlands	Human	ST398_8
SRR1202666_L001_R1_001	0	0	0	0	1	0	1	0	0	1	0	0	2009	The Netherlands	Human	ST398_8
SRR1202677_L001_R1_001	0	0	0	0	1	0	1	0	0	1	0	0	2009	The Netherlands	Human	ST398_8
SRR1202687_L001_R1_001	0	0	0	1	0	0	0	0	0	1	0	0	2009	The Netherlands	Human	ST398_26
SRR1202695_L001_R1_001	0	0	0	0	1	0	1	0	0	1	0	0	2009	The Netherlands	Human	ST398_25
SRR1202701_L001_R1_001	0	0	0	0	1	0	1	0	0	1	0	0	2009	The Netherlands	Human	ST398_8
SRR1202704_L001_R1_001	0	0	0	0	1	0	1	0	0	1	0	0	2009	The Netherlands	Human	ST398_8
SRR1202712_L001_R1_001	0	0	0	0	1	0	1	0	0	1	0	0	2009	The Netherlands	Human	ST398_8
SRR1202715_L001_R1_001	0	0	0	0	1	0	1	0	0	1	0	0	2009	The Netherlands	Human	ST398_25
SRR1202723_L001_R1_001	0	0	0	0	1	0	1	0	0	1	0	0	2009	The Netherlands	Human	ST398_25
SRR1212958_L001_R1_001	0	0	0	0	1	0	1	0	0	1	0	0	2009	Austria	Meleagris gallopavo	ST398_13
SRR1212959_L001_R1_001	0	0	0	0	1	0	1	0	0	1	0	0	2009	The Netherlands	Human	ST398_22
SRR1212960_L001_R1_001	0	0	0	0	1	0	1	0	0	1	0	0	2009	The Netherlands	Human	ST398_25
SRR1212961_L001_R1_001	0	0	0	0	1	0	1	0	0	1	0	0	2009	The Netherlands	Human	ST398_25
SRR1212962_L001_R1_001	0	0	0	1	0	0	0	0	0	1	0	0	2011	The Netherlands	Cattle	ST398_26
SRR1212964_L001_R1_001	0	0	0	1	0	0	0	0	0	1	0	0	2009	The Netherlands	Human	ST398_26
SRR1212966_L001_R1_001	0	0	0	0	0	0	0	0	0	0	0	0	2007	The Netherlands	Pig	ST398_20
SRR1212967_L001_R1_001	0	0	0	0	0	0	0	0	0	1	0	0	2009	The Netherlands	Human	ST398_25
SRR1212968_L001_R1_001	0	0	0	0	1	0	1	0	0	1	0	0	2009	The Netherlands	Human	ST398_8
SRR1212969_L001_R1_001	0	0	0	0	1	0	1	0	0	1	0	0	2009	The Netherlands	Human	ST398_25
SRR1212970_L001_R1_001	0	0	0	0	1	0	1	0	0	1	0	0	2009	The Netherlands	Human	ST398_23
SRR1212974_L001_R1_001	0	0	0	0	1	0	1	0	0	1	0	0	2009	The Netherlands	Human	ST398_4
SRR1212975_L001_R1_001	0	0	0	0	1	0	1	0	0	1	0	0	2009	The Netherlands	Human	ST398_4
SRR1212976_L001_R1_001	0	0	0	0	1	0	1	0	0	1	0	0	2009	The Netherlands	Human	ST398_4
SRR1212977_L001_R1_001	0	0	0	1	0	0	0	0	0	1	0	0	2010	The Netherlands	Pig	ST398_26
SRR1212978_L001_R1_001	0	0	0	0	1	0	1	0	0	1	0	0	2007	The Netherlands	Pig	ST398_7
SRR1212979_L001_R1_001	0	0	0	0	1	0	1	0	0	1	0	0	2009	The Netherlands	Human	ST398_25
SRR1212980_L001_R1_001	0	0	0	0	1	0	1	0	0	1	0	0	2009	The Netherlands	Human	ST398_8
SRR1212981_L001_R1_001	0	0	0	0	1	0	1	0	0	1	0	0	2009	The Netherlands	Human	ST398_6
SRR1212982_L001_R1_001	0	0	0	0	1	0	1	0	0	1	0	0	2009	The Netherlands	Human	ST398_23
SRR1212983_L001_R1_001	0	0	0	0	1	0	1	0	0	1	0	0	2010	The Netherlands	Pig	ST398_20
SRR1212984_L001_R1_001	0	0	0	0	1	0	1	0	0	1	0	0	2009	Italy	Meleagris gallopavo	ST398_13
SRR1212985_L001_R1_001	0	0	0	0	1	0	1	0	0	1	0	0	2008	Belgium	Rat	ST398_24
SRR1212987_L001_R1_001	0	0	0	1	0	0	0	0	0	1	0	0	2009	The Netherlands	Human	ST398_11
SRR1213065_L001_R1_001	0	0	0	1	0	0	0	0	0	1	0	0	2009	The Netherlands	Human	ST398_26
SRR1213066_L001_R1_001	0	0	0	0	1	0	1	0	0	1	0	0	2010	The Netherlands	Pig	ST398_8
SRR1213068_L001_R1_001	0	0	0	0	1	0	1	0	0	1	0	0	2010	Germany	Poultry	ST398_23
SRR1213072_L001_R1_001	0	0	0	0	1	0	1	0	0	1	0	0	2009	The Netherlands	Human	ST398_22
SRR1213074_L001_R1_001	0	0	0	1	0	0	0	0	0	1	0	0	2009	The Netherlands	Human	ST398_26
SRR1213075_L001_R1_001	0	0	0	0	1	0	1	0	0	1	0	0	2009	The Netherlands	Human	ST398_23
SRR1213076_L001_R1_001	0	0	0	1	0	0	0	0	0	1	0	0	2009	The Netherlands	Human	ST398_26
SRR1213077_L001_R1_001	0	0	0	0	1	0	1	0	0	1	0	0	2009	The Netherlands	Human	ST398_25
SRR1213079_L001_R1_001	0	0	0	0	1	0	1	0	0	1	0	0	2009	The Netherlands	Human	ST398_8
SRR1213080_L001_R1_001	0	0	0	0	1	0	1	0	0	1	0	0	2009	The Netherlands	Human	ST398_7
SRR1213081_L001_R1_001	0	0	0	1	0	0	0	0	0	1	0	0	2009	The Netherlands	Human	ST398_26
SRR1213082_L001_R1_001	0	0	0	0	1	0	1	0	0	1	0	0	2009	The Netherlands	Human	ST398_7
SRR1213083_L001_R1_001	0	0	0	0	1	0	1	0	0	1	0	0	2009	The Netherlands	Human	ST398_25
SRR1213111_L001_R1_001	0	0	0	0	1	0	1	0	0	1	0	0	2009	The Netherlands	Human	ST398_5
SRR1213112_L001_R1_001	0	0	0	0	1	0	1	0	0	1	0	0	2009	The Netherlands	Human	ST398_22
SRR1213113_L001_R1_001	0	0	0	0	1	0	1	0	0	1	0	0	2009	The Netherlands	Human	ST398_25
SRR1213114_L001_R1_001	0	0	0	0	1	0	1	0	0	1	0	0	2009	The Netherlands	Human	ST398_25
SRR1213116_L001_R1_001	0	0	0	0	1	0	1	0	0	1	0	0	2009	The Netherlands	Human	ST398_7
SRR1213119_L001_R1_001	0	0	0	1	0	0	0	0	0	1	0	0	2009	The Netherlands	Human	ST398_26
SRR1213120_L001_R1_001	0	0	0	0	1	0	1	0	0	1	0	0	2011	Germany	Cattle	ST398_15
SRR1213121_L001_R1_001	0	0	0	0	1	0	1	0	0	1	0	0	2009	The Netherlands	Human	ST398_4
SRR1213122_L001_R1_001	0	0	0	1	0	0	0	0	0	1	0	0	2010	The Netherlands	Cattle	ST398_26
SRR1213147_L001_R1_001	0	0	0	0	0	0	0	0	0	0	0	0	2007	The Netherlands	Pig	ST398_25
SRR1213155_L001_R1_001	0	0	0	0	1	0	1	0	0	1	0	0	2009	The Netherlands	Human	ST398_25
SRR1213187_L001_R1_001	0	0	0	0	1	0	1	0	0	1	0	0	2011	Germany	Poultry	ST398_25
SRR1213709_L001_R1_001	0	0	0	0	1	0	1	0	0	1	0	0	2009	The Netherlands	Human	ST398_8
SRR1213807_L001_R1_001	0	0	0	0	1	0	1	0	0	1	0	0	2009	The Netherlands	Human	ST398_8
SRR1213839_L001_R1_001	0	0	0	0	1	0	1	0	0	1	0	0	2009	The Netherlands	Human	ST398_25
SRR1213849_L001_R1_001	0	0	0	0	1	0	1	0	0	1	0	0	2009	The Netherlands	Human	ST398_23
SRR1213850_L001_R1_001	0	0	0	0	1	0	1	0	0	1	0	0	2009	Germany	Poultry	ST398_25
SRR1213852_L001_R1_001	0	0	0	1	0	0	0	0	0	1	0	0	2009	The Netherlands	Human	ST398_26
SRR1218543_L001_R1_001	0	0	0	0	0	0	0	0	0	0	0	0	2007	The Netherlands	Human	ST398_14
SRR1218544_L001_R1_001	0	0	0	0	1	0	1	0	0	1	0	0	2012	Spain	Human	ST398_25
SRR1218548_L001_R1_001	0	0	0	0	1	0	1	0	0	1	0	0	2011	Germany	Poultry	ST398_13
SRR1218549_L001_R1_001	0	0	0	0	0	0	0	0	0	0	0	0	2013	Trinidad and Tobago	Human	ST398_10
SRR1218550_L001_R1_001	0	0	0	0	1	0	1	0	0	1	0	0	2007	Spain	Pig	ST398_16
SRR1218551_L001_R1_001	0	0	0	0	0	0	0	0	0	0	0	0	2011	China	Rat	ST398_21
SRR1218552_L001_R1_001	0	0	0	0	1	0	1	0	0	1	0	0	2006	Belgium	Poultry	ST398_25
SRR1218553_L001_R1_001	0	0	0	0	0	0	0	0	0	0	0	0	2010	China	Rat	ST398_21
SRR1218555_L001_R1_001	0	0	0	1	0	0	0	0	0	1	0	0	2011	Spain	Horse	ST398_26
SRR1218632_L001_R1_001	0	0	0	1	0	0	0	0	0	1	0	0	2012	The Netherlands	Human	ST398_14
SRR1218633_L001_R1_001	0	0	0	1	0	0	0	0	0	1	0	0	2008	The Netherlands	Human	ST398_14
SRR1218638_L001_R1_001	0	0	0	1	0	0	0	0	0	1	0	0	2010	Spain	Human	ST398_14
SRR1218639_L001_R1_001	0	0	0	1	0	0	0	0	0	1	0	0	2006	Belgium	Poultry	ST398_26
SRR1218640_L001_R1_001	0	0	0	1	1	0	1	0	0	1	0	0	2010	The Netherlands	Human	ST398_16
SRR1218641_L001_R1_001	0	0	0	1	0	0	0	0	0	1	0	0	2006	Belgium	Poultry	ST398_26
SRR1218645_L001_R1_001	0	0	0	0	1	0	1	0	0	1	0	0	2009	Spain	Pig	ST398_25
SRR1218663_L001_R1_001	0	0	0	0	0	0	0	0	0	0	0	0	2008	The Netherlands	Human	ST398_16
SRR1218669_L001_R1_001	0	0	0	0	1	0	1	0	0	1	0	0	2008	The Netherlands	Pig	ST398_16
SRR1218674_L001_R1_001	0	0	0	1	0	0	0	0	0	1	0	0	2012	The Netherlands	Human	ST398_14
SRR1218676_L001_R1_001	0	0	0	1	0	0	0	0	0	1	0	0	2011	The Netherlands	Human	ST398_14
SRR1218677_L001_R1_001	0	0	0	0	1	0	1	0	0	1	0	0	2010	The Netherlands	Sheep	ST398_25
SRR1218678_L001_R1_001	0	0	0	1	0	0	0	0	0	1	0	0	2007	The Netherlands	Poultry	ST398_14
SRR1218680_L001_R1_001	0	0	0	0	1	0	1	0	0	1	0	0	2009	Spain	Human	ST398_25
SRR1218681_L001_R1_001	0	0	0	1	0	0	0	0	0	1	0	0	2006	Belgium	Poultry	ST398_26
SRR1218683_L001_R1_001	0	0	0	0	1	0	1	0	0	1	0	0	2009	Germany	Meleagris gallopavo	ST398_25
SRR1252014_L001_R1_001	0	0	0	0	1	0	1	0	0	1	0	0	2010	Germany	Poultry	ST398_13
SRR1290873_L001_R1_001	0	0	0	0	0	0	0	0	0	0	0	0	2010	China	Pig	ST398_18
SRR1290876_L001_R1_001	0	0	0	1	0	0	0	0	0	1	0	0	2009	Germany	Meleagris gallopavo	ST398_14
SRR1293379_L001_R1_001	0	0	0	0	1	0	1	0	0	1	0	0	2009	The Netherlands	Human	ST398_25
SRR1293383_L001_R1_001	0	0	0	0	1	0	1	0	0	1	0	0	2009	The Netherlands	Human	ST398_20
SRR1293384_L001_R1_001	0	0	0	0	1	0	1	0	0	1	0	0	2009	The Netherlands	Human	ST398_6
SRR1293388_L001_R1_001	0	0	0	0	1	0	1	0	0	1	0	0	2009	The Netherlands	Human	ST398_22
SRR1293392_L001_R1_001	0	0	0	0	0	0	0	0	0	1	0	0	2009	The Netherlands	Human	ST398_25
SRR1293393_L001_R1_001	0	0	0	0	1	0	1	0	0	1	0	0	2007	The Netherlands	Pig	ST398_7
SRR1293394_L001_R1_001	0	0	0	0	1	0	1	0	0	1	0	0	2009	The Netherlands	Human	ST398_22
SRR1293396_L001_R1_001	0	0	0	0	0	0	0	0	0	1	0	0	2009	The Netherlands	Human	ST398_25
SRR1293408_L001_R1_001	0	0	0	0	1	0	1	0	0	1	0	0	2009	The Netherlands	Human	ST398_6
SRR1293409_L001_R1_001	0	0	0	0	1	0	1	0	0	1	0	0	2009	The Netherlands	Human	ST398_22
SRR1293410_L001_R1_001	0	0	0	1	0	0	0	0	0	1	0	0	2009	The Netherlands	Human	ST398_26
SRR1293411_L001_R1_001	0	0	0	0	1	0	1	0	0	1	0	0	2009	The Netherlands	Human	ST398_22
SRR1293412_L001_R1_001	0	0	0	0	1	0	1	0	0	1	0	0	2012	Germany	Cattle	ST398_15
SRR1293415_L001_R1_001	0	0	0	0	1	0	1	0	0	1	0	0	2009	The Netherlands	Human	ST398_22
SRR1293416_L001_R1_001	0	0	0	0	1	0	1	0	0	1	0	0	2009	The Netherlands	Human	ST398_25
SRR1293417_L001_R1_001	0	0	0	0	1	0	1	0	0	1	0	0	2009	The Netherlands	Human	ST398_7
SRR1293418_L001_R1_001	0	0	0	1	0	0	0	0	0	1	0	0	2009	The Netherlands	Human	ST398_26
SRR1293419_L001_R1_001	0	0	0	1	0	0	0	0	0	1	0	0	2006	The Netherlands	Human	ST398_14
SRR1293420_L001_R1_001	0	0	0	0	1	0	1	0	0	1	0	0	2009	The Netherlands	Human	ST398_7
SRR1293422_L001_R1_001	0	0	0	0	0	0	0	0	0	1	0	0	2010	The Netherlands	Human	ST398_7
SRR1293495_L001_R1_001	0	0	0	0	1	0	1	0	0	1	0	0	2009	The Netherlands	Human	ST398_24
SRR1293496_L001_R1_001	0	0	0	0	1	0	1	0	0	1	0	0	2010	Germany	Poultry	ST398_13
SRR1293497_L001_R1_001	0	0	0	0	1	0	1	0	0	1	0	0	2010	The Netherlands	Human	ST398_25
SRR1293498_L001_R1_001	0	0	0	1	0	0	0	0	0	1	0	0	2009	The Netherlands	Human	ST398_26
SRR1293499_L001_R1_001	0	0	0	0	1	0	1	0	0	1	0	0	2009	The Netherlands	Human	ST398_6
SRR1293501_L001_R1_001	0	0	0	1	0	0	0	0	0	1	0	0	2009	The Netherlands	Human	ST398_26
SRR1293503_L001_R1_001	0	0	0	0	1	0	1	0	0	1	0	0	2009	The Netherlands	Human	ST398_6
SRR1293504_L001_R1_001	0	0	0	0	1	0	1	0	0	1	0	0	2009	The Netherlands	Human	ST398_23
SRR1293505_L001_R1_001	0	0	0	0	1	0	1	0	0	1	0	0	2007	The Netherlands	Pig	ST398_5
SRR1293506_L001_R1_001	0	0	0	0	1	0	1	0	0	1	0	0	2009	Austria	Poultry	ST398_23
SRR1293508_L001_R1_001	0	0	0	1	0	0	0	0	0	1	0	0	2009	The Netherlands	Human	ST398_26
SRR1293509_L001_R1_001	0	0	0	0	1	0	1	0	0	1	0	0	2009	The Netherlands	Human	ST398_25
SRR1293561_L001_R1_001	0	0	0	0	0	0	0	0	0	1	0	0	2007	The Netherlands	Pig	ST398_7
SRR1293569_L001_R1_001	0	0	0	0	1	0	1	0	0	1	0	0	2009	The Netherlands	Human	ST398_8
SRR1293577_L001_R1_001	0	0	0	0	1	0	1	0	0	1	0	0	2009	The Netherlands	Human	ST398_6
SRR1293597_L001_R1_001	0	0	0	0	1	0	1	0	0	1	0	0	2009	The Netherlands	Human	ST398_22
SRR1293608_L001_R1_001	0	0	0	0	1	0	1	0	0	1	0	0	2009	The Netherlands	Human	ST398_25
SRR1293609_L001_R1_001	0	0	0	1	0	0	0	0	0	1	0	0	2009	The Netherlands	Human	ST398_26
SRR1293610_L001_R1_001	0	0	0	0	1	0	1	0	0	1	0	0	2009	Germany	Meleagris gallopavo	ST398_20
SRR1293624_L001_R1_001	0	0	0	0	1	0	1	0	0	1	0	0	2010	The Netherlands	Cattle	ST398_7
SRR1293629_L001_R1_001	0	0	0	0	1	0	1	0	0	1	0	0	2009	The Netherlands	Human	ST398_6
SRR1293636_L001_R1_001	0	0	0	1	0	0	0	0	0	1	0	0	2009	The Netherlands	Human	ST398_26
SRR1293657_L001_R1_001	0	0	0	1	0	0	0	0	0	1	0	0	2011	Denmark	Poultry	ST398_14
SRR1293659_L001_R1_001	0	0	0	1	0	0	0	0	0	1	0	0	2010	The Netherlands	Cattle	ST398_26
SRR1293660_L001_R1_001	0	0	0	0	1	0	1	0	0	1	0	0	2009	The Netherlands	Human	ST398_6
SRR1293667_L001_R1_001	0	0	0	1	0	0	0	0	0	1	0	0	2008	Germany	Cattle	ST398_26
SRR1293674_L001_R1_001	0	0	0	0	1	0	1	0	0	1	0	0	2009	The Netherlands	Human	ST398_25
SRR1293677_L001_R1_001	0	0	0	0	0	0	0	0	0	1	0	0	2009	The Netherlands	Human	ST398_7
SRR1293681_L001_R1_001	0	0	0	1	0	0	0	0	0	1	0	0	2009	The Netherlands	Human	ST398_26
SRR12999993_L001_R1_001	0	0	0	0	0	0	0	0	0	0	0	0	2016	Italy	Human	ST398_10
SRR12999994_L001_R1_001	0	0	0	0	0	0	0	0	0	0	0	0	2016	Italy	Human	ST398_10
SRR1300903_L001_R1_001	0	0	0	1	0	0	0	0	0	1	0	0	2008	The Netherlands	Human	ST398_14
SRR1300904_L001_R1_001	0	0	0	1	0	0	0	0	0	1	0	0	2005	Spain	Horse	ST398_25
SRR1300907_L001_R1_001	0	0	0	0	1	0	1	0	0	1	0	0	2006	Belgium	Poultry	ST398_25
SRR1302880_L001_R1_001	0	0	0	0	0	0	0	0	0	0	0	0	2007	The Netherlands	Pig	ST398_5
SRR1302881_L001_R1_001	0	0	0	1	0	0	0	0	0	1	0	0	2010	The Netherlands	Horse	ST398_26
SRR1302882_L001_R1_001	0	0	0	1	1	0	1	0	0	1	0	0	2008	The Netherlands	Cattle	ST398_16
SRR1302883_L001_R1_001	0	0	0	1	0	0	0	0	0	1	0	0	2009	The Netherlands	Human	ST398_24
SRR1302884_L001_R1_001	0	0	0	0	0	0	0	0	0	0	0	0	2012	Trinidad and Tobago	Human	ST398_10
SRR1302885_L001_R1_001	0	0	0	1	0	0	0	0	0	1	0	0	2009	The Netherlands	Human	ST398_26
SRR1302887_L001_R1_001	0	0	0	0	1	0	1	0	0	1	0	0	2009	The Netherlands	Human	ST398_7
SRR1302888_L001_R1_001	0	0	0	0	1	0	1	0	0	1	0	0	2007	The Netherlands	Human	ST398_7
SRR1302890_L001_R1_001	0	0	0	1	0	0	0	0	0	1	0	0	2008	The Netherlands	Meleagris gallopavo	ST398_14
SRR1302891_L001_R1_001	0	0	0	1	0	0	0	0	0	1	0	0	2010	The Netherlands	Cattle	ST398_26
SRR1302892_L001_R1_001	0	0	0	0	0	0	0	0	0	0	0	0	2011	China	Poultry	ST398_18
SRR1302893_L001_R1_001	0	0	0	0	1	0	1	0	0	1	0	0	2010	The Netherlands	Cattle	ST398_25
SRR1302894_L001_R1_001	0	0	0	0	1	0	1	0	0	1	0	0	2009	The Netherlands	Human	ST398_25
SRR1302896_L001_R1_001	0	0	0	0	0	0	0	0	0	0	0	0	2011	China	Poultry	ST398_18
SRR1302897_L001_R1_001	0	0	0	0	1	0	1	0	0	1	0	0	2012	The Netherlands	Human	ST398_16
SRR1302898_L001_R1_001	0	0	0	1	0	0	0	0	0	1	0	0	2009	The Netherlands	Human	ST398_26
SRR1302915_L001_R1_001	0	0	0	0	1	0	1	0	0	1	0	0	2009	The Netherlands	Human	ST398_16
SRR1302916_L001_R1_001	0	0	0	1	0	0	0	0	0	1	0	0	2009	The Netherlands	Human	ST398_26
SRR1302917_L001_R1_001	0	0	0	0	1	0	1	0	0	1	0	0	2011	The Netherlands	Human	ST398_24
SRR1302918_L001_R1_001	0	0	0	1	0	0	0	0	0	1	0	0	2009	The Netherlands	Human	ST398_26
SRR1303233_L001_R1_001	0	0	0	0	1	0	1	0	0	1	0	0	2011	The Netherlands	Human	ST398_22
SRR1303235_L001_R1_001	0	0	0	1	0	0	0	0	0	1	0	0	2011	The Netherlands	Human	ST398_26
SRR1303236_L001_R1_001	0	0	0	0	0	0	0	0	0	0	0	0	2011	China	Rat	ST398_21
SRR1303237_L001_R1_001	0	0	0	1	0	0	0	0	0	1	0	0	2011	The Netherlands	Human	ST398_26
SRR1303241_L001_R1_001	0	0	0	0	1	0	1	0	0	1	0	0	2009	Spain	Human	ST398_25
SRR1303242_L001_R1_001	0	0	0	0	1	0	1	0	0	1	0	0	2008	Germany	Cattle	ST398_23
SRR1303267_L001_R1_001	0	0	0	0	0	0	0	0	0	0	0	0	2011	The Netherlands	Human	ST398_23
SRR1303270_L001_R1_001	0	0	0	1	1	0	1	0	0	1	0	0	2010	The Netherlands	Cattle	ST398_26
SRR1303271_L001_R1_001	0	0	0	1	0	0	0	0	0	1	0	0	2008	The Netherlands	Human	ST398_26
SRR1303273_L001_R1_001	0	0	0	0	0	0	0	0	0	0	0	0	2007	The Netherlands	Human	ST398_14
SRR1303275_L001_R1_001	0	0	0	0	1	0	1	0	0	1	0	0	2009	The Netherlands	Human	ST398_7
SRR1303277_L001_R1_001	0	0	0	1	0	0	0	0	0	1	0	0	2009	The Netherlands	Human	ST398_26
SRR1303278_L001_R1_001	0	0	0	0	1	0	1	0	0	1	0	0	2009	The Netherlands	Human	ST398_22
SRR1303279_L001_R1_001	0	0	0	1	0	0	0	0	0	1	0	0	2008	The Netherlands	Human	ST398_26
SRR1303280_L001_R1_001	0	0	0	0	0	0	0	0	0	0	0	0	2009	Spain	Human	ST398_10
SRR1303282_L001_R1_001	0	0	0	0	1	0	1	0	0	1	0	0	2009	Spain	Human	ST398_25
SRR1303287_L001_R1_001	0	0	0	0	1	0	1	0	0	1	0	0	2011	Germany	Poultry	ST398_25
SRR1303289_L001_R1_001	0	0	0	0	0	0	0	0	0	0	0	0	2007	The Netherlands	Pig	ST398_25
SRR1303290_L001_R1_001	0	0	0	0	1	0	1	0	0	1	0	0	2009	The Netherlands	Human	ST398_24
SRR1303292_L001_R1_001	0	0	0	0	1	0	1	0	0	1	0	0	2007	The Netherlands	Pig	ST398_16
SRR1303298_L001_R1_001	0	0	0	0	0	0	0	0	0	0	0	0	2011	The Netherlands	Human	ST398_25
SRR1303299_L001_R1_001	0	0	0	0	1	0	1	0	0	1	0	0	2009	The Netherlands	Human	ST398_24
SRR1303300_L001_R1_001	0	0	0	1	0	0	0	0	0	1	0	0	2009	The Netherlands	Human	ST398_26
SRR1303303_L001_R1_001	0	0	0	0	0	0	0	0	0	0	0	0	2010	China	Rat	ST398_21
SRR1303304_L001_R1_001	0	0	0	0	1	0	1	0	0	1	0	0	2009	The Netherlands	Human	ST398_25
SRR1303305_L001_R1_001	0	0	0	0	1	0	1	0	0	1	0	0	2012	The Netherlands	Human	ST398_16
SRR1303385_L001_R1_001	0	0	0	1	0	0	0	0	0	1	0	0	2007	The Netherlands	Cattle	ST398_14
SRR1303391_L001_R1_001	0	0	0	0	0	0	0	0	0	0	0	0	2011	China	Rat	ST398_21
SRR1303399_L001_R1_001	0	0	0	0	0	0	0	0	0	0	0	0	2011	China	Poultry	ST398_18
SRR1303400_L001_R1_001	0	0	0	0	1	0	1	0	0	1	0	0	2008	The Netherlands	Human	ST398_5
SRR1303401_L001_R1_001	0	0	0	1	0	0	0	0	0	1	0	0	2008	The Netherlands	Human	ST398_26
SRR1303403_L001_R1_001	0	0	0	1	0	0	0	0	0	1	0	0	2011	The Netherlands	Human	ST398_26
SRR1303411_L001_R1_001	0	0	0	1	0	0	0	0	0	1	0	0	2008	The Netherlands	Rat	ST398_26
SRR1303413_L001_R1_001	0	0	0	0	1	0	1	0	0	1	0	0	2009	Germany	Poultry	ST398_23
SRR1303415_L001_R1_001	0	0	0	0	0	0	0	0	0	0	0	0	2008	The Netherlands	Human	ST398_20
SRR1303417_L001_R1_001	0	0	0	0	0	0	0	0	0	0	0	0	2009	China	Cat	ST398_18
SRR1303421_L001_R1_001	0	0	0	1	0	0	0	0	0	1	0	0	2008	The Netherlands	Human	ST398_26
SRR1303422_L001_R1_001	0	0	0	1	0	0	0	0	0	1	0	0	2009	The Netherlands	Human	ST398_24
SRR1303425_L001_R1_001	0	0	0	0	1	0	1	0	0	1	0	0	2011	The Netherlands	Human	ST398_25
SRR1303428_L001_R1_001	0	0	0	1	0	0	0	0	0	1	0	0	2011	The Netherlands	Human	ST398_26
SRR1303466_L001_R1_001	0	0	0	0	0	0	0	0	0	0	0	0	2009	China	Rat	ST398_21
SRR1303467_L001_R1_001	0	0	0	1	0	0	0	0	0	1	0	0	2009	The Netherlands	Human	ST398_26
SRR1303469_L001_R1_001	0	0	0	0	1	0	1	0	0	1	0	0	2009	The Netherlands	Human	ST398_22
SRR1303471_L001_R1_001	0	0	0	1	0	0	0	0	0	1	0	0	2011	The Netherlands	Human	ST398_26
SRR1303474_L001_R1_001	0	0	0	0	1	0	1	0	0	1	0	0	2009	Germany	Meleagris gallopavo	ST398_13
SRR1303477_L001_R1_001	0	0	0	1	0	0	0	0	0	1	0	0	2011	The Netherlands	Human	ST398_14
SRR1303478_L001_R1_001	0	0	0	0	0	0	0	0	0	0	0	0	2013	Trinidad and Tobago	Human	ST398_10
SRR1303479_L001_R1_001	0	0	0	1	0	0	0	0	0	1	0	0	2009	Germany	Meleagris gallopavo	ST398_26
SRR1303480_L001_R1_001	0	0	0	0	1	0	1	0	0	1	0	0	2009	Spain	Human	ST398_25
SRR1303482_L001_R1_001	0	0	0	1	0	0	0	0	0	1	0	0	2009	The Netherlands	Human	ST398_26
SRR1303487_L001_R1_001	0	0	0	0	1	0	1	0	0	1	0	0	2008	Spain	Pig	ST398_25
SRR1303491_L001_R1_001	0	0	0	0	1	0	1	0	0	1	0	0	2011	The Netherlands	Human	ST398_16
SRR1303492_L001_R1_001	0	0	0	0	1	0	1	0	0	1	0	0	2010	The Netherlands	Cattle	ST398_22
SRR1303494_L001_R1_001	0	0	0	1	0	0	0	0	0	1	0	0	2009	The Netherlands	Human	ST398_26
SRR1303497_L001_R1_001	0	0	0	0	0	0	0	0	0	0	0	0	2011	China	Cat	ST398_21
SRR1303498_L001_R1_001	0	0	0	0	0	0	0	0	0	0	0	0	2009	The Netherlands	Human	ST398_13
SRR1303499_L001_R1_001	0	0	0	1	0	0	0	0	0	1	0	0	2009	Germany	Meleagris gallopavo	ST398_26
SRR1303529_L001_R1_001	0	0	0	1	0	0	0	0	0	1	0	0	2009	Spain	Human	ST398_14
SRR1303532_L001_R1_001	0	0	0	0	1	0	1	0	0	1	0	0	2011	Spain	Human	ST398_25
SRR1303533_L001_R1_001	0	0	0	1	0	0	0	0	0	1	0	0	2010	The Netherlands	Human	ST398_26
SRR1303534_L001_R1_001	0	0	0	1	0	0	0	0	0	1	0	0	2009	Spain	Human	ST398_25
SRR1303537_L001_R1_001	0	0	0	1	0	0	0	0	0	1	0	0	2008	The Netherlands	Human	ST398_26
SRR1303538_L001_R1_001	0	0	0	0	1	0	1	0	0	1	0	0	2009	The Netherlands	Human	ST398_20
SRR1303539_L001_R1_001	0	0	0	0	1	0	1	0	0	1	0	0	2009	The Netherlands	Human	ST398_22
SRR1303542_L001_R1_001	0	0	0	1	0	0	0	0	0	1	0	0	2008	The Netherlands	Human	ST398_11
SRR1303552_L001_R1_001	0	0	0	0	0	0	0	0	0	0	0	0	2007	The Netherlands	Pig	ST398_20
SRR1303554_L001_R1_001	0	0	0	1	0	0	0	0	0	1	0	0	2009	Spain	Human	ST398_25
SRR1303556_L001_R1_001	0	0	0	0	1	0	1	0	0	1	0	0	2008	The Netherlands	Cattle	ST398_16
SRR1303557_L001_R1_001	0	0	0	0	0	0	0	0	0	0	0	0	2009	The Netherlands	Human	ST398_17
SRR1303559_L001_R1_001	0	0	0	0	1	0	1	0	0	1	0	0	2007	The Netherlands	Pig	ST398_7
SRR1303561_L001_R1_001	0	0	0	0	0	0	0	0	0	0	0	0	2007	The Netherlands	Pig	ST398_7
SRR1303563_L001_R1_001	0	0	0	1	0	0	0	0	0	1	0	0	2008	The Netherlands	Human	ST398_26
SRR1303564_L001_R1_001	0	0	0	1	0	0	0	0	0	1	0	0	2010	The Netherlands	Human	ST398_26
SRR1303565_L001_R1_001	0	0	0	0	0	0	0	0	0	0	0	0	2008	The Netherlands	Human	ST398_17
SRR1303569_L001_R1_001	0	0	0	1	0	0	0	0	0	1	0	0	2008	The Netherlands	Poultry	ST398_14
SRR1303570_L001_R1_001	0	0	0	1	0	0	0	0	0	1	0	0	2011	The Netherlands	Human	ST398_26
SRR1303571_L001_R1_001	0	0	0	1	0	0	0	0	0	1	0	0	2009	The Netherlands	Human	ST398_26
SRR1303572_L001_R1_001	0	0	0	0	0	0	0	0	0	0	0	0	2008	The Netherlands	Rat	ST398_25
SRR1303573_L001_R1_001	0	0	0	0	1	0	1	0	0	1	0	0	2011	The Netherlands	Human	ST398_8
SRR1303575_L001_R1_001	0	0	0	1	0	0	0	0	0	1	0	0	2009	The Netherlands	Human	ST398_26
SRR1303576_L001_R1_001	0	0	0	0	1	0	1	0	0	1	0	0	2009	Germany	Poultry	ST398_13
SRR1303577_L001_R1_001	0	0	0	0	0	0	0	0	0	0	0	0	2009	The Netherlands	Human	ST398_13
SRR1303578_L001_R1_001	0	0	0	0	1	0	1	0	0	1	0	0	2009	The Netherlands	Human	ST398_25
SRR1303579_L001_R1_001	0	0	0	0	1	0	1	0	0	1	0	0	2010	The Netherlands	Human	ST398_25
SRR1303582_L001_R1_001	0	0	0	1	0	0	0	0	0	1	0	0	2008	The Netherlands	Human	ST398_26
SRR1303585_L001_R1_001	0	0	0	1	0	0	0	0	0	1	0	0	2008	The Netherlands	Rat	ST398_26
SRR1303628_L001_R1_001	0	0	0	0	1	0	1	0	0	1	0	0	2009	Germany	Cattle	ST398_23
SRR1303630_L001_R1_001	0	0	0	0	1	0	1	0	0	1	0	0	2009	Spain	Human	ST398_25
SRR1303631_L001_R1_001	0	0	0	1	0	0	0	0	0	1	0	0	2010	The Netherlands	Cattle	ST398_26
SRR1303632_L001_R1_001	0	0	0	1	0	0	0	0	0	1	0	0	2011	The Netherlands	Human	ST398_26
SRR1303636_L001_R1_001	0	0	0	0	0	0	0	0	0	0	0	0	2011	The Netherlands	Human	ST398_17
SRR1303639_L001_R1_001	0	0	0	0	1	0	1	0	0	1	0	0	2009	The Netherlands	Human	ST398_23
SRR1307721_L001_R1_001	0	0	0	1	0	0	0	0	0	1	0	0	2009	The Netherlands	Human	ST398_26
SRR1326140_L001_R1_001	0	0	0	0	1	0	1	0	0	1	0	0	2008	The Netherlands	Human	ST398_25
SRR1326142_L001_R1_001	0	0	0	0	1	0	1	0	0	1	0	0	2008	The Netherlands	Human	ST398_23
SRR1326145_L001_R1_001	0	0	0	0	1	0	1	0	0	1	0	0	2009	The Netherlands	Human	ST398_8
SRR1326183_L001_R1_001	0	0	0	0	1	0	1	0	0	1	0	0	2009	The Netherlands	Human	ST398_25
SRR1326187_L001_R1_001	0	0	0	0	0	0	0	0	0	0	0	0	2009	The Netherlands	Human	ST398_17
SRR1326199_L001_R1_001	0	0	0	0	1	0	1	0	0	1	0	0	2008	The Netherlands	Human	ST398_8
SRR1326203_L001_R1_001	0	0	0	0	1	0	1	0	0	1	0	0	2009	The Netherlands	Human	ST398_8
SRR1326204_L001_R1_001	0	0	0	0	0	0	0	0	0	0	0	0	2009	The Netherlands	Human	ST398_13
SRR1326244_L001_R1_001	0	0	0	0	1	0	1	0	0	1	0	0	2008	The Netherlands	Human	ST398_25
SRR1326245_L001_R1_001	0	0	0	0	1	0	1	0	0	1	0	0	2008	The Netherlands	Human	ST398_7
SRR1326246_L001_R1_001	0	0	0	0	1	0	1	0	0	1	0	0	2008	The Netherlands	Human	ST398_5
SRR1326247_L001_R1_001	0	0	0	0	1	0	1	0	0	1	0	0	2009	The Netherlands	Human	ST398_13
SRR1326315_L001_R1_001	0	0	0	0	0	0	0	0	0	0	0	0	2009	The Netherlands	Human	ST398_17
SRR1326316_L001_R1_001	0	0	0	0	1	0	1	0	0	1	0	0	2011	The Netherlands	Human	ST398_23
SRR13267185_L001_R1_001	0	0	0	0	1	0	1	0	0	1	0	0	2016	Belgium	Pig	ST398_17
SRR13267186_L001_R1_001	0	0	0	0	1	0	1	0	0	1	0	0	2016	Belgium	Pig	ST398_17
SRR13267187_L001_R1_001	0	0	0	0	1	0	1	0	0	1	0	0	2016	Belgium	Pig	ST398_24
SRR13267189_L001_R1_001	0	0	0	0	1	0	1	0	0	1	0	0	2016	Belgium	Pig	ST398_24
SRR13267190_L001_R1_001	0	0	0	0	1	0	1	0	0	1	0	0	2016	Belgium	Pig	ST398_17
SRR13267191_L001_R1_001	0	0	0	0	1	0	1	0	0	1	0	0	2016	Belgium	Pig	ST398_23
SRR13267192_L001_R1_001	0	0	0	0	1	0	1	0	0	1	0	0	2016	Belgium	Pig	ST398_23
SRR13267193_L001_R1_001	0	0	0	0	1	0	1	0	0	1	0	0	2016	Belgium	Pig	ST398_13
SRR13267194_L001_R1_001	0	0	0	0	1	0	1	0	0	1	0	0	2016	Belgium	Pig	ST398_13
SRR13267195_L001_R1_001	0	0	0	1	0	0	0	0	0	1	0	0	2016	Belgium	Pig	ST398_26
SRR13267196_L001_R1_001	0	0	0	1	0	0	0	0	0	1	0	0	2016	Belgium	Pig	ST398_26
SRR13267197_L001_R1_001	0	0	0	0	1	0	1	0	0	1	0	0	2016	Belgium	Pig	ST398_23
SRR13267199_L001_R1_001	0	0	0	0	1	0	1	0	0	1	0	0	2016	Belgium	Pig	ST398_24
SRR13267200_L001_R1_001	0	0	0	0	1	0	1	0	0	1	0	0	2016	Belgium	Pig	ST398_23
SRR13267201_L001_R1_001	0	0	0	0	1	0	1	0	0	1	0	0	2016	Belgium	Pig	ST398_17
SRR13267202_L001_R1_001	0	0	0	0	1	0	1	0	0	1	0	0	2016	Belgium	Pig	ST398_24
SRR13267203_L001_R1_001	0	0	0	0	1	0	1	0	0	1	0	0	2016	Belgium	Pig	ST398_24
SRR13267204_L001_R1_001	0	0	0	1	0	0	0	0	0	1	0	0	2016	Belgium	Pig	ST398_26
SRR13267205_L001_R1_001	0	0	0	1	0	0	0	0	0	1	0	0	2016	Belgium	Pig	ST398_26
SRR13267206_L001_R1_001	0	0	0	0	1	0	1	0	0	1	0	0	2016	Belgium	Pig	ST398_23
SRR13267207_L001_R1_001	0	0	0	0	1	0	1	0	0	1	0	0	2016	Belgium	Pig	ST398_24
SRR13267208_L001_R1_001	0	0	0	0	1	0	1	0	0	1	0	0	2016	Belgium	Pig	ST398_23
SRR13267209_L001_R1_001	0	0	0	0	1	0	1	0	0	1	0	0	2016	Belgium	Pig	ST398_24
SRR13267210_L001_R1_001	0	0	0	0	1	0	1	0	0	1	0	0	2016	Belgium	Pig	ST398_24
SRR13267211_L001_R1_001	0	0	0	0	0	0	0	0	0	1	0	0	2016	Belgium	Pig	ST398_25
SRR13267212_L001_R1_001	0	0	0	0	1	0	1	0	0	1	0	0	2016	Belgium	Pig	ST398_24
SRR13267214_L001_R1_001	0	0	0	0	1	0	1	0	0	1	0	0	2016	Belgium	Pig	ST398_24
SRR13267215_L001_R1_001	0	0	0	0	1	0	1	0	0	1	0	0	2016	Belgium	Pig	ST398_24
SRR13267216_L001_R1_001	0	0	0	0	1	0	1	0	0	1	0	0	2016	Belgium	Pig	ST398_23
SRR13267217_L001_R1_001	0	0	0	0	1	0	1	0	0	1	0	0	2016	Belgium	Pig	ST398_25
SRR13267219_L001_R1_001	0	0	0	0	1	0	1	0	0	1	0	0	2016	Belgium	Pig	ST398_20
SRR13267220_L001_R1_001	0	0	0	1	0	0	0	0	0	1	0	0	2016	Belgium	Pig	ST398_26
SRR13267221_L001_R1_001	0	0	0	0	1	0	1	0	0	1	0	0	2016	Belgium	Pig	ST398_23
SRR13267222_L001_R1_001	0	0	0	0	1	0	1	0	0	1	0	0	2016	Belgium	Pig	ST398_24
SRR13267223_L001_R1_001	0	0	0	0	1	0	1	0	0	1	0	0	2016	Belgium	Pig	ST398_12
SRR13267224_L001_R1_001	0	0	0	1	0	0	0	0	0	1	0	0	2016	Belgium	Pig	ST398_26
SRR1326938_L001_R1_001	0	0	0	0	1	0	1	0	0	1	0	0	2008	The Netherlands	Human	ST398_7
SRR1326939_L001_R1_001	0	0	0	0	1	0	1	0	0	1	0	0	2008	The Netherlands	Human	ST398_25
SRR1326940_L001_R1_001	0	0	0	0	1	0	1	0	0	1	0	0	2009	The Netherlands	Human	ST398_8
SRR1326943_L001_R1_001	0	0	0	0	1	0	1	0	0	1	0	0	2008	The Netherlands	Human	ST398_8
SRR1326944_L001_R1_001	0	0	0	0	1	0	1	0	0	1	0	0	2009	The Netherlands	Human	ST398_23
SRR1326945_L001_R1_001	0	0	0	1	0	0	0	0	0	1	0	0	2011	The Netherlands	Human	ST398_26
SRR1326947_L001_R1_001	0	0	0	0	1	0	1	0	0	1	0	0	2008	The Netherlands	Human	ST398_25
SRR1326948_L001_R1_001	0	0	0	0	0	0	0	0	0	0	0	0	2009	The Netherlands	Human	ST398_8
SRR1326949_L001_R1_001	0	0	0	0	1	0	1	0	0	1	0	0	2009	The Netherlands	Human	ST398_6
SRR1326950_L001_R1_001	0	0	0	1	0	0	0	0	0	1	0	0	2011	The Netherlands	Human	ST398_26
SRR1326951_L001_R1_001	0	0	0	0	1	0	1	0	0	1	0	0	2008	The Netherlands	Human	ST398_6
SRR1326954_L001_R1_001	0	0	0	1	0	0	0	0	0	1	0	0	2008	The Netherlands	Human	ST398_26
SRR1326955_L001_R1_001	0	0	0	0	1	0	1	0	0	1	0	0	2009	The Netherlands	Human	ST398_25
SRR1326956_L001_R1_001	0	0	0	0	0	0	0	0	0	0	0	0	2009	The Netherlands	Human	ST398_20
SRR1326957_L001_R1_001	0	0	0	0	1	0	1	0	0	1	0	0	2009	The Netherlands	Human	ST398_20
SRR1326958_L001_R1_001	0	0	0	0	1	0	1	0	0	1	0	0	2011	The Netherlands	Human	ST398_25
SRR1326959_L001_R1_001	0	0	0	0	1	0	1	0	0	1	0	0	2008	The Netherlands	Human	ST398_25
SRR1326960_L001_R1_001	0	0	0	0	1	0	1	0	0	1	0	0	2008	The Netherlands	Human	ST398_22
SRR1326964_L001_R1_001	0	0	0	0	1	0	1	0	0	1	0	0	2009	The Netherlands	Human	ST398_7
SRR1326965_L001_R1_001	0	0	0	1	0	0	0	0	0	1	0	0	2011	The Netherlands	Human	ST398_26
SRR1326966_L001_R1_001	0	0	0	0	1	0	1	0	0	1	0	0	2008	The Netherlands	Human	ST398_25
SRR1326967_L001_R1_001	0	0	0	0	1	0	1	0	0	1	0	0	2009	The Netherlands	Human	ST398_23
SRR1326968_L001_R1_001	0	0	0	1	0	0	0	0	0	1	0	0	2009	The Netherlands	Human	ST398_26
SRR1326969_L001_R1_001	0	0	0	0	0	0	0	0	0	1	0	0	2008	The Netherlands	Human	ST398_7
SRR1326970_L001_R1_001	0	0	0	1	0	0	0	0	0	1	0	0	2008	The Netherlands	Human	ST398_26
SRR1326971_L001_R1_001	0	0	0	0	0	0	0	0	0	1	0	0	2008	The Netherlands	Human	ST398_15
SRR1326972_L001_R1_001	0	0	0	0	0	0	0	0	0	0	0	0	2008	The Netherlands	Human	ST398_20
SRR1326973_L001_R1_001	0	0	0	0	0	0	0	0	0	0	0	0	2009	The Netherlands	Human	ST398_8
SRR1326975_L001_R1_001	0	0	0	0	1	0	1	0	0	1	0	0	2009	The Netherlands	Human	ST398_24
SRR1326976_L001_R1_001	0	0	0	0	1	0	1	0	0	1	0	0	2009	The Netherlands	Human	ST398_7
SRR1326977_L001_R1_001	0	0	0	0	0	0	0	0	0	0	0	0	2009	The Netherlands	Human	ST398_23
SRR1326979_L001_R1_001	0	0	0	0	1	0	1	0	0	1	0	0	2008	The Netherlands	Human	ST398_8
SRR1326980_L001_R1_001	0	0	0	0	1	0	1	0	0	1	0	0	2008	The Netherlands	Human	ST398_8
SRR1326981_L001_R1_001	0	0	0	1	0	0	0	0	0	1	0	0	2008	The Netherlands	Human	ST398_26
SRR1326982_L001_R1_001	0	0	0	0	1	0	1	0	0	1	0	0	2009	The Netherlands	Human	ST398_13
SRR1326983_L001_R1_001	0	0	0	0	1	0	1	0	0	1	0	0	2008	The Netherlands	Human	ST398_7
SRR1326985_L001_R1_001	0	0	0	0	0	0	0	0	0	0	0	0	2009	The Netherlands	Human	ST398_20
SRR1326986_L001_R1_001	0	0	0	0	0	0	0	0	0	0	0	0	2011	The Netherlands	Human	ST398_20
SRR1326987_L001_R1_001	0	0	0	0	1	0	1	0	0	1	0	0	2008	The Netherlands	Human	ST398_5
SRR1326988_L001_R1_001	0	0	0	0	1	0	1	0	0	1	0	0	2008	The Netherlands	Human	ST398_24
SRR1326989_L001_R1_001	0	0	0	0	1	0	1	0	0	1	0	0	2009	The Netherlands	Human	ST398_7
SRR1326990_L001_R1_001	0	0	0	0	0	0	0	0	0	0	0	0	2009	The Netherlands	Human	ST398_20
SRR1326991_L001_R1_001	0	0	0	0	1	0	1	0	0	1	0	0	2011	The Netherlands	Human	ST398_25
SRR1326992_L001_R1_001	0	0	0	1	0	0	0	0	0	1	0	0	2011	The Netherlands	Human	ST398_26
SRR1326993_L001_R1_001	0	0	0	0	0	0	0	0	0	0	0	0	2009	The Netherlands	Human	ST398_17
SRR1326994_L001_R1_001	0	0	0	0	1	0	1	0	0	1	0	0	2008	The Netherlands	Human	ST398_6
SRR1326995_L001_R1_001	0	0	0	0	0	0	0	0	0	0	0	0	2008	The Netherlands	Human	ST398_25
SRR1326996_L001_R1_001	0	0	0	1	0	0	0	0	0	1	0	0	2011	The Netherlands	Human	ST398_26
SRR1326997_L001_R1_001	0	0	0	1	0	0	0	0	0	1	0	0	2009	The Netherlands	Human	ST398_26
SRR1328170_L001_R1_001	0	0	0	0	1	0	1	0	0	1	0	0	2008	The Netherlands	Human	ST398_25
SRR1328172_L001_R1_001	0	0	0	0	0	0	0	0	0	0	0	0	2008	The Netherlands	Human	ST398_20
SRR1328174_L001_R1_001	0	0	0	1	0	0	0	0	0	1	0	0	2008	The Netherlands	Human	ST398_26
SRR1328175_L001_R1_001	0	0	0	0	1	0	1	0	0	1	0	0	2009	The Netherlands	Human	ST398_25
SRR1328176_L001_R1_001	0	0	0	0	1	0	1	0	0	1	0	0	2008	The Netherlands	Human	ST398_6
SRR1328177_L001_R1_001	0	0	0	0	1	0	1	0	0	1	0	0	2008	The Netherlands	Human	ST398_22
SRR1328178_L001_R1_001	0	0	0	1	0	0	0	0	0	1	0	0	2008	The Netherlands	Human	ST398_26
SRR1328180_L001_R1_001	0	0	0	0	1	0	1	0	0	1	0	0	2011	The Netherlands	Human	ST398_25
SRR1328181_L001_R1_001	0	0	0	1	0	0	0	0	0	1	0	0	2009	The Netherlands	Human	ST398_26
SRR1328183_L001_R1_001	0	0	0	0	1	0	1	0	0	1	0	0	2008	The Netherlands	Human	ST398_25
SRR1328184_L001_R1_001	0	0	0	1	0	0	0	0	0	1	0	0	2009	The Netherlands	Human	ST398_26
SRR1328185_L001_R1_001	0	0	0	1	0	0	0	0	0	1	0	0	2011	The Netherlands	Human	ST398_26
SRR1328186_L001_R1_001	0	0	0	0	1	0	1	0	0	1	0	0	2008	The Netherlands	Human	ST398_25
SRR1328188_L001_R1_001	0	0	0	0	1	0	1	0	0	1	0	0	2008	The Netherlands	Human	ST398_24
SRR1328189_L001_R1_001	0	0	0	0	0	0	0	0	0	1	0	0	2011	The Netherlands	Human	ST398_16
SRR1328190_L001_R1_001	0	0	0	0	1	0	1	0	0	1	0	0	2011	The Netherlands	Human	ST398_4
SRR1328192_L001_R1_001	0	0	0	0	1	0	1	0	0	1	0	0	2008	The Netherlands	Human	ST398_8
SRR1328273_L001_R1_001	0	0	0	0	1	0	1	0	0	1	0	0	2008	The Netherlands	Human	ST398_25
SRR1328274_L001_R1_001	0	0	0	1	0	0	0	0	0	1	0	0	2009	The Netherlands	Human	ST398_26
SRR1328275_L001_R1_001	0	0	0	0	1	0	1	0	0	1	0	0	2008	The Netherlands	Human	ST398_25
SRR1328276_L001_R1_001	0	0	0	0	1	0	1	0	0	1	0	0	2008	The Netherlands	Human	ST398_22
SRR1328277_L001_R1_001	0	0	0	0	1	0	1	0	0	1	0	0	2009	The Netherlands	Human	ST398_22
SRR1328278_L001_R1_001	0	0	0	0	0	0	0	0	0	0	0	0	2009	The Netherlands	Human	ST398_17
SRR1328287_L001_R1_001	0	0	0	1	0	0	0	0	0	1	0	0	2008	The Netherlands	Human	ST398_26
SRR1328289_L001_R1_001	0	0	0	1	0	0	0	0	0	1	0	0	2009	The Netherlands	Human	ST398_26
SRR1328291_L001_R1_001	0	0	0	0	1	0	1	0	0	1	0	0	2008	The Netherlands	Human	ST398_25
SRR1328293_L001_R1_001	0	0	0	0	1	0	1	0	0	1	0	0	2008	The Netherlands	Human	ST398_8
SRR1328295_L001_R1_001	0	0	0	0	1	0	1	0	0	1	0	0	2008	The Netherlands	Human	ST398_23
SRR1328296_L001_R1_001	0	0	0	0	1	0	1	0	0	1	0	0	2008	The Netherlands	Human	ST398_25
SRR1328297_L001_R1_001	0	0	0	1	0	0	0	0	0	1	0	0	2008	The Netherlands	Human	ST398_26
SRR1328299_L001_R1_001	0	0	0	0	1	0	1	0	0	1	0	0	2008	The Netherlands	Human	ST398_8
SRR1328300_L001_R1_001	0	0	0	1	0	0	0	0	0	1	0	0	2011	The Netherlands	Human	ST398_26
SRR1328301_L001_R1_001	0	0	0	0	1	0	1	0	0	1	0	0	2008	The Netherlands	Human	ST398_8
SRR1328302_L001_R1_001	0	0	0	0	1	0	1	0	0	1	0	0	2008	The Netherlands	Human	ST398_5
SRR1328305_L001_R1_001	0	0	0	0	1	0	1	0	0	1	0	0	2009	The Netherlands	Human	ST398_7
SRR1328306_L001_R1_001	0	0	0	0	1	0	1	0	0	1	0	0	2011	The Netherlands	Human	ST398_6
SRR1328307_L001_R1_001	0	0	0	0	1	0	1	0	0	1	0	0	2008	The Netherlands	Human	ST398_23
SRR1328308_L001_R1_001	0	0	0	1	0	0	0	0	0	1	0	0	2008	The Netherlands	Human	ST398_26
SRR1328309_L001_R1_001	0	0	0	0	1	0	1	0	0	1	0	0	2008	The Netherlands	Human	ST398_8
SRR1328311_L001_R1_001	0	0	0	0	1	0	1	0	0	1	0	0	2008	The Netherlands	Human	ST398_25
SRR1328313_L001_R1_001	0	0	0	0	1	0	1	0	0	1	0	0	2008	The Netherlands	Human	ST398_8
SRR1328314_L001_R1_001	0	0	0	0	1	0	1	0	0	1	0	0	2008	The Netherlands	Human	ST398_5
SRR1328316_L001_R1_001	0	0	0	0	1	0	1	0	0	1	0	0	2009	The Netherlands	Human	ST398_6
SRR1328318_L001_R1_001	0	0	0	1	0	0	0	0	0	1	0	0	2009	The Netherlands	Human	ST398_26
SRR1328320_L001_R1_001	0	0	0	0	1	0	1	0	0	1	0	0	2009	The Netherlands	Human	ST398_22
SRR1328325_L001_R1_001	0	0	0	0	1	0	1	0	0	1	0	0	2008	The Netherlands	Human	ST398_23
SRR1328326_L001_R1_001	0	0	0	0	1	0	1	0	0	1	0	0	2008	The Netherlands	Human	ST398_20
SRR1328327_L001_R1_001	0	0	0	0	0	0	0	0	0	0	0	0	2009	The Netherlands	Human	ST398_17
SRR1328329_L001_R1_001	0	0	0	0	1	0	1	0	0	1	0	0	2008	The Netherlands	Human	ST398_24
SRR1328330_L001_R1_001	0	0	0	0	1	0	1	0	0	1	0	0	2008	The Netherlands	Human	ST398_8
SRR1328331_L001_R1_001	0	0	0	0	1	0	1	0	0	1	0	0	2009	The Netherlands	Human	ST398_8
SRR1328332_L001_R1_001	0	0	0	0	1	0	1	0	0	1	0	0	2008	The Netherlands	Human	ST398_7
SRR1328333_L001_R1_001	0	0	0	0	1	0	1	0	0	1	0	0	2009	The Netherlands	Human	ST398_6
SRR1329223_L001_R1_001	0	0	0	0	1	0	1	0	0	1	0	0	2009	The Netherlands	Human	ST398_22
SRR1329225_L001_R1_001	0	0	0	0	0	0	0	0	0	0	0	0	2009	The Netherlands	Human	ST398_20
SRR1329227_L001_R1_001	0	0	0	0	0	0	0	0	0	0	0	0	2009	The Netherlands	Human	ST398_8
SRR1329228_L001_R1_001	0	0	0	0	1	0	1	0	0	1	0	0	2011	The Netherlands	Human	ST398_15
SRR1329229_L001_R1_001	0	0	0	0	1	0	1	0	0	1	0	0	2009	The Netherlands	Human	ST398_8
SRR1329230_L001_R1_001	0	0	0	1	0	0	0	0	0	1	0	0	2009	The Netherlands	Human	ST398_26
SRR1329231_L001_R1_001	0	0	0	0	1	0	1	0	0	1	0	0	2008	The Netherlands	Human	ST398_7
SRR1329233_L001_R1_001	0	0	0	0	0	0	0	0	0	1	0	0	2008	The Netherlands	Human	ST398_7
SRR1329235_L001_R1_001	0	0	0	1	0	0	0	0	0	1	0	0	2009	The Netherlands	Human	ST398_26
SRR1329236_L001_R1_001	0	0	0	0	1	0	1	0	0	1	0	0	2011	The Netherlands	Human	ST398_25
SRR1329237_L001_R1_001	0	0	0	0	1	0	1	0	0	1	0	0	2008	The Netherlands	Human	ST398_22
SRR1329238_L001_R1_001	0	0	0	0	1	0	1	0	0	1	0	0	2009	The Netherlands	Human	ST398_4
SRR1329240_L001_R1_001	0	0	0	0	1	0	1	0	0	1	0	0	2008	The Netherlands	Human	ST398_25
SRR1329241_L001_R1_001	0	0	0	0	1	0	1	0	0	1	0	0	2011	The Netherlands	Human	ST398_25
SRR1329242_L001_R1_001	0	0	0	0	1	0	1	0	0	1	0	0	2008	The Netherlands	Human	ST398_25
SRR1329244_L001_R1_001	0	0	0	0	1	0	1	0	0	1	0	0	2009	The Netherlands	Human	ST398_7
SRR1329245_L001_R1_001	0	0	0	0	1	0	1	0	0	1	0	0	2009	The Netherlands	Human	ST398_22
SRR1329246_L001_R1_001	0	0	0	1	0	0	0	0	0	1	0	0	2008	The Netherlands	Human	ST398_26
SRR1329258_L001_R1_001	0	0	0	0	1	0	1	0	0	1	0	0	2009	The Netherlands	Human	ST398_22
SRR1329259_L001_R1_001	0	0	0	1	0	0	0	0	0	1	0	0	2011	The Netherlands	Human	ST398_11
SRR1329260_L001_R1_001	0	0	0	0	1	0	1	0	0	1	0	0	2011	The Netherlands	Human	ST398_8
SRR1329261_L001_R1_001	0	0	0	0	1	0	1	0	0	1	0	0	2009	The Netherlands	Human	ST398_8
SRR1329263_L001_R1_001	0	0	0	0	1	0	1	0	0	1	0	0	2008	The Netherlands	Human	ST398_8
SRR1329264_L001_R1_001	0	0	0	1	0	0	0	0	0	1	0	0	2009	The Netherlands	Human	ST398_26
SRR1329266_L001_R1_001	0	0	0	0	1	0	1	0	0	1	0	0	2008	The Netherlands	Human	ST398_5
SRR1329267_L001_R1_001	0	0	0	0	1	0	1	0	0	1	0	0	2008	The Netherlands	Human	ST398_15
SRR1329268_L001_R1_001	0	0	0	0	1	0	1	0	0	1	0	0	2009	The Netherlands	Human	ST398_5
SRR1329269_L001_R1_001	0	0	0	0	0	0	0	0	0	0	0	0	2011	The Netherlands	Human	ST398_25
SRR1329271_L001_R1_001	0	0	0	0	1	0	1	0	0	1	0	0	2009	The Netherlands	Human	ST398_22
SRR1329272_L001_R1_001	0	0	0	0	1	0	1	0	0	1	0	0	2009	The Netherlands	Human	ST398_5
SRR1329273_L001_R1_001	0	0	0	0	0	0	0	0	0	0	0	0	2009	The Netherlands	Human	ST398_13
SRR1329274_L001_R1_001	0	0	0	0	1	0	1	0	0	1	0	0	2008	The Netherlands	Human	ST398_8
SRR1329276_L001_R1_001	0	0	0	1	0	0	0	0	0	1	0	0	2008	The Netherlands	Human	ST398_26
SRR1329277_L001_R1_001	0	0	0	0	0	0	0	0	0	0	0	0	2009	The Netherlands	Human	ST398_20
SRR1329278_L001_R1_001	0	0	0	1	0	0	0	0	0	1	0	0	2008	The Netherlands	Human	ST398_26
SRR1329279_L001_R1_001	0	0	0	0	1	0	1	0	0	1	0	0	2008	The Netherlands	Human	ST398_25
SRR1329280_L001_R1_001	0	0	0	0	1	0	1	0	0	1	0	0	2009	The Netherlands	Human	ST398_8
SRR1329281_L001_R1_001	0	0	0	0	0	0	0	0	0	0	0	0	2008	The Netherlands	Human	ST398_17
SRR1329282_L001_R1_001	0	0	0	0	1	0	1	0	0	1	0	0	2011	The Netherlands	Human	ST398_15
SRR1329283_L001_R1_001	0	0	0	0	1	0	1	0	0	1	0	0	2009	The Netherlands	Human	ST398_23
SRR1329286_L001_R1_001	0	0	0	0	0	0	0	0	0	0	0	0	2009	The Netherlands	Human	ST398_13
SRR1329289_L001_R1_001	0	0	0	1	0	0	0	0	0	1	0	0	2011	The Netherlands	Human	ST398_26
SRR1329290_L001_R1_001	0	0	0	0	1	0	1	0	0	1	0	0	2011	The Netherlands	Human	ST398_8
SRR1329291_L001_R1_001	0	0	0	1	0	0	0	0	0	1	0	0	2008	The Netherlands	Human	ST398_26
SRR1329293_L001_R1_001	0	0	0	1	0	0	0	0	0	1	0	0	2011	The Netherlands	Human	ST398_26
SRR1329296_L001_R1_001	0	0	0	0	1	0	1	0	0	1	0	0	2011	The Netherlands	Human	ST398_22
SRR1329298_L001_R1_001	0	0	0	0	1	0	1	0	0	1	0	0	2008	The Netherlands	Human	ST398_7
SRR1329300_L001_R1_001	0	0	0	0	0	0	0	0	0	1	0	0	2011	The Netherlands	Human	ST398_15
SRR1329301_L001_R1_001	0	0	0	0	1	0	1	0	0	1	0	0	2008	The Netherlands	Human	ST398_23
SRR1329302_L001_R1_001	0	0	0	0	1	0	1	0	0	1	0	0	2008	The Netherlands	Human	ST398_25
SRR1329303_L001_R1_001	0	0	0	0	1	0	1	0	0	1	0	0	2008	The Netherlands	Human	ST398_6
SRR1329305_L001_R1_001	0	0	0	0	1	0	1	0	0	1	0	0	2011	The Netherlands	Human	ST398_23
SRR1329306_L001_R1_001	0	0	0	0	1	0	1	0	0	1	0	0	2008	The Netherlands	Human	ST398_8
SRR1329308_L001_R1_001	0	0	0	0	0	0	0	0	0	0	0	0	2009	The Netherlands	Human	ST398_13
SRR1329310_L001_R1_001	0	0	0	1	0	0	0	0	0	1	0	0	2008	The Netherlands	Human	ST398_26
SRR1329311_L001_R1_001	0	0	0	0	1	0	1	0	0	1	0	0	2009	The Netherlands	Human	ST398_8
SRR1329812_L001_R1_001	0	0	0	0	1	0	1	0	0	1	0	0	2008	The Netherlands	Human	ST398_8
SRR1329834_L001_R1_001	0	0	0	0	1	0	1	0	0	1	0	0	2008	The Netherlands	Human	ST398_6
SRR1329839_L001_R1_001	0	0	0	0	1	0	1	0	0	1	0	0	2008	The Netherlands	Human	ST398_23
SRR1329850_L001_R1_001	0	0	0	0	1	0	1	0	0	1	0	0	2011	The Netherlands	Human	ST398_16
SRR1330202_L001_R1_001	0	0	0	0	1	0	1	0	0	1	0	0	2011	The Netherlands	Human	ST398_15
SRR1330204_L001_R1_001	0	0	0	0	1	0	1	0	0	1	0	0	2008	The Netherlands	Human	ST398_4
SRR1330205_L001_R1_001	0	0	0	0	1	0	1	0	0	1	0	0	2008	The Netherlands	Human	ST398_5
SRR1330206_L001_R1_001	0	0	0	0	0	0	0	0	0	0	0	0	2009	The Netherlands	Human	ST398_20
SRR1330208_L001_R1_001	0	0	0	1	0	0	0	0	0	1	0	0	2009	The Netherlands	Human	ST398_11
SRR1330212_L001_R1_001	0	0	0	0	1	0	1	0	0	1	0	0	2008	The Netherlands	Human	ST398_25
SRR1330215_L001_R1_001	0	0	0	1	0	0	0	0	0	1	0	0	2011	The Netherlands	Human	ST398_26
SRR1330216_L001_R1_001	0	0	0	1	0	0	0	0	0	1	0	0	2011	The Netherlands	Human	ST398_26
SRR1330217_L001_R1_001	0	0	0	0	0	0	0	0	0	0	0	0	2009	The Netherlands	Human	ST398_20
SRR1330218_L001_R1_001	0	0	0	0	1	0	1	0	0	1	0	0	2008	The Netherlands	Human	ST398_23
SRR1330219_L001_R1_001	0	0	0	0	1	0	1	0	0	1	0	0	2008	The Netherlands	Human	ST398_8
SRR1330220_L001_R1_001	0	0	0	0	0	0	0	0	0	0	0	0	2009	The Netherlands	Human	ST398_20
SRR1330223_L001_R1_001	0	0	0	0	0	0	0	0	0	0	0	0	2009	The Netherlands	Human	ST398_17
SRR1330224_L001_R1_001	0	0	0	1	0	0	0	0	0	1	0	0	2008	The Netherlands	Human	ST398_26
SRR1330225_L001_R1_001	0	0	0	0	1	0	1	0	0	1	0	0	2008	The Netherlands	Human	ST398_20
SRR1330229_L001_R1_001	0	0	0	0	1	0	1	0	0	1	0	0	2008	The Netherlands	Human	ST398_8
SRR1330231_L001_R1_001	0	0	0	0	0	0	0	0	0	0	0	0	2008	The Netherlands	Human	ST398_23
SRR1330232_L001_R1_001	0	0	0	1	0	0	0	0	0	1	0	0	2011	The Netherlands	Human	ST398_26
SRR1330233_L001_R1_001	0	0	0	0	1	0	1	0	0	1	0	0	2008	The Netherlands	Human	ST398_8
SRR1330234_L001_R1_001	0	0	0	0	1	0	1	0	0	1	0	0	2008	The Netherlands	Human	ST398_25
SRR1330238_L001_R1_001	0	0	0	0	1	0	1	0	0	1	0	0	2011	The Netherlands	Human	ST398_13
SRR1330239_L001_R1_001	0	0	0	0	1	0	1	0	0	1	0	0	2011	The Netherlands	Human	ST398_24
SRR1330243_L001_R1_001	0	0	0	1	0	0	0	0	0	1	0	0	2011	The Netherlands	Human	ST398_26
SRR1330244_L001_R1_001	0	0	0	1	0	0	0	0	0	1	0	0	2011	The Netherlands	Human	ST398_26
SRR1330248_L001_R1_001	0	0	0	0	0	0	0	0	0	0	0	0	2011	The Netherlands	Human	ST398_17
SRR1330249_L001_R1_001	0	0	0	0	0	0	0	0	0	0	0	0	2008	The Netherlands	Human	ST398_17
SRR1330253_L001_R1_001	0	0	0	0	0	0	0	0	0	0	0	0	2009	The Netherlands	Human	ST398_20
SRR1330254_L001_R1_001	0	0	0	0	1	0	1	0	0	1	0	0	2011	The Netherlands	Human	ST398_25
SRR1330259_L001_R1_001	0	0	0	0	1	0	1	0	0	1	0	0	2011	The Netherlands	Human	ST398_25
SRR1330260_L001_R1_001	0	0	0	0	1	0	1	0	0	1	0	0	2009	The Netherlands	Human	ST398_25
SRR1330264_L001_R1_001	0	0	0	0	1	0	1	0	0	1	0	0	2009	The Netherlands	Human	ST398_6
SRR1330267_L001_R1_001	0	0	0	1	0	0	0	0	0	1	0	0	2008	The Netherlands	Human	ST398_26
SRR1330269_L001_R1_001	0	0	0	0	1	0	1	0	0	1	0	0	2008	The Netherlands	Human	ST398_6
SRR1330271_L001_R1_001	0	0	0	1	0	0	0	0	0	1	0	0	2011	The Netherlands	Human	ST398_24
SRR1330274_L001_R1_001	0	0	0	0	1	0	1	0	0	1	0	0	2008	The Netherlands	Human	ST398_25
SRR1330275_L001_R1_001	0	0	0	1	0	0	0	0	0	1	0	0	2008	The Netherlands	Human	ST398_26
SRR1330280_L001_R1_001	0	0	0	0	1	0	1	0	0	1	0	0	2008	The Netherlands	Human	ST398_8
SRR1330281_L001_R1_001	0	0	0	0	1	0	1	0	0	1	0	0	2008	The Netherlands	Human	ST398_22
SRR1330282_L001_R1_001	0	0	0	0	0	0	0	0	0	0	0	0	2008	The Netherlands	Human	ST398_17
SRR1330370_L001_R1_001	0	0	0	0	1	0	1	0	0	1	0	0	2008	The Netherlands	Human	ST398_5
SRR1330395_L001_R1_001	0	0	0	0	1	0	1	0	0	1	0	0	2009	The Netherlands	Human	ST398_22
SRR1330398_L001_R1_001	0	0	0	1	0	0	0	0	0	1	0	0	2011	The Netherlands	Human	ST398_26
SRR1330401_L001_R1_001	0	0	0	0	0	0	0	0	0	0	0	0	2011	The Netherlands	Human	ST398_17
SRR1330404_L001_R1_001	0	0	0	0	1	0	1	0	0	1	0	0	2008	The Netherlands	Human	ST398_25
SRR1330408_L001_R1_001	0	0	0	1	0	0	0	0	0	1	0	0	2008	The Netherlands	Human	ST398_26
SRR1330409_L001_R1_001	0	0	0	0	1	0	1	0	0	1	0	0	2008	The Netherlands	Human	ST398_22
SRR1330410_L001_R1_001	0	0	0	0	1	0	1	0	0	1	0	0	2011	The Netherlands	Human	ST398_23
SRR1330414_L001_R1_001	0	0	0	1	0	0	0	0	0	1	0	0	2008	The Netherlands	Human	ST398_26
SRR1330416_L001_R1_001	0	0	0	0	1	0	1	0	0	1	0	0	2009	The Netherlands	Human	ST398_5
SRR1330418_L001_R1_001	0	0	0	0	0	0	0	0	0	0	0	0	2008	The Netherlands	Human	ST398_23
SRR1330419_L001_R1_001	0	0	0	1	0	0	0	0	0	1	0	0	2008	The Netherlands	Human	ST398_26
SRR1330422_L001_R1_001	0	0	0	1	0	0	0	0	0	1	0	0	2011	The Netherlands	Human	ST398_24
SRR1330424_L001_R1_001	0	0	0	0	1	0	1	0	0	1	0	0	2011	The Netherlands	Human	ST398_6
SRR1330426_L001_R1_001	0	0	0	0	1	0	1	0	0	1	0	0	2011	The Netherlands	Human	ST398_6
SRR1342117_L001_R1_001	0	0	0	0	1	0	1	0	0	1	0	0	2011	The Netherlands	Human	ST398_23
SRR1342123_L001_R1_001	0	0	0	1	0	0	0	0	0	1	0	0	2009	The Netherlands	Human	ST398_26
SRR1342131_L001_R1_001	0	0	0	1	0	0	0	0	0	1	0	0	2011	The Netherlands	Human	ST398_26
SRR1342147_L001_R1_001	0	0	0	1	0	0	0	0	0	1	0	0	2008	The Netherlands	Human	ST398_26
SRR1342149_L001_R1_001	0	0	0	0	0	0	0	0	0	0	0	0	2009	The Netherlands	Human	ST398_20
SRR1342151_L001_R1_001	0	0	0	0	1	0	1	0	0	1	0	0	2008	The Netherlands	Human	ST398_20
SRR1342166_L001_R1_001	0	0	0	1	0	0	0	0	0	1	0	0	2009	The Netherlands	Human	ST398_26
SRR1342173_L001_R1_001	0	0	0	1	0	0	0	0	0	1	0	0	2008	The Netherlands	Human	ST398_26
SRR1342174_L001_R1_001	0	0	0	0	1	0	1	0	0	1	0	0	2009	The Netherlands	Human	ST398_8
SRR1342181_L001_R1_001	0	0	0	0	1	0	1	0	0	1	0	0	2009	The Netherlands	Human	ST398_23
SRR1344692_L001_R1_001	0	0	0	0	1	0	1	0	0	1	0	0	2008	The Netherlands	Human	ST398_6
SRR1530980_L001_R1_001	0	0	0	0	1	0	1	0	0	1	0	0	2008	The Netherlands	Human	ST398_25
SRR15903537_L001_R1_001	0	0	0	0	0	0	0	0	0	0	0	0	2019	France	Cat	ST398_9
SRR15903538_L001_R1_001	0	0	0	0	0	0	0	0	0	0	0	0	2019	France	Cat	ST398_9
SRR15903539_L001_R1_001	0	0	0	0	0	0	0	0	0	0	0	0	2019	France	Cattle	ST398_10
SRR15903541_L001_R1_001	0	0	0	0	0	0	0	0	0	0	0	0	2019	France	Cattle	ST398_10
SRR15903544_L001_R1_001	0	0	0	1	0	0	0	0	0	1	0	0	2017	France	Dog	ST398_26
SRR15903547_L001_R1_001	0	0	0	0	0	0	0	0	0	0	0	0	2018	France	Dog	ST398_10
SRR15903550_L001_R1_001	0	0	0	0	0	0	0	0	0	0	0	0	2018	France	Cat	ST398_10
SRR15903551_L001_R1_001	0	0	0	0	0	0	0	0	0	0	0	0	2018	France	Dog	ST398_9
SRR15903552_L001_R1_001	0	0	0	0	0	0	0	0	0	0	0	0	2018	France	Bird	ST398_10
SRR15903553_L001_R1_001	0	0	0	0	0	0	0	0	0	0	0	0	2017	France	Dog	ST398_9
SRR15903554_L001_R1_001	0	0	0	0	0	0	0	0	0	0	0	0	2017	France	Dog	ST398_9
SRR15903555_L001_R1_001	0	0	0	1	0	0	0	0	0	1	0	0	2018	France	Cattle	ST398_14
SRR15903556_L001_R1_001	0	0	0	0	0	0	0	0	0	0	0	0	2018	France	Goat	ST398_10
SRR15903557_L001_R1_001	0	0	0	0	0	0	0	0	0	0	0	0	2019	France	Cat	ST398_9
SRR15903558_L001_R1_001	0	0	0	0	0	0	0	0	0	0	0	0	2019	France	Cat	ST398_9
SRR15903559_L001_R1_001	0	0	0	0	0	0	0	0	0	0	0	0	2019	France	Dog	ST398_9
SRR15903560_L001_R1_001	0	0	0	0	0	0	0	0	0	0	0	0	2019	France	Cat	ST398_9
SRR15903561_L001_R1_001	0	0	0	0	0	0	0	0	0	0	0	0	2017	France	Dog	ST398_10
SRR15903562_L001_R1_001	0	0	0	0	0	0	0	0	0	0	0	0	2019	France	Cat	ST398_9
SRR15903563_L001_R1_001	0	0	0	0	0	0	0	0	0	0	0	0	2016	France	Cat	ST398_9
SRR15903564_L001_R1_001	0	0	0	0	0	0	0	0	0	0	0	0	2016	France	Cat	ST398_9
SRR15903565_L001_R1_001	0	0	0	0	0	0	0	0	0	0	0	0	2015	France	Cat	ST398_10
SRR15903566_L001_R1_001	0	0	0	1	0	0	0	0	0	1	0	0	2018	France	Cattle	ST398_14
SRR15903567_L001_R1_001	0	0	0	0	0	0	0	0	0	0	0	0	2014	France	Horse	ST398_9
SRR15903568_L001_R1_001	0	0	0	0	1	0	1	0	0	1	0	0	2017	France	Cattle	ST398_24
SRR15903569_L001_R1_001	0	0	0	1	0	0	0	0	0	1	0	0	2019	France	Horse	ST398_26
SRR15903570_L001_R1_001	0	0	0	1	0	0	0	0	0	1	0	0	2019	France	Horse	ST398_26
SRR15903571_L001_R1_001	0	0	0	1	0	0	0	0	0	1	0	0	2018	France	Dog	ST398_26
SRR15903572_L001_R1_001	0	0	0	1	0	0	0	0	0	1	0	0	2017	France	Horse	ST398_26
SRR15903573_L001_R1_001	0	0	0	1	0	0	0	0	0	1	0	0	2017	France	Horse	ST398_26
SRR15903574_L001_R1_001	0	0	0	1	0	0	0	0	0	1	0	0	2019	France	Horse	ST398_26
SRR15903575_L001_R1_001	0	0	0	1	0	0	0	0	0	1	0	0	2019	France	Horse	ST398_26
SRR15903576_L001_R1_001	0	0	0	1	0	0	0	0	0	1	0	0	2018	France	Horse	ST398_26
SRR15903577_L001_R1_001	0	0	0	1	0	0	0	0	0	1	0	0	2017	France	Cattle	ST398_14
SRR15903578_L001_R1_001	0	0	0	1	0	0	0	0	0	1	0	0	2018	France	Horse	ST398_26
SRR15903579_L001_R1_001	0	0	0	1	0	0	0	0	0	1	0	0	2019	France	Dog	ST398_26
SRR15903580_L001_R1_001	0	0	0	1	0	0	0	0	0	1	0	0	2019	France	Dog	ST398_26
SRR15903581_L001_R1_001	0	0	0	1	0	0	0	0	0	1	0	0	2018	France	Dog	ST398_26
SRR15903582_L001_R1_001	0	0	0	1	0	0	0	0	0	1	0	0	2017	France	Dog	ST398_26
SRR15903583_L001_R1_001	0	0	0	1	0	0	0	0	0	1	0	0	2017	France	Goat	ST398_14
SRR5054902_L001_R1_001	0	0	0	0	0	0	0	0	0	0	1	1	2010	China	Human	ST398_21
SRR5054903_L001_R1_001	0	0	0	0	0	0	0	0	0	1	0	0	2011	China	Human	ST398_2
SRR5054904_L001_R1_001	0	0	0	0	0	0	0	0	0	0	0	0	2014	China	Human	ST398_19
SRR5054905_L001_R1_001	0	0	0	0	0	0	0	0	0	0	0	0	2014	China	Cattle	ST398_21
SRR5054906_L001_R1_001	0	0	0	0	0	0	0	0	0	0	0	0	2011	China	Human	ST398_19
SRR5054907_L001_R1_001	0	0	0	0	0	0	0	0	0	0	1	1	2011	China	Human	ST398_21
SRR5054908_L001_R1_001	0	0	0	0	0	0	0	0	0	0	0	0	2012	China	Human	ST398_19
SRR5054909_L001_R1_001	0	0	0	0	0	0	0	0	0	0	0	0	2014	China	Human	ST398_19
SRR5054910_L001_R1_001	0	0	0	0	0	0	0	0	0	0	0	0	2012	China	Human	ST398_18
SRR5054911_L001_R1_001	0	0	0	0	0	0	0	0	0	0	0	0	2012	China	Human	ST398_21
SRR5054912_L001_R1_001	0	0	0	0	0	0	0	0	0	0	0	0	2010	China	Human	ST398_21
SRR5054913_L001_R1_001	0	0	0	0	0	0	0	0	0	0	1	1	2012	China	Human	ST398_21
SRR5054914_L001_R1_001	0	0	0	0	0	0	0	0	0	0	1	1	2014	China	Human	ST398_21
SRR5054915_L001_R1_001	0	0	0	0	0	0	0	0	0	0	0	0	2012	China	Human	ST398_19
SRR5054916_L001_R1_001	0	0	0	0	0	0	0	0	0	0	0	0	2012	China	Human	ST398_21
SRR5054917_L001_R1_001	0	0	0	1	0	0	0	0	0	1	0	0	2012	China	Human	ST398_21
SRR5054918_L001_R1_001	0	0	0	0	0	0	0	0	0	0	0	0	2014	China	Human	ST398_19
SRR5054919_L001_R1_001	0	0	0	0	0	0	0	0	0	0	0	0	2014	China	Human	ST398_19
SRR5054920_L001_R1_001	0	0	0	0	0	0	0	0	0	0	1	1	2012	China	Human	ST398_21
SRR5054921_L001_R1_001	0	0	0	0	0	0	0	0	0	0	0	0	2014	China	Human	ST398_19
SRR5054922_L001_R1_001	0	0	0	0	0	0	0	0	0	0	0	0	2012	China	Human	ST398_19
SRR5054923_L001_R1_001	0	0	0	0	0	0	0	0	0	0	0	0	2014	China	Cattle	ST398_10
SRR5054924_L001_R1_001	0	0	0	0	0	0	0	0	0	0	0	0	2012	China	Human	ST398_19
SRR5054925_L001_R1_001	0	0	0	0	0	0	0	0	0	1	0	0	2014	China	Human	ST398_2
SRR5054926_L001_R1_001	0	0	0	0	0	0	0	0	0	0	0	0	2011	China	Human	ST398_19
SRR5054927_L001_R1_001	0	0	0	0	0	0	0	0	0	0	0	0	2014	China	Human	ST398_19
SRR5054928_L001_R1_001	0	0	0	0	0	0	0	0	0	0	0	0	2015	China	Cattle	ST398_21
SRR5054929_L001_R1_001	0	0	0	0	0	0	0	0	0	0	1	1	2010	China	Human	ST398_1
SRR5054930_L001_R1_001	0	0	0	0	0	0	0	0	0	0	1	1	2012	China	Human	ST398_1
SRR5054931_L001_R1_001	0	0	0	0	0	0	0	0	0	0	0	0	2010	China	Human	ST398_18
SRR5054932_L001_R1_001	0	0	0	0	0	0	0	0	0	0	1	1	2011	China	Human	ST398_21
SRR5054933_L001_R1_001	0	0	0	0	0	0	0	0	0	0	0	0	2014	China	Cattle	ST398_21
SRR5054936_L001_R1_001	0	0	0	0	0	0	0	0	0	1	0	0	2014	China	Human	ST398_2
SRR5054937_L001_R1_001	0	0	0	0	0	0	0	0	0	0	0	1	2010	China	Human	ST398_21
SRR5054938_L001_R1_001	0	0	0	0	0	0	0	0	0	0	1	1	2011	China	Human	ST398_1
SRR5054939_L001_R1_001	0	0	0	0	0	0	0	0	0	0	0	0	2012	China	Human	ST398_18
SRR5054940_L001_R1_001	0	0	0	0	0	0	0	0	0	0	0	0	2014	China	Human	ST398_10
SRR5054941_L001_R1_001	0	0	0	0	0	0	0	0	0	0	0	0	2014	China	Human	ST398_19
SRR5054942_L001_R1_001	0	0	0	0	0	0	0	0	0	0	0	0	2012	China	Human	ST398_18
SRR5054943_L001_R1_001	0	0	0	0	0	0	0	0	0	0	0	0	2015	China	Cattle	ST398_21
SRR5054944_L001_R1_001	0	0	0	0	0	0	0	0	0	0	0	0	2015	China	Cattle	ST398_10
SRR5054945_L001_R1_001	0	0	0	0	0	0	0	0	0	0	0	0	2012	China	Human	ST398_19
SRR5054946_L001_R1_001	0	0	0	0	0	0	0	0	0	0	0	0	2015	China	Cattle	ST398_18
SRR5054947_L001_R1_001	0	0	0	0	0	0	0	0	0	0	0	0	2014	China	Cattle	ST398_18
SRR5054948_L001_R1_001	0	0	0	0	0	0	0	0	0	0	0	0	2014	China	Human	ST398_19
SRR5054949_L001_R1_001	0	0	0	0	0	0	0	0	0	0	0	0	2014	China	Cattle	ST398_21
SRR5054950_L001_R1_001	0	0	0	0	0	0	0	0	0	0	0	0	2010	China	Human	ST398_21
SRR5054951_L001_R1_001	0	0	0	0	0	0	0	0	0	0	1	1	2011	China	Human	ST398_21
SRR5054952_L001_R1_001	0	0	0	0	0	0	0	0	0	0	0	0	2012	China	Human	ST398_21
SRR5054953_L001_R1_001	0	0	0	0	0	0	0	0	0	0	1	1	2012	China	Human	ST398_1
SRR5054954_L001_R1_001	0	0	0	0	0	0	0	0	0	0	0	0	2014	China	Human	ST398_19
SRR5054956_L001_R1_001	0	0	0	0	0	0	0	0	0	0	0	0	2011	China	Human	ST398_19
SRR5054957_L001_R1_001	0	0	0	0	0	0	0	0	0	0	0	0	2014	China	Cattle	ST398_21
SRR5054958_L001_R1_001	0	0	0	0	0	0	0	0	0	0	0	0	2014	China	Human	ST398_19
SRR5054960_L001_R1_001	0	0	0	0	0	0	0	0	0	0	0	0	2015	China	Cattle	ST398_21
SRR5054961_L001_R1_001	0	0	0	0	0	0	0	0	0	0	0	0	2011	China	Human	ST398_19
SRR5054962_L001_R1_001	0	0	0	0	0	0	0	0	0	0	0	0	2014	China	Human	ST398_10
SRR5054963_L001_R1_001	0	0	0	0	0	0	0	0	0	0	0	0	2015	China	Cattle	ST398_18
SRR5054964_L001_R1_001	0	0	0	1	0	0	0	0	0	1	1	1	2011	China	Human	ST398_19
SRR5054965_L001_R1_001	0	0	0	0	0	0	0	0	0	0	0	0	2014	China	Cattle	ST398_18
SRR5054966_L001_R1_001	0	0	0	0	0	0	0	0	0	0	1	1	2012	China	Human	ST398_21
SRR5054967_L001_R1_001	0	0	0	0	0	0	0	0	0	0	0	0	2010	China	Human	ST398_19
SRR5054968_L001_R1_001	0	0	0	0	0	0	0	0	0	0	0	0	2014	China	Cattle	ST398_21
SRR5054969_L001_R1_001	0	0	0	0	0	0	0	0	0	0	1	1	2014	China	Human	ST398_21
SRR5054970_L001_R1_001	0	0	0	0	0	0	0	0	0	0	0	0	2011	China	Human	ST398_19
SRR5054971_L001_R1_001	0	0	0	0	0	0	0	0	0	1	0	0	2012	China	Human	ST398_19
SRR5054972_L001_R1_001	0	0	0	0	0	0	0	0	0	0	0	0	2014	China	Human	ST398_19
SRR5054973_L001_R1_001	0	0	0	0	0	0	0	0	0	1	0	0	2012	China	Human	ST398_2
SRR5054974_L001_R1_001	0	0	0	0	0	0	0	0	0	0	0	0	2014	China	Human	ST398_19
SRR5054975_L001_R1_001	0	0	0	0	0	0	0	0	0	0	0	0	2012	China	Human	ST398_19
SRR5054976_L001_R1_001	0	0	0	0	0	0	0	0	0	0	0	0	2012	China	Human	ST398_19
SRR5054977_L001_R1_001	0	0	0	0	0	0	0	0	0	0	0	0	2012	China	Human	ST398_10
SRR5062006_L001_R1_001	0	0	0	0	0	0	0	0	0	0	0	0	2011	China	Human	ST398_21
SRR6475659_L001_R1_001	0	0	0	0	1	0	1	0	0	1	0	0	2015	Denmark	Cattle	ST398_12
SRR6475660_L001_R1_001	0	0	0	0	1	0	1	0	0	1	0	0	2015	Denmark	Cattle	ST398_12
SRR6475661_L001_R1_001	0	0	0	0	1	0	1	0	0	1	0	0	2015	Denmark	Cattle	ST398_12
SRR6475662_L001_R1_001	0	0	0	0	1	0	1	0	0	1	0	0	2015	Denmark	Cattle	ST398_12
SRR6475663_L001_R1_001	0	0	0	0	1	0	1	0	0	1	0	0	2015	Denmark	Cattle	ST398_12
SRR6475664_L001_R1_001	0	0	0	0	1	0	1	0	0	1	0	0	2015	Denmark	Cattle	ST398_12
SRR6475665_L001_R1_001	0	0	0	0	1	0	1	0	0	1	0	0	2015	Denmark	Cattle	ST398_12
SRR6475666_L001_R1_001	0	0	0	0	1	0	1	0	0	1	0	0	2015	Denmark	Cattle	ST398_12
SRR6475667_L001_R1_001	0	0	0	0	1	0	1	0	0	1	0	0	2015	Denmark	Cattle	ST398_17
SRR6475668_L001_R1_001	0	0	0	0	0	0	0	0	0	1	0	0	2015	Denmark	Cattle	ST398_15
SRR6475669_L001_R1_001	0	0	0	0	0	0	0	0	0	1	0	0	2015	Denmark	Cattle	ST398_15
SRR6475670_L001_R1_001	0	0	0	0	0	0	0	0	0	1	0	0	2015	Denmark	Cattle	ST398_15
SRR6475671_L001_R1_001	0	0	0	0	0	0	0	0	0	1	0	0	2015	Denmark	Cattle	ST398_15
SRR6475672_L001_R1_001	0	0	0	0	0	0	0	0	0	1	0	0	2015	Denmark	Cattle	ST398_15
SRR6475673_L001_R1_001	0	0	0	0	0	0	0	0	0	1	0	0	2015	Denmark	Cattle	ST398_15
SRR6475674_L001_R1_001	0	0	0	0	0	0	0	0	0	1	0	0	2015	Denmark	Cattle	ST398_15
SRR6475675_L001_R1_001	0	0	0	0	0	0	0	0	0	1	0	0	2015	Denmark	Cattle	ST398_15
SRR6475676_L001_R1_001	0	0	0	0	1	0	1	0	0	1	0	0	2015	Denmark	Cattle	ST398_17
SRR6475677_L001_R1_001	0	0	0	0	0	0	0	0	0	1	0	0	2015	Denmark	Cattle	ST398_15
SRR7825589_L001_R1_001	0	0	0	1	0	0	0	0	0	1	0	0	2017	Germany	Poultry	ST398_14
SRR7825592_L001_R1_001	0	0	0	1	0	0	0	0	0	1	0	0	2017	Poland	Poultry	ST398_14
SRR7825594_L001_R1_001	0	0	0	1	0	0	0	0	0	1	0	0	2017	Czech Republic	Human	ST398_14
SRR9024758_L001_R1_001	0	0	0	0	0	0	0	0	0	0	0	0	2010	China	Human	ST398_21
SRR9025065_L001_R1_001	0	0	0	0	0	0	0	0	0	0	0	0	2010	China	Human	ST398_21
SRR9025119_L001_R1_001	0	0	0	0	0	0	0	0	0	0	0	0	2014	Canada	Human	ST398_9
SRR9025137_L001_R1_001	0	0	0	0	0	0	0	0	0	0	0	0	2014	Canada	Human	ST398_9
SRR9026202_L001_R1_001	0	0	0	0	0	0	0	0	0	0	0	0	2018	Australia	Human	ST398_10
SRR9026203_L001_R1_001	0	0	0	0	0	0	0	0	0	0	0	0	2018	Australia	Human	ST398_10
SRR9026204_L001_R1_001	0	0	0	0	0	0	0	0	0	0	0	0	2018	Australia	Human	ST398_10
SRR9029857_L001_R1_001	0	0	0	0	0	0	0	0	0	0	0	0	2014	Canada	Human	ST398_10
SRR9030009_L001_R1_001	0	0	0	0	0	0	0	0	0	0	0	0	2011	China	Human	ST398_18
SRR9046749_L001_R1_001	0	0	0	0	0	0	0	0	0	1	0	0	2016	China	Human	ST398_2
SRR9046750_L001_R1_001	0	0	0	0	0	0	0	0	0	1	0	0	2016	China	Human	ST398_2
SRR9046751_L001_R1_001	0	0	0	0	0	0	0	0	0	1	0	0	2016	China	Human	ST398_2
SRR9046752_L001_R1_001	0	0	0	0	0	0	0	0	0	1	0	0	2016	China	Human	ST398_2
SRR9046753_L001_R1_001	0	0	0	0	0	0	0	0	0	0	0	0	2012	China	Human	ST398_18
SRR9046754_L001_R1_001	0	0	0	0	0	0	0	0	0	0	0	0	2016	China	Human	ST398_19
SRR9046755_L001_R1_001	0	0	0	0	0	0	0	0	0	1	0	0	2016	China	Human	ST398_2
SRR9046756_L001_R1_001	0	0	0	0	0	0	0	0	0	0	0	0	1999	China	Human	ST398_21
SRR9046757_L001_R1_001	0	0	0	0	0	0	0	0	0	0	0	0	2016	China	Human	ST398_21
SRR9141411_L001_R1_001	0	0	0	0	0	0	0	0	0	0	0	0	2014	China	Human	ST398_10
SRR9150090_L001_R1_001	0	0	0	0	0	0	0	0	0	0	0	0	2014	China	Human	ST398_18
SRR9200081_L001_R1_001	0	0	0	0	1	0	1	0	0	1	0	0	2018	Italy	Pig	ST398_12
SRR9200082_L001_R1_001	0	0	0	0	1	0	1	0	0	1	0	0	2018	Italy	Human	ST398_12
SRR9200083_L001_R1_001	0	0	0	0	1	0	1	0	0	1	0	0	2018	Italy	Pig	ST398_25
SRR9200084_L001_R1_001	0	0	0	0	1	0	1	0	0	1	0	0	2018	Italy	Pig	ST398_25
SRR9200085_L001_R1_001	0	0	0	0	1	0	1	0	0	1	0	0	2018	Italy	Pig	ST398_25
SRR9200086_L001_R1_001	0	0	0	0	1	0	1	0	0	1	0	0	2018	Italy	Pig	ST398_25
SRR9200087_L001_R1_001	0	0	0	0	1	0	1	0	0	1	0	0	2018	Italy	Pig	ST398_25
SRR9200088_L001_R1_001	0	0	0	0	1	0	1	0	0	1	0	0	2018	Italy	Pig	ST398_25
SRR9200089_L001_R1_001	0	0	0	0	1	0	1	0	0	1	0	0	2018	Italy	Human	ST398_25
SRR9200090_L001_R1_001	0	0	0	0	1	0	1	0	0	1	0	0	2018	Italy	Human	ST398_25
ST398-1547_S15_L001_R1_001	0	0	0	1	0	0	0	0	0	1	0	0	2009	The Netherlands	Cattle	ST398_26
ST398-1550_S16_L001_R1_001	0	0	0	0	1	0	1	0	0	1	0	0	2009	The Netherlands	Cattle	ST398_13
ST398-1553_S1_L001_R1_001	0	0	0	0	1	0	1	0	0	1	0	0	2009	The Netherlands	Cattle	ST398_25
ST398-1554_S2_L001_R1_001	0	0	0	1	0	0	0	0	0	1	0	0	2009	The Netherlands	Cattle	ST398_26
ST398-1555_S3_L001_R1_001	0	0	0	1	0	0	0	0	0	1	0	0	2009	The Netherlands	Cattle	ST398_26
ST398-1564_S4_L001_R1_001	0	0	0	0	1	0	1	0	0	1	0	0	2009	The Netherlands	Cattle	ST398_23
ST398-1566_S1_L001_R1_001	0	0	0	1	0	0	0	0	0	1	0	0	2009	The Netherlands	Cattle	ST398_26
ST398-1k19-5_S10_L001_R1_001	0	0	0	0	1	0	1	0	0	1	0	0	2009	The Netherlands	Poultry	ST398_25
ST398-1p1_S10_L001_R1_001	0	0	0	0	1	0	1	0	0	1	0	0	2007	The Netherlands	Pig	ST398_8
ST398-1p3_S9_L001_R1_001	0	0	0	1	0	0	0	0	0	1	0	0	2007	The Netherlands	Pig	ST398_26
ST398-1p7_S14_L001_R1_001	0	0	0	0	1	0	1	0	0	1	0	0	2007	The Netherlands	Pig	ST398_8
ST398-2376_S16_L001_R1_001	0	0	0	1	0	0	0	0	0	1	0	0	2009	The Netherlands	Human	ST398_26
ST398-2638_S3_L001_R1_001	0	0	0	0	1	0	1	0	0	1	0	0	2009	The Netherlands	Human	ST398_15
ST398-2641_S6_L001_R1_001	0	0	0	1	0	0	0	0	0	1	0	0	2009	The Netherlands	Human	ST398_26
ST398-2657_S13_L001_R1_001	0	0	0	0	1	0	1	0	0	1	0	0	2009	The Netherlands	Human	ST398_25
ST398-2k50-7_S11_L001_R1_001	0	0	0	0	1	0	1	0	0	1	0	0	2009	The Netherlands	Poultry	ST398_25
ST398-2p5_S13_L001_R1_001	0	0	0	0	1	0	1	0	0	1	0	0	2007	The Netherlands	Pig	ST398_7
ST398-3176_S5_L001_R1_001	0	0	0	0	1	0	1	0	0	1	0	0	2009	The Netherlands	Human	ST398_7
ST398-3345_S7_L001_R1_001	0	0	0	0	1	0	1	0	0	1	0	0	2009	The Netherlands	Human	ST398_23
ST398-3k1-5_S12_L001_R1_001	0	0	0	1	0	0	0	0	0	1	0	0	2009	The Netherlands	Poultry	ST398_26
ST398-3k44-5_S13_L001_R1_001	0	0	0	1	0	0	0	0	0	1	0	0	2009	The Netherlands	Poultry	ST398_26
ST398-4483_S15_L001_R1_001	0	0	0	1	0	0	0	0	0	1	0	0	2009	The Netherlands	Horse	ST398_26
ST398-4499_S12_L001_R1_001	0	0	0	0	1	0	1	0	0	1	0	0	2009	The Netherlands	Human	ST398_8
ST398-4967_S16_L001_R1_001	0	0	0	1	0	0	0	0	0	1	0	0	2009	The Netherlands	Horse	ST398_26
ST398-4968_S14_L001_R1_001	0	0	0	1	0	0	0	0	0	1	0	0	2009	The Netherlands	Horse	ST398_26
ST398-5215_S14_L001_R1_001	0	0	0	0	1	0	1	0	0	1	0	0	2009	The Netherlands	Human	ST398_25
ST398-530_S15_L001_R1_001	0	0	0	1	0	0	0	0	0	1	0	0	2009	The Netherlands	Human	ST398_26
ST398-5p1_S12_L001_R1_001	0	0	0	0	1	0	1	0	0	1	0	0	2007	The Netherlands	Pig	ST398_7
ST398-6p7_S11_L001_R1_001	0	0	0	0	1	0	1	0	0	1	0	0	2007	The Netherlands	Pig	ST398_24
ST398-91040855_S16_L001_R1_001	0	0	0	0	0	0	0	0	0	0	0	0	2017	Germany	Human	ST398_10
ST398-91041820_S1_L001_R1_001	0	0	0	0	1	0	1	0	0	1	0	0	2017	Germany	Human	ST398_12
ST398-91051409_S2_L001_R1_001	0	0	0	0	0	0	0	0	0	0	0	0	2017	Germany	Human	ST398_21
ST398-91053560_S2_L001_R1_001	0	0	0	0	1	0	1	0	0	1	0	0	2017	Germany	Human	ST398_12
ST398-91069558_S3_L001_R1_001	0	0	0	0	0	0	0	0	0	0	0	0	2017	Germany	Human	ST398_10
ST398-91077303_S4_L001_R1_001	0	0	0	0	0	0	0	0	0	0	0	0	2017	Germany	Human	ST398_10
ST398-91102308_S5_L001_R1_001	0	0	0	0	0	0	0	0	0	0	0	0	2017	Germany	Human	ST398_9
ST398-91116462_S6_L001_R1_001	0	0	0	0	0	0	0	0	0	0	0	0	2017	Germany	Human	ST398_10
ST398-91122249_S4_L001_R1_001	0	0	0	0	0	0	0	0	0	0	0	0	2017	Germany	Human	ST398_10
ST398-91124784_S7_L001_R1_001	0	0	0	0	0	0	0	0	0	0	0	0	2017	Germany	Human	ST398_10
ST398-91128401_S8_L001_R1_001	0	0	0	0	1	0	1	0	0	1	0	0	2017	Germany	Human	ST398_12
ST398-91134167_S9_L001_R1_001	0	0	0	0	0	0	0	0	0	0	0	0	2017	Germany	Human	ST398_10
ST398-H-17-414_S6_L001_R1_001	0	0	0	0	0	0	0	0	0	0	0	0	2017	Germany	Rat	ST398_25
ST398-KS-17-20_S3_L001_R1_001	0	0	0	0	1	0	1	0	0	1	0	0	2016	Germany	Rat	ST398_25
ST398-KS-17-22_S1_L001_R1_001	0	0	0	0	1	0	1	0	0	1	0	0	2016	Germany	Rat	ST398_25
ST398-KS-17-394_S4_L001_R1_001	0	0	0	0	0	0	0	0	0	0	0	0	2017	Germany	Rat	ST398_25
ST398-KS-17-405_S5_L001_R1_001	0	0	0	0	0	0	0	0	0	0	0	0	2017	Germany	Rat	ST398_25
ST398-KS-17-419_S7_L001_R1_001	0	0	0	0	0	0	0	0	0	0	0	0	2017	Germany	Rat	ST398_25
ST398-KS-17-420_S8_L001_R1_001	0	0	0	0	0	0	0	0	0	0	0	0	2017	Germany	Rat	ST398_25
ST398-sh05143_S9_L001_R1_001	0	0	0	0	0	0	0	0	0	0	0	0	2010	Germany	Human	ST398_10
ST398-sh09248_S12_L001_R1_001	0	0	0	0	0	0	0	0	0	0	0	0	2010	Germany	Human	ST398_17
ST398-sh25416_S10_L001_R1_001	0	0	0	0	0	0	0	0	0	0	0	0	2010	Germany	Human	ST398_10
ST398-sh33199_S11_L001_R1_001	0	0	0	0	0	0	0	0	0	0	0	0	2010	Germany	Human	ST398_15
ST398-sh42507_S13_L001_R1_001	0	0	0	0	1	0	1	0	0	1	0	0	2010	Germany	Human	ST398_13
ST398-sh49730_S14_L001_R1_001	0	0	0	0	0	0	0	0	0	0	0	0	2010	Germany	Human	ST398_10
ST398-TB27855_S2_L001_R1_001	0	0	0	0	0	0	0	0	0	0	0	0	1998	The Netherlands	Human	ST398_10

## Sheet: Table S5
Table S5 Definition of clades.
Isolate source	Phage		Classification of ST398 clades	Description
	StauST398_4	StauST398_5
Animal	Absent	Absent	Animal-LA	ST398 isolated from animal without phage of StauST398_4 and StauST398_5
Human	Absent	Absent	Human-LA	ST398 isolated from human without phage of StauST398_4 and StauST398_5
Human	Present	Present	EM-HA-ST398	ST398 isolate from human harboring phage of StauST398_4 and StauST398_5
Human	Present	Absent	AN-HA-ST398	ST398 isolate from human harboring only phage StauST398_4 not StauST398_5

## Sheet: Table S6
Table S6 Single-Nucleotide Polymorphisms of the representative sequences of the top ten subtypes dominant in the global isolates.
CHROM	POS	ID	REF	ALT	QUAL	FILTER	INFO	FORMAT	ST398_9_representative	ST398_8_representative	ST398_2_representative	ST398_25_representative	ST398_26_representative	ST398_20_representative	ST398_21_representative	ST398_10_representative	ST398_23_representative	ST398_24_representative
1	4226	.	C	T	.	.	.	GT	0	1	1	1	1	1	1	0	1	1
1	7119	.	A	C	.	.	.	GT	0	0	1	0	0	0	0	0	0	0
1	7639	.	G	A	.	.	.	GT	0	0	0	0	1	0	0	0	0	0
1	11940	.	G	A	.	.	.	GT	0	0	1	0	0	0	0	0	0	0
1	15592	.	G	A	.	.	.	GT	0	1	1	1	1	1	1	1	1	1
1	32174	.	C	T	.	.	.	GT	0	0	0	1	1	0	0	0	1	1
1	34548	.	G	A	.	.	.	GT	0	1	1	1	1	1	1	0	1	1
1	45462	.	T	C	.	.	.	GT	0	0	1	0	0	0	0	0	0	0
1	45771	.	C	T	.	.	.	GT	0	0	1	0	0	0	0	0	0	0
1	46709	.	T	C	.	.	.	GT	0	1	1	1	1	1	1	1	1	1
1	49369	.	T	C	.	.	.	GT	0	0	1	0	0	0	0	0	0	0
1	56518	.	G	A	.	.	.	GT	0	0	0	1	1	0	0	0	1	1
1	57710	.	C	T	.	.	.	GT	0	0	0	1	1	0	0	0	1	1
1	64345	.	A	C	.	.	.	GT	0	1	1	1	1	1	1	1	1	1
1	73662	.	A	G	.	.	.	GT	0	1	0	0	0	0	0	0	0	0
1	92119	.	G	T	.	.	.	GT	0	0	1	0	0	0	0	0	0	0
1	104411	.	A	C	.	.	.	GT	0	0	0	1	1	0	0	0	1	1
1	106281	.	T	C	.	.	.	GT	0	1	1	1	1	1	1	0	1	1
1	106965	.	A	G	.	.	.	GT	0	0	1	0	0	0	0	0	0	0
1	113414	.	A	T	.	.	.	GT	0	0	0	1	1	0	0	0	1	1
1	125470	.	G	T	.	.	.	GT	0	0	0	0	0	1	0	0	0	0
1	127055	.	G	T	.	.	.	GT	0	0	1	0	0	0	0	0	0	0
1	131408	.	C	T	.	.	.	GT	0	0	1	0	0	0	0	0	0	0
1	132372	.	G	T	.	.	.	GT	0	0	0	1	1	0	0	0	1	1
1	140544	.	A	*,T	.	.	.	GT	1	0	2	1	1	2	2	1	2	1
1	144477	.	A	G	.	.	.	GT	0	0	1	0	0	0	0	0	0	0
1	145806	.	G	A	.	.	.	GT	0	1	1	1	1	1	1	0	1	1
1	146043	.	T	C	.	.	.	GT	0	1	1	1	1	1	1	0	1	1
1	146310	.	T	C	.	.	.	GT	0	1	0	0	0	0	0	0	0	0
1	153454	.	T	C	.	.	.	GT	0	1	1	1	1	1	1	0	1	1
1	155152	.	G	A	.	.	.	GT	0	0	0	1	1	0	0	0	1	1
1	161874	.	T	C	.	.	.	GT	0	1	1	1	1	1	1	0	1	1
1	171568	.	C	T	.	.	.	GT	0	1	0	1	1	1	0	0	1	1
1	185102	.	T	C	.	.	.	GT	0	1	0	0	0	0	0	0	0	0
1	185294	.	C	A	.	.	.	GT	0	1	0	0	0	0	0	0	0	0
1	185844	.	T	A	.	.	.	GT	0	1	1	1	1	1	1	1	1	1
1	204433	.	T	A	.	.	.	GT	0	0	0	1	1	0	0	0	1	1
1	210218	.	C	A	.	.	.	GT	0	1	1	1	1	1	1	0	1	1
1	218803	.	T	G	.	.	.	GT	0	1	1	1	1	1	1	0	1	1
1	225330	.	C	T	.	.	.	GT	0	1	0	0	0	0	0	0	0	0
1	226909	.	A	G	.	.	.	GT	0	0	1	0	0	0	0	0	0	0
1	234082	.	G	A	.	.	.	GT	0	0	1	0	0	0	0	0	0	0
1	246781	.	G	A	.	.	.	GT	0	0	1	0	0	0	0	0	0	0
1	250662	.	C	T	.	.	.	GT	0	0	1	0	0	0	0	0	0	0
1	252550	.	G	A	.	.	.	GT	0	1	1	1	1	1	1	0	1	1
1	252923	.	C	T	.	.	.	GT	0	1	0	0	0	0	0	0	0	0
1	253931	.	T	C	.	.	.	GT	0	1	1	1	1	1	1	1	1	1
1	255423	.	T	C	.	.	.	GT	0	0	1	0	0	0	0	0	0	0
1	277363	.	C	A	.	.	.	GT	0	0	1	0	0	0	0	0	0	0
1	281915	.	T	G	.	.	.	GT	0	1	1	1	1	1	1	0	1	1
1	287976	.	A	G	.	.	.	GT	0	0	0	0	1	0	0	0	0	0
1	289601	.	C	T	.	.	.	GT	0	0	1	0	0	0	0	0	0	0
1	293024	.	T	A	.	.	.	GT	0	1	1	1	1	1	1	1	1	1
1	295615	.	G	A	.	.	.	GT	0	0	0	0	0	0	0	0	1	0
1	305402	.	T	C	.	.	.	GT	0	0	1	0	0	0	0	0	0	0
1	309987	.	G	A	.	.	.	GT	0	0	0	0	1	0	0	0	0	0
1	312868	.	G	A	.	.	.	GT	0	1	0	0	0	0	0	0	0	0
1	312894	.	A	G	.	.	.	GT	0	1	1	1	1	1	1	1	1	1
1	314723	.	G	A	.	.	.	GT	0	1	1	1	1	1	1	1	1	1
1	315078	.	T	G	.	.	.	GT	0	0	0	1	1	0	0	0	1	1
1	317519	.	C	T	.	.	.	GT	0	0	0	1	1	0	0	0	1	1
1	318344	.	A	C	.	.	.	GT	0	1	1	1	1	1	1	1	1	1
1	319054	.	G	A	.	.	.	GT	0	1	1	1	1	1	1	1	1	1
1	324913	.	C	T	.	.	.	GT	0	0	0	1	1	0	0	0	1	1
1	337019	.	T	C	.	.	.	GT	0	1	1	1	1	1	1	0	1	1
1	344894	.	G	A	.	.	.	GT	0	1	1	1	1	1	1	0	1	1
1	346115	.	C	T	.	.	.	GT	0	1	1	1	1	1	1	1	1	1
1	346523	.	G	C	.	.	.	GT	0	0	1	0	0	0	0	0	0	0
1	349166	.	A	G	.	.	.	GT	0	0	0	0	0	0	0	0	1	0
1	360092	.	G	C	.	.	.	GT	0	1	1	1	1	1	1	0	1	1
1	362064	.	G	T	.	.	.	GT	0	0	1	0	0	0	0	0	0	0
1	364594	.	A	C	.	.	.	GT	0	1	0	0	0	0	0	0	0	0
1	375218	.	G	T	.	.	.	GT	0	1	0	1	1	1	0	0	1	1
1	379046	.	T	G	.	.	.	GT	0	1	0	0	0	0	0	0	0	0
1	379525	.	G	A	.	.	.	GT	0	1	0	0	0	0	0	0	0	0
1	384883	.	T	G	.	.	.	GT	0	1	1	1	1	1	1	1	1	1
1	394891	.	G	A	.	.	.	GT	0	0	0	0	1	1	0	0	0	1
1	394892	.	G	C,*	.	.	.	GT	0	0	0	0	1	2	0	0	0	1
1	394893	.	G	C	.	.	.	GT	0	0	0	0	1	1	0	0	0	1
1	402362	.	C	T	.	.	.	GT	0	0	0	0	1	0	0	0	0	0
1	407470	.	A	T	.	.	.	GT	0	0	0	1	1	0	0	0	1	1
1	412082	.	G	T	.	.	.	GT	0	0	1	0	0	0	0	0	0	0
1	415706	.	A	G	.	.	.	GT	0	0	0	1	1	0	0	0	1	1
1	416647	.	G	A	.	.	.	GT	0	0	0	1	1	0	0	0	1	1
1	417537	.	T	A	.	.	.	GT	0	1	0	1	1	1	0	0	1	1
1	420051	.	G	A	.	.	.	GT	0	1	0	0	0	0	0	0	0	0
1	423790	.	C	T	.	.	.	GT	0	1	0	0	0	0	0	0	0	0
1	435035	.	A	T	.	.	.	GT	0	1	1	1	1	1	1	0	1	1
1	445987	.	G	T	.	.	.	GT	0	0	1	0	0	0	0	0	0	0
1	448104	.	T	*,C	.	.	.	GT	1	0	2	2	2	2	2	1	2	1
1	469009	.	G	A	.	.	.	GT	0	0	0	1	1	0	0	0	1	1
1	472307	.	C	T	.	.	.	GT	0	0	1	0	0	0	0	0	0	0
1	485612	.	C	T	.	.	.	GT	0	1	0	0	0	0	0	0	0	0
1	496516	.	C	T	.	.	.	GT	0	1	0	1	1	1	0	0	1	1
1	499258	.	C	A	.	.	.	GT	0	0	0	0	1	0	0	0	0	0
1	500974	.	G	A	.	.	.	GT	0	0	0	1	0	0	0	0	0	0
1	502085	.	A	G	.	.	.	GT	0	1	0	0	0	0	0	0	0	0
1	509949	.	A	G	.	.	.	GT	0	0	0	1	1	0	0	0	1	1
1	512228	.	A	G	.	.	.	GT	0	1	1	1	1	1	1	0	1	1
1	514511	.	C	T	.	.	.	GT	0	0	1	0	0	0	0	0	0	0
1	514789	.	A	G	.	.	.	GT	0	1	1	1	1	1	1	0	1	1
1	517803	.	C	T	.	.	.	GT	0	0	1	0	0	0	0	0	0	0
1	526067	.	A	G	.	.	.	GT	0	1	0	0	0	0	0	0	0	0
1	549326	.	G	A	.	.	.	GT	0	0	1	0	0	0	0	0	0	0
1	555085	.	C	T	.	.	.	GT	0	0	1	0	0	0	0	0	0	0
1	556613	.	C	G	.	.	.	GT	0	1	1	1	1	1	1	0	1	1
1	562871	.	G	A	.	.	.	GT	0	1	1	1	1	1	1	0	1	1
1	565362	.	C	T	.	.	.	GT	0	1	0	0	0	0	0	0	0	0
1	572782	.	T	A	.	.	.	GT	0	1	0	1	1	1	0	0	1	1
1	576786	.	C	A	.	.	.	GT	0	0	1	0	0	0	0	0	0	0
1	580331	.	C	T	.	.	.	GT	0	0	0	1	1	0	0	0	1	1
1	581895	.	G	*,A	.	.	.	GT	1	0	2	1	1	2	1	1	2	2
1	587954	.	G	C	.	.	.	GT	0	1	0	0	0	0	0	0	0	0
1	588716	.	C	T	.	.	.	GT	0	0	0	1	1	0	0	0	1	1
1	609330	.	C	A	.	.	.	GT	0	0	1	0	0	0	0	0	0	0
1	618592	.	G	A	.	.	.	GT	0	1	1	1	1	1	1	0	1	1
1	631351	.	A	G	.	.	.	GT	0	0	1	0	0	0	0	0	0	0
1	637539	.	T	C	.	.	.	GT	0	1	0	0	0	0	0	0	0	0
1	638395	.	C	A	.	.	.	GT	0	0	0	1	1	0	0	0	1	1
1	641955	.	T	C	.	.	.	GT	0	1	1	1	1	1	1	0	1	1
1	657892	.	G	A	.	.	.	GT	0	0	1	0	0	0	0	0	0	0
1	669275	.	C	T	.	.	.	GT	0	1	1	1	1	1	1	1	1	1
1	672657	.	T	G	.	.	.	GT	0	0	0	0	1	0	0	0	0	0
1	673825	.	G	A	.	.	.	GT	0	1	0	0	0	0	0	0	0	0
1	676568	.	C	T	.	.	.	GT	0	0	1	0	0	0	0	0	0	0
1	680278	.	T	C	.	.	.	GT	0	1	1	1	1	1	1	1	1	1
1	683012	.	A	G	.	.	.	GT	0	0	0	1	1	0	0	0	1	1
1	694871	.	C	A	.	.	.	GT	0	0	0	1	1	0	0	0	1	1
1	695415	.	A	G	.	.	.	GT	0	0	1	0	0	0	0	0	0	0
1	700720	.	G	A	.	.	.	GT	0	1	0	0	0	0	0	0	0	0
1	702426	.	G	*,A	.	.	.	GT	0	1	1	1	1	1	1	0	1	2
1	705001	.	T	A	.	.	.	GT	0	1	0	0	0	0	0	0	0	0
1	705169	.	G	A	.	.	.	GT	0	0	0	0	1	0	0	0	0	0
1	705530	.	T	C	.	.	.	GT	0	0	0	1	1	0	0	0	1	1
1	712783	.	G	A	.	.	.	GT	0	1	0	0	0	0	0	0	0	0
1	715617	.	A	*,T	.	.	.	GT	1	0	2	2	2	2	2	1	2	2
1	715991	.	C	T	.	.	.	GT	0	0	0	1	1	0	0	0	1	1
1	723711	.	A	G	.	.	.	GT	0	1	0	0	0	0	0	0	0	0
1	752437	.	G	A	.	.	.	GT	0	1	0	0	0	0	0	0	0	0
1	773073	.	G	A	.	.	.	GT	0	0	0	1	1	0	0	0	1	1
1	775432	.	C	T	.	.	.	GT	0	1	0	0	0	0	0	0	0	0
1	777445	.	A	G	.	.	.	GT	0	1	0	0	0	0	0	0	0	0
1	786770	.	T	C	.	.	.	GT	0	1	0	0	0	0	0	0	0	0
1	791761	.	C	T	.	.	.	GT	0	1	0	0	0	0	0	0	0	0
1	796634	.	C	A	.	.	.	GT	0	1	0	0	0	0	0	0	0	0
1	803160	.	C	T	.	.	.	GT	0	0	0	1	1	0	0	0	1	1
1	810489	.	A	T	.	.	.	GT	0	0	1	0	0	0	0	0	0	0
1	814764	.	T	C	.	.	.	GT	0	0	0	1	1	0	0	0	1	1
1	818494	.	G	A	.	.	.	GT	0	1	0	0	0	0	0	0	0	0
1	821515	.	T	C	.	.	.	GT	0	1	1	1	1	1	1	1	1	1
1	822193	.	A	G	.	.	.	GT	0	1	1	1	1	1	1	0	1	1
1	837053	.	C	A	.	.	.	GT	0	1	0	0	0	0	0	0	0	0
1	844283	.	T	C	.	.	.	GT	0	1	1	1	1	1	1	0	1	1
1	856601	.	G	A	.	.	.	GT	0	1	0	0	0	0	0	0	0	0
1	878263	.	T	*,C	.	.	.	GT	1	0	2	2	2	2	2	1	2	1
1	891501	.	C	T	.	.	.	GT	0	0	1	0	0	0	0	0	0	0
1	905618	.	A	G	.	.	.	GT	0	0	1	0	0	0	0	0	0	0
1	905869	.	G	A	.	.	.	GT	0	0	0	0	1	0	0	0	0	0
1	907866	.	C	T	.	.	.	GT	0	0	0	0	1	0	0	0	0	0
1	921660	.	T	A	.	.	.	GT	0	0	0	1	1	0	0	0	1	1
1	928408	.	A	G	.	.	.	GT	0	1	1	1	1	1	1	0	1	1
1	932163	.	A	*,C	.	.	.	GT	0	1	1	2	2	1	2	0	1	2
1	942268	.	G	T	.	.	.	GT	0	1	0	1	1	1	0	0	1	1
1	944862	.	A	G	.	.	.	GT	0	1	0	0	0	0	0	0	0	0
1	966622	.	A	G	.	.	.	GT	0	0	0	1	1	0	0	0	1	1
1	977603	.	A	C	.	.	.	GT	0	1	1	1	1	1	1	0	1	1
1	980750	.	G	A	.	.	.	GT	0	1	1	1	1	1	1	0	1	1
1	996466	.	G	A	.	.	.	GT	0	0	1	0	0	0	0	0	0	0
1	996700	.	C	T	.	.	.	GT	0	0	1	0	0	0	0	0	0	0
1	1007695	.	C	T	.	.	.	GT	0	0	1	0	0	0	0	0	0	0
1	1015678	.	G	A	.	.	.	GT	0	0	1	0	0	0	0	0	0	0
1	1021025	.	A	G	.	.	.	GT	0	1	0	0	0	0	0	0	0	0
1	1021601	.	T	C	.	.	.	GT	0	0	1	0	0	0	0	0	0	0
1	1022964	.	C	T	.	.	.	GT	0	1	0	0	0	0	0	0	0	0
1	1031741	.	A	T	.	.	.	GT	0	1	1	1	1	1	1	1	1	1
1	1034788	.	C	T	.	.	.	GT	0	1	0	0	0	0	0	0	0	0
1	1040006	.	G	T	.	.	.	GT	0	0	1	0	0	0	0	0	0	0

## Sheet: Table S7
Table S7 Patient demographics of the study population.
	ASPIRE-ICU	ASPIRE-SSI	SAATELLITE
Number of patients	21	31	20
Age, median [IQR]	58 [41-70]	64 [54-73]	52 [43-63]
Male gender (%)	10 (47.6)	23 (74.2)	13 (65)
BMI, median [IQR]	25 [23.3-29.5]	27.8[25.9-32]	26.5[24.4-30.3]
APACHE-II, median [IQR]	26 [14.5-30.5]	NA	16 [13-19]
ASA score, median [IQR]	NA	2 [2-3]	NA
SA colonisation at baseline (%)	21 (100)	30 (96.8)	20 (100)
SA ST398 colonisation at baseline (%)	19 (90.5)	28 (90.3)	19 (95)
SA infection (%)	7 (33.3)	10 (32.3)	20 (40)
SA ST398 infection (%)	2 (9.5)	10 (32.3)	7 (35)
IQR: interquartile range; BMI: body mass index (calculated as weight in kilograms divided by hight in meters squared); APACHE-II: Acute Physiology And Chronic Health Evaluation; ASA: American Society of Anesthesiologists; NA: not applicable.
Such information is not applicable in two patients in ASPIRE-SSI.
